# Supplementary material
Source: ML conference proceedings conference paper supplement (https://openreview.net/forum?id=4BsrGHtvW5)
Supplement: supplementary_material [file 3v1.xls]

## Sheet: reward_data
0	0.608159	1.3844	0.210473	0.454658
100	0.681034	1.87129	0.210473	0.309492
200	0.943435	2.12275	0.31378	0.309492
300	0.943435	2.12275	0.667532	0.309492
400	0.842615	1.64302	1.03846	0.309492
500	0.555731	1.27844	0.967992	1.24542
600	0.799684	0.791552	0.967992	0.935931
700	0.537283	1.23077	0.864685	0.935931
800	1.06488	2.15441	0.862837	2.0059
900	1.06488	2.5154	1.68881	2.00836
1000	0.844422	3.54731	1.97229	1.56512
1100	0.604085	4.62166	2.32009	1.56512
1200	0.604085	3.93099	3.12423	1.56512
1300	1.12825	3.18248	2.89227	0.655336
1400	2.02943	2.32145	2.52867	1.56858
1500	2.34762	1.28954	2.21263	1.07588
1600	2.27113	0.669797	1.86483	2.09179
1700	2.62174	1.13925	1.34416	2.09179
1800	1.91285	2.36789	1.22422	1.9316
1900	1.01167	3.44152	0.495625	1.01591
2000	1.12928	4.34522	0.388181	2.44751
2100	1.28521	5.3495	0.657661	1.4316
2200	1.20976	4.88004	0.374187	1.55031
2300	2.09395	4.76722	0.374187	1.55031
2400	2.90921	4.34187	0.26948	1.55031
2500	2.47341	3.84576	0.26948	0.224668
2600	3.1633	3.25984	1.63076	0.523556
2700	3.95496	3.25984	1.76183	0.404847
2800	2.89362	2.61619	1.76183	1.9757
2900	3.0049	1.92785	1.95391	1.9757
3000	3.56981	1.93063	2.02181	1.86974
3100	3.33106	1.74951	1.11807	2.19529
3200	3.75459	2.43436	1.80775	2.98154
3300	3.87475	2.1448	1.80775	1.82749
3400	3.79656	2.22856	1.61566	2.86097
3500	3.76154	2.74023	1.54776	3.26888
3600	4.26847	2.30704	0.820741	2.64444
3700	2.77813	3.56199	0.83694	1.8582
3800	3.20603	3.20425	1.36844	1.44139
3900	2.4333	3.12049	1.85113	0.407911
4000	2.67939	2.19845	2.01592	0.062052
4100	2.65997	3.77567	2.4004	0.062052
4200	3.25409	1.83586	1.56346	0.281489
4300	3.23119	2.07047	1.43732	1.13034
4400	4.88907	2.16157	2.14149	2.06767
4500	4.92948	3.1306	2.67923	2.00562
4600	4.87564	1.29474	2.29475	2.23393
4700	5.36888	1.46076	2.67812	2.38595
4800	5.49021	2.19898	2.46682	3.41489
4900	4.38477	2.10788	1.27996	2.47756
5000	3.94424	1.13885	0.577426	2.497
5100	4.88037	2.12864	0.70475	2.53727
5200	3.84119	1.96261	0.497376	2.40251
5300	4.2569	0.989786	0.303316	0.524725
5400	5.28803	1.16792	1.14661	0.524725
5500	5.62655	1.65017	2.57718	1.4498
5600	3.85898	0.996267	2.85286	2.90556
5700	4.34228	1.36995	2.99711	3.89691
5800	4.2313	1.74052	3.72983	4.55581
5900	4.097	2.85368	3.26715	4.55581
6000	3.91654	3.86228	2.92741	3.61137
6100	4.34523	5.30564	2.52441	2.14055
6200	4.83142	6.12566	3.08875	1.91555
6300	4.39054	6.56606	2.35602	2.34918
6400	5.31622	7.77493	2.49219	2.34918
6500	4.78229	7.83368	1.49907	2.95482
6600	4.72743	6.53888	2.7575	3.72468
6700	4.17158	7.37306	1.87291	2.72162
6800	5.16162	7.80654	2.69471	1.91381
6900	4.02141	5.60537	2.17793	2.89505
7000	6.80651	4.8624	2.08023	2.36935
7100	7.92351	5.91444	2.15542	2.6976
7200	8.13043	5.30942	3.34258	3.48525
7300	6.72584	6.14242	3.12977	3.31858
7400	6.32806	6.30059	4.16238	4.19769
7500	4.58737	7.08222	4.61809	4.92055
7600	3.42565	6.22606	4.16663	4.5849
7700	3.10218	4.8032	4.39085	5.00699
7800	3.45559	3.61553	3.86136	5.54764
7900	2.54305	3.9346	2.82875	3.86367
8000	2.85794	3.0716	2.40065	4.40048
8100	2.75743	2.39127	1.55938	3.38451
8200	2.58765	3.21366	0.653949	3.05057
8300	3.08356	3.81132	0.574454	2.68756
8400	4.60934	3.74589	1.50647	4.01686
8500	4.92463	4.2967	2.45674	2.87546
8600	5.11106	4.48274	3.65374	3.12783
8700	7.41779	5.75599	5.33741	2.85552
8800	8.44339	5.82587	6.23166	2.55984
8900	7.56695	5.11507	6.21981	1.90836
9000	7.80143	4.57934	6.61774	2.04196
9100	8.61102	4.94069	6.22289	1.9488
9200	6.70442	5.9804	4.03327	2.50388
9300	5.54357	5.98054	3.42204	2.50388
9400	6.57651	7.29842	3.49352	1.95569
9500	6.7037	8.61245	3.54761	1.62381
9600	6.70543	9.07993	5.59064	2.27627
9700	7.48523	6.47946	5.59064	2.37646
9800	8.46418	6.99928	6.0131	2.60527
9900	7.58873	6.87559	5.9138	2.29925
10000	7.1528	7.42224	5.8509	2.29925
10100	6.80957	6.9941	3.61956	1.91538
10200	5.6048	6.48754	4.00108	2.02982
10300	5.44961	7.03975	4.03409	2.87496
10400	6.98633	5.84556	3.44571	3.7568
10500	7.21299	3.39569	2.61057	5.63315
10600	6.91006	2.86405	2.13516	5.20534
10700	8.42594	2.94076	2.25618	4.59689
10800	7.48401	2.41952	3.74746	5.00018
10900	6.48554	3.4723	4.15543	4.11834
11000	5.28987	5.41132	4.29389	3.66868
11100	5.97625	7.15571	4.87617	4.15578
11200	6.06087	8.92628	5.93858	3.39103
11300	6.10064	8.11794	5.6133	2.21075
11400	6.60259	7.82256	5.3558	2.21075
11500	7.17007	6.24018	5.20429	1.20551
11600	7.12435	6.46081	4.44268	0.773918
11700	6.70807	6.48912	4.88257	2.00835
11800	7.10868	6.96078	3.92003	3.42301
11900	5.41731	7.48063	4.46576	4.12053
12000	5.5424	8.04426	4.85681	4.50537
12100	6.26796	8.32233	5.49856	5.16779
12200	6.78643	8.241	3.84184	4.31955
12300	6.65362	8.71811	3.51096	2.97685
12400	7.96619	9.07605	2.74111	2.44301
12500	8.37874	8.0847	2.20066	2.33235
12600	7.3994	6.98902	2.79355	3.09455
12700	7.91604	7.46703	4.01459	4.03231
12800	8.38917	8.09586	4.45397	4.33276
12900	9.3246	9.68264	5.53707	4.16908
13000	10.4899	11.3579	5.5941	4.46003
13100	10.5632	11.3688	5.69345	4.36856
13200	9.9511	11.0248	4.70795	4.19369
13300	9.34684	10.3002	4.4202	5.40838
13400	8.38738	9.57975	6.15785	5.40838
13500	7.86858	10.4204	6.41133	5.18929
13600	8.06783	11.8597	5.69708	5.14242
13700	7.09076	10.4397	5.42275	4.60038
13800	8.57869	10.1346	5.76061	3.17119
13900	7.47077	10.7855	4.62455	5.08838
14000	7.49853	10.4458	5.3495	4.78031
14100	8.33398	10.652	4.95434	3.8999
14200	10.4485	12.3795	7.57934	4.29856
14300	10.2505	11.5262	7.93455	4.58262
14400	12.5449	9.50766	7.6589	3.25236
14500	13.0557	9.26004	8.56763	3.2688
14600	13.5065	9.59343	9.4424	4.56419
14700	12.1686	9.15775	7.59851	5.5599
14800	11.2901	9.8888	7.07303	5.41758
14900	10.0717	10.8333	7.26411	5.26077
15000	9.76254	9.59493	5.43556	5.56104
15100	8.76887	9.16934	4.64684	4.60652
15200	7.87109	9.99762	3.91452	3.88453
15300	9.56235	9.35454	3.51963	4.07546
15400	10.4421	8.94724	2.0793	4.82158
15500	9.76028	10.7663	2.86562	5.12799
15600	9.84076	9.22614	3.40525	4.32577
15700	11.35	7.41029	5.02601	5.65977
15800	10.3597	7.71424	6.09103	6.87103
15900	10.1274	7.01822	8.03323	6.39516
16000	10.211	7.19333	8.95533	5.3126
16100	11.1003	6.76682	10.0748	6.07978
16200	11.4328	7.86254	10.3699	3.51514
16300	11.4893	7.804	9.73861	2.1875
16400	12.0487	7.96505	10.1931	2.48735
16500	13.0302	7.04854	10.3085	5.62459
16600	13.038	7.56255	9.67263	5.11234
16700	12.1735	7.49876	8.4241	7.74078
16800	12.8851	7.4735	8.09835	9.42176
16900	13.3736	8.9979	6.89441	8.42155
17000	12.6485	8.33647	6.7506	6.08914
17100	12.2656	8.4616	6.38812	7.63553
17200	13.7167	8.01853	7.1455	4.95831
17300	13.121	8.19731	8.63259	4.18106
17400	12.4126	7.98643	7.97516	4.18106
17500	12.5636	8.55479	7.81711	5.16675
17600	12.3016	8.58429	9.14854	4.63942
17700	11.4823	8.26082	8.39467	5.69256
17800	11.6801	8.18114	7.94182	4.11765
17900	11.3012	6.3592	7.77969	4.28252
18000	11.9351	6.11921	6.49277	3.59789
18100	11.6773	6.36524	4.32601	3.56738
18200	11.3986	7.42399	5.15621	4.5846
18300	11.394	8.37196	4.13552	4.75419
18400	12.0885	10.9309	4.02856	5.36926
18500	11.5309	11.7931	5.20581	4.86267
18600	12.9919	12.3323	6.22183	4.65458
18700	12.9702	12.5848	6.00447	3.6978
18800	13.7778	12.1928	6.87003	4.83429
18900	14.2607	9.85782	6.7783	5.45969
19000	15.0211	9.25869	6.05697	5.42368
19100	14.3511	8.77439	5.53807	4.55841
19200	15.1342	7.22524	4.91174	4.35864
19300	14.2203	6.61734	5.51172	6.22866
19400	14.12	7.77424	8.02287	6.70897
19500	14.5899	7.75405	8.56745	8.33052
19600	15.0378	7.66503	9.28078	9.86031
19700	13.9952	9.82284	10.0589	11.7081
19800	13.857	10.8062	8.70826	9.51018
19900	13.8082	10.7279	7.21891	9.09864
20000	14.0197	11.6171	5.64863	8.52727
20100	14.1709	12.4825	5.71169	7.98823
20200	15.0516	12.0791	5.9856	6.72736
20300	14.7829	9.8652	6.72156	7.3529
20400	15.0196	10.6947	7.23811	5.99829
20500	14.7164	10.6324	8.11543	5.12808
20600	15.2477	8.76151	9.34041	5.67707
20700	14.7701	9.12336	8.76161	5.21517
20800	14.8832	10.8899	9.1948	4.1627
20900	14.2184	10.0682	8.73093	5.17187
21000	14.0863	9.06213	10.1068	7.15088
21100	13.0018	10.7097	9.46412	7.588
21200	14.3274	9.51611	10.3539	7.46664
21300	14.6602	8.78045	10.0497	8.4305
21400	14.1591	9.44842	10.4292	7.30184
21500	13.2286	11.1503	8.94263	6.53292
21600	13.411	12.3507	9.16472	6.43145
21700	13.2706	13.1861	8.48241	6.57983
21800	13.3777	13.5708	8.06811	5.96553
21900	14.8984	11.68	6.39728	7.73412
22000	16.0608	9.83281	8.47485	7.28264
22100	16.9883	9.16478	8.36258	7.04493
22200	16.3539	10.2227	8.78224	7.2872
22300	16.0873	10.1888	7.97121	7.60825
22400	15.1406	12.8612	9.18485	8.06216
22500	15.1489	14.2718	7.19928	8.23315
22600	14.3928	13.1877	8.08259	7.79549
22700	15.103	10.9547	6.7123	7.22387
22800	14.4136	11.0089	7.77746	6.90367
22900	14.3794	9.94027	7.63275	6.11607
23000	14.1504	8.26263	8.3918	5.33812
23100	15.1316	8.99954	7.03669	6.13467
23200	14.1957	12.2167	7.99677	6.5915
23300	16.261	12.6568	9.14579	6.39506
23400	16.849	13.0043	8.77606	5.72871
23500	16.8665	13.9909	8.69735	6.58847
23600	16.3483	13.2555	8.59208	6.10699
23700	16.6963	11.3006	8.52663	6.25621
23800	17.0612	10.2752	6.79309	6.53737
23900	16.7645	10.6167	7.87048	7.36277
24000	15.6498	11.089	7.99544	7.20118
24100	14.382	12.1488	8.64121	7.45271
24200	15.0407	12.1521	9.03706	7.236
24300	14.3077	12.8994	9.93734	6.59272
24400	14.3172	13.4629	9.22233	7.07321
24500	15.105	13.4079	9.12754	5.48013
24600	16.1668	13.6578	8.11597	5.51551
24700	16.2071	13.3165	7.96752	7.1873
24800	16.1453	12.6999	9.12339	8.72441
24900	16.6936	12.302	8.54132	8.02372
25000	15.7362	12.7387	8.99452	8.97111
25100	16.4771	11.0348	10.2838	7.58764
25200	16.3193	10.4076	10.9411	6.44873
25300	16.3765	11.147	10.0915	6.30163
25400	17.1402	10.5279	10.8589	6.23166
25500	18.4441	11.054	10.6875	6.42525
25600	19.4335	11.0707	9.94737	7.55474
25700	19.4296	12.6734	9.74006	7.34935
25800	18.8973	13.308	8.30169	6.47217
25900	18.6208	14.031	8.25474	6.63662
26000	17.9273	12.712	8.30139	6.4417
26100	15.8257	15.0083	8.51052	6.43692
26200	16.9173	14.8547	7.85261	6.64411
26300	17.4953	15.579	8.79786	7.2612
26400	16.4875	14.3207	10.5716	7.56504
26500	17.3788	15.9511	10.6411	8.86251
26600	17.4078	14.8117	10.3123	9.59387
26700	16.0553	15.2846	11.476	9.32333
26800	16.0996	14.6461	11.4679	10.6908
26900	15.9821	15.6101	10.1865	11.2885
27000	16.5416	15.9574	9.20352	11.1625
27100	17.0815	15.1605	8.49493	11.9164
27200	16.5433	16.8371	9.4865	13.1437
27300	17.3554	18.0329	11.118	11.4861
27400	16.7686	16.8088	10.9818	10.5215
27500	15.5981	16.3412	12.3935	10.1474
27600	15.0776	17.0966	14.8094	9.57609
27700	17.3344	14.8701	12.9053	9.02921
27800	16.6531	14.9459	11.1836	8.62843
27900	18.8843	16.5498	11.4135	8.63611
28000	19.3666	16.4583	10.7889	8.90054
28100	20.5975	17.2252	9.7721	8.09533
28200	20.0534	16.8654	9.71831	8.13149
28300	21.0701	15.647	9.11034	10.0168
28400	21.0873	14.5923	9.30179	10.24
28500	21.9727	13.6685	9.50646	10.1216
28600	22.177	12.7039	8.8577	9.98104
28700	21.9571	13.6079	9.75698	9.31911
28800	20.3664	13.4837	10.9658	8.70353
28900	19.5679	13.1688	11.1311	9.85451
29000	18.6881	14.589	12.5435	10.1629
29100	18.3908	15.3879	13.3603	10.1459
29200	17.7396	14.4076	11.9397	10.3577
29300	18.049	14.9346	10.9722	10.3345
29400	17.2776	15.7684	9.81736	9.25494
29500	17.306	14.365	9.00631	9.47615
29600	17.0044	15.6469	7.75218	9.89125
29700	17.6739	16.5711	9.59787	10.7397
29800	18.1416	16.1937	10.9583	10.4646
29900	18.6526	16.8323	12.081	10.1943
30000	19.7479	17.4946	12.4751	10.1879
30100	19.4276	15.5156	13.0794	9.28642
30200	19.5524	14.5469	12.5688	8.92197
30300	20.2501	14.7149	12.3855	8.31889
30400	20.5636	14.9272	11.0089	9.37041
30500	20.0176	15.6875	10.5661	8.75701
30600	20.9623	16.5458	11.0186	10.2385
30700	20.7894	18.3771	10.4793	11.4639
30800	20.5043	18.2994	10.8419	13.1095
30900	22.1061	18.5935	12.9489	12.9548
31000	22.0704	18.9475	13.1196	13.0336
31100	21.7773	19.0032	14.2562	12.7881
31200	21.4501	18.2833	14.2872	12.3238
31300	22.6387	18.1137	13.82	11.9974
31400	20.7362	16.7758	12.0403	11.6448
31500	20.7897	14.8474	11.3947	12.1615
31600	20.9611	17.0018	9.43583	12.8105
31700	21.4663	14.9342	8.88698	11.8259
31800	20.4241	14.4811	9.15357	11.3578
31900	20.3795	15.1415	9.37146	11.9867
32000	20.4446	16.3411	9.81343	12.1883
32100	20.4301	13.9734	10.8386	10.8754
32200	19.939	16.0177	12.0498	11.3408
32300	19.1238	18.6921	11.03	10.7677
32400	19.2135	20.0925	12.0813	9.98043
32500	20.1353	20.3448	12.0966	9.87636
32600	19.6277	21.1309	10.6468	9.36096
32700	20.2677	21.4802	9.17918	7.82018
32800	21.6662	21.0272	9.57804	8.33429
32900	21.4986	20.0501	7.80976	8.0595
33000	20.7685	20.2811	7.38554	8.59107
33100	21.8604	19.6385	7.57242	9.43391
33200	22.1848	19.7866	8.93841	10.8788
33300	21.721	18.8106	8.77875	10.9793
33400	22.0821	17.429	9.71121	12.3891
33500	21.407	17.6001	9.19648	12.3006
33600	21.181	16.8784	9.34368	12.4169
33700	21.3271	16.6522	9.33728	12.9261
33800	21.6185	16.5037	10.3175	13.4765
33900	22.4008	17.3009	11.2844	13.2694
34000	23.7854	15.6723	11.8083	12.1828
34100	23.9501	16.8869	13.7783	11.8984
34200	23.7397	16.262	15.0975	11.1103
34300	22.8031	16.6272	14.3329	9.87398
34400	22.8101	16.9531	13.5303	9.34153
34500	22.3556	17.6499	14.2588	9.2243
34600	23.1108	16.5053	12.7978	9.07527
34700	22.2962	16.6723	11.6955	9.24268
34800	23.6008	17.2257	13.1521	10.8914
34900	22.7775	16.5587	14.2444	11.4058
35000	22.3822	16.7102	13.9351	11.0244
35100	22.2477	18.9233	14.008	11.0668
35200	22.3693	19.2885	12.778	9.78173
35300	21.7267	17.5309	12.6655	9.63638
35400	22.3302	18.7929	13.4552	9.54174
35500	22.4789	17.781	13.9179	10.2806
35600	22.6171	16.4562	14.8861	10.8448
35700	22.176	15.8676	16.2943	13.1434
35800	22.4663	17.3855	15.8842	12.5359
35900	22.7974	16.844	13.5398	12.7191
36000	22.1052	17.2432	13.4497	12.8122
36100	20.8568	17.1	13.1889	11.4118
36200	22.6267	17.8969	11.8626	11.02
36300	22.0968	16.4625	10.7091	10.5678
36400	22.2815	16.9054	12.5337	9.52243
36500	23.2425	17.5458	11.7657	9.24925
36600	23.401	17.1391	12.2235	9.41318
36700	22.9743	16.2379	13.6121	9.54702
36800	23.9309	16.9272	15.3262	10.6393
36900	23.6115	18.0143	15.7968	12.3945
37000	22.1548	17.7393	15.7362	11.6781
37100	22.4777	18.9172	14.3017	12.7155
37200	22.5692	19.5409	13.3487	13.4671
37300	21.9728	18.6255	13.4028	13.6397
37400	21.8867	17.5558	12.5388	11.8902
37500	22.3435	18.3607	12.927	12.8869
37600	21.9143	19.2777	13.6248	12.9828
37700	21.76	19.592	14.5379	11.7634
37800	22.2673	20.1278	13.9055	10.3571
37900	22.7989	21.2852	12.7805	10.9221
38000	23.5147	21.2305	13.3877	12.3632
38100	24.0872	20.2787	13.759	12.7176
38200	25.584	19.6039	11.7289	13.1329
38300	25.5872	20.6745	9.3269	14.454
38400	26.1564	18.5615	10.4886	15.9609
38500	26.4991	17.8234	9.47091	13.9908
38600	27.3559	17.452	10.0752	13.3546
38700	25.532	17.9517	11.469	12.1809
38800	25.6635	18.2321	13.0311	11.5025
38900	25.2557	20.2183	12.4079	11.1297
39000	25.8034	20.6472	12.9634	12.5265
39100	25.5244	21.4533	12.3349	12.9259
39200	25.7712	21.7225	11.7667	12.8091
39300	25.0944	21.6758	11.9132	12.9997
39400	25.1666	19.6502	12.5962	12.9042
39500	25.038	19.8757	12.064	13.4961
39600	24.7418	18.0861	12.5434	13.2313
39700	24.7953	17.6933	12.538	14.99
39800	25.4445	17.9017	13.2834	14.2143
39900	24.975	18.8044	12.7183	13.4162
40000	25.7338	19.3765	13.6112	11.9698
40100	25.9589	19.3011	13.4571	12.31
40200	26.6876	19.3216	14.0075	12.3478
40300	26.5712	18.6711	14.2651	12.6125
40400	27.5478	18.4755	14.499	13.0093
40500	27.9598	17.2968	14.3143	13.5489
40600	27.9444	18.8021	13.962	13.0249
40700	28.0462	18.2865	15.0465	12.5377
40800	27.2687	18.0751	13.7201	14.0542
40900	27.1853	18.6885	15.5722	13.6807
41000	26.7177	18.7574	16.0839	13.7206
41100	25.9112	18.6247	16.3371	15.4686
41200	25.5849	20.1467	15.4659	16.1249
41300	25.2058	20.3029	16.6885	14.0427
41400	24.2639	19.8192	15.4342	13.6675
41500	22.9381	20.0034	14.9053	13.3681
41600	23.4663	20.1095	14.6556	12.331
41700	24.2094	20.1649	14.7591	10.7216
41800	24.9633	20.3446	14.3678	12.2924
41900	26.6648	20.9539	13.0619	12.803
42000	28.1465	21.241	13.7757	14.5413
42100	29.363	20.2486	14.4866	15.1363
42200	28.5924	19.2563	14.8805	17.005
42300	29.1025	19.6513	15.0994	16.7316
42400	27.527	19.0463	17.0855	16.7876
42500	26.5848	19.3007	15.8833	15.1829
42600	26.4405	21.3245	15.2695	14.1801
42700	27.3002	22.7702	14.9515	12.7734
42800	27.3126	21.9592	14.5367	12.4476
42900	29.2495	22.2332	13.3375	11.8261
43000	30.0384	23.0591	13.6765	12.2227
43100	29.0338	21.4688	12.9571	11.9917
43200	28.0814	19.5922	12.8045	11.7708
43300	28.339	21.1098	13.3249	12.0672
43400	26.3812	21.7062	13.2204	12.5624
43500	26.0837	20.4016	13.3755	12.2702
43600	26.2122	21.445	13.2342	12.5864
43700	26.2225	21.6646	12.295	14.2454
43800	26.7826	20.2943	11.6668	14.3901
43900	27.0441	19.4542	10.9796	15.051
44000	26.8783	22.365	10.3546	15.7497
44100	28.2015	21.6358	11.1451	15.1956
44200	28.8799	21.8323	11.8413	14.3862
44300	28.9898	22.3253	12.7205	13.3427
44400	29.9509	21.2102	13.1673	13.4047
44500	30.4655	18.6184	13.3581	12.5407
44600	28.9763	19.0496	13.0732	13.4445
44700	28.652	20.6859	12.7409	13.5837
44800	28.8648	20.6404	13.4978	14.4665
44900	28.8282	22.8276	14.5403	14.4797
45000	28.6385	24.4734	15.5805	15.2158
45100	28.603	24.5663	16.9883	15.8288
45200	28.3891	23.1106	18.1265	16.1613
45300	27.4528	23.3136	17.8709	15.0612
45400	27.6032	23.3588	17.0715	14.199
45500	26.5615	19.7003	16.5756	13.1296
45600	26.8869	19.4436	16.3663	13.134
45700	26.9292	21.2508	15.2569	12.624
45800	26.9068	22.6138	13.8335	14.1253
45900	26.657	21.2643	13.3358	15.136
46000	27.6407	25.0685	13.229	15.9838
46100	28.1207	24.8146	13.1032	14.7775
46200	28.671	23.9997	13.373	15.0758
46300	28.8422	21.5327	14.0672	14.7255
46400	29.2898	22.0436	16.1984	14.6773
46500	28.2577	21.0855	16.1215	14.1054
46600	27.8972	23.5921	15.719	15.473
46700	27.7954	23.0324	15.7665	15.83
46800	28.7104	24.9346	15.1119	16.3705
46900	28.7254	25.3295	13.7156	15.9392
47000	29.8027	25.6849	12.2879	16.1806
47100	29.3153	24.6287	11.2666	15.4585
47200	28.7421	25.1909	11.892	13.6126
47300	30.0009	26.0435	13.7051	13.1469
47400	29.7647	26.9521	13.5627	13.1611
47500	29.7575	25.4654	15.3041	13.9383
47600	30.5871	24.3048	15.7419	14.7176
47700	31.386	23.5647	15.2344	16.706
47800	30.6225	21.8863	14.7458	17.5876
47900	30.5218	23.4424	14.0185	17.9133
48000	30.4816	24.0411	14.36	17.0786
48100	30.9776	24.7131	14.584	16.2797
48200	31.2903	25.5833	15.0859	15.6868
48300	29.3392	24.8183	14.6464	14.9568
48400	29.8508	22.2113	15.3846	15.1464
48500	29.434	21.758	13.4822	14.7033
48600	29.0854	20.6825	13.5474	14.8252
48700	28.5705	19.7091	13.2814	14.7221
48800	28.7848	21.1145	14.8149	14.7563
48900	27.8357	20.9923	15.2488	14.6918
49000	28.0123	21.2896	17.2789	15.9828
49100	28.6012	23.2821	16.9057	16.5843
49200	27.4826	24.2349	16.6871	17.5067
49300	27.7122	23.7644	14.5187	17.2921
49400	27.5137	25.8826	14.8722	16.3281
49500	27.2315	25.9784	14.8093	15.7463
49600	26.1253	26.227	14.677	15.5512
49700	27.7057	24.5026	14.8259	14.311
49800	29.7659	25.1995	14.6094	14.58
49900	30.086	22.4226	13.7522	14.7007
50000	29.7942	22.4498	13.7156	14.9167
50100	30.8149	22.2235	14.185	16.2596
50200	29.292	24.1303	15.3167	17.0632
50300	28.3798	24.2454	15.852	17.9962
50400	29.2843	26.7585	17.0666	19.8142
50500	30.2221	28.7253	16.5988	19.9616
50600	30.2513	27.29	17.4768	17.7244
50700	30.9325	26.6951	16.4102	18.7786
50800	29.8948	27.0926	17.419	18.459
50900	29.0283	25.6545	16.14	16.2546
51000	29.3272	23.3459	16.5213	16.6108
51100	28.8462	23.9429	15.4332	18.4145
51200	30.1079	23.7958	14.887	16.8736
51300	31.5869	23.1689	13.9203	15.8505
51400	32.5777	22.2232	14.0176	16.6614
51500	31.357	22.9116	13.5091	17.5949
51600	31.0568	22.95	12.1905	16.7886
51700	30.8511	22.83	13.3527	18.3996
51800	30.3793	22.5161	12.9113	18.1199
51900	29.6507	23.3529	12.7313	18.5626
52000	30.963	23.5747	13.1797	17.0689
52100	32.09	23.9584	14.4937	17.557
52200	31.001	25.3064	14.3205	16.7596
52300	30.6412	26.3717	15.3114	18.8599
52400	30.8099	26.5461	17.415	19.7182
52500	30.9468	26.5706	18.1605	20.6371
52600	30.5914	24.622	19.0237	20.3734
52700	31.0181	23.1728	19.0837	19.1504
52800	31.7211	23.6725	18.4123	18.2326
52900	31.7591	24.8799	17.4693	16.4051
53000	31.2976	24.7848	16.5009	16.4748
53100	31.8308	26.5906	16.1017	17.0129
53200	33.622	27.1431	16.313	17.631
53300	32.7141	25.6659	15.6362	17.8759
53400	33.5371	24.5069	15.4547	18.4574
53500	34.1842	24.8538	16.3865	18.3313
53600	33.2365	25.1249	16.9677	18.2027
53700	32.5912	25.2837	18.051	17.7856
53800	33.7788	25.3238	19.0262	16.8622
53900	33.1384	25.2735	17.2962	16.8228
54000	31.9669	26.0583	17.3115	17.0959
54100	31.4724	24.7075	16.5008	15.271
54200	30.7076	23.6246	14.8624	14.9315
54300	29.9217	23.0866	15.6261	14.7107
54400	29.3656	23.2764	17.2353	13.5846
54500	31.1828	23.8472	16.3512	12.4609
54600	32.0093	23.4468	16.5716	13.5041
54700	32.4222	24.0187	17.1273	15.1953
54800	32.596	26.1451	16.5075	17.117
54900	33.5053	27.862	15.9968	18.3017
55000	33.0223	27.0253	14.7531	18.9389
55100	32.7625	28.3165	14.4737	19.1569
55200	33.032	29.4203	13.6336	18.995
55300	32.5555	27.8449	14.1206	18.6728
55400	31.6135	25.7315	14.4666	20.0878
55500	31.3982	25.6933	16.5694	19.3924
55600	31.6748	25.9815	16.6868	20.5985
55700	31.8649	25.3159	18.078	20.4493
55800	32.5539	25.6072	17.4218	19.707
55900	32.7915	26.7287	17.5019	17.8971
56000	32.9845	25.8329	17.3949	18.516
56100	33.0334	26.5957	17.9321	18.2326
56200	31.8638	25.9184	17.1029	17.2892
56300	31.9472	26.8527	16.9926	17.498
56400	32.0667	27.2359	17.0385	18.5893
56500	31.736	27.6954	15.9029	18.4279
56600	31.5073	27.2603	16.3534	17.4485
56700	31.9788	28.785	15.8821	18.052
56800	31.0374	28.5853	15.4465	18.1927
56900	31.2569	28.8333	14.8846	18.1111
57000	31.9961	29.5482	14.6541	18.0697
57100	32.2336	29.2843	14.7195	17.7489
57200	32.5887	28.2186	15.9942	16.1116
57300	31.6965	28.8985	17.223	15.4381
57400	30.2148	27.7263	17.715	15.5935
57500	29.4975	28.7957	17.4945	15.1826
57600	30.4492	29.1307	16.3774	16.8999
57700	30.2965	29.6875	15.3118	18.2694
57800	30.9845	29.3576	15.2841	18.3959
57900	32.4377	29.6211	15.8551	18.6198
58000	32.5449	28.1695	17.7371	19.4654
58100	31.6606	29.577	18.9554	18.2421
58200	30.5151	31.0061	21.391	19.2169
58300	30.6371	30.7729	20.6692	19.6813
58400	30.2726	29.8532	20.1179	18.5736
58500	30.7736	29.3804	19.8937	17.205
58600	30.0376	27.9482	20.6031	18.1268
58700	31.6056	27.7464	19.1929	17.8256
58800	32.3403	28.7942	19.5852	19.0464
58900	31.9123	30.6172	20.0253	20.191
59000	30.2007	32.8132	19.3919	21.2867
59100	30.8609	32.7641	18.6599	21.0244
59200	29.3456	32.21	18.4253	20.9456
59300	29.1956	30.414	17.8418	19.4818
59400	30.7565	30.5451	18.6277	19.4336
59500	31.1842	28.7386	18.9405	18.8841
59600	32.3761	28.0755	17.5436	19.2988
59700	33.1585	27.881	18.2362	20.1532
59800	32.0587	29.2299	18.8035	19.8576
59900	30.944	28.0677	17.1013	20.6752
60000	31.2055	30.183	17.5477	21.8395
60100	29.3716	31.0886	17.6096	20.824
60200	30.1098	31.243	16.6916	19.2932
60300	30.1728	30.9775	17.2315	20.6066
60400	30.6725	32.4271	17.3847	18.702
60500	31.3109	29.2317	17.71	18.6563
60600	30.5894	27.8612	19.5695	19.1684
60700	29.4014	28.5826	19.2913	20.0754
60800	29.6659	28.3459	19.514	19.6944
60900	29.0688	28.8538	20.6797	20.1809
61000	28.8483	30.6793	20.4082	20.5519
61100	29.9705	31.0668	20.3856	21.5178
61200	29.0009	29.8503	21.0103	20.7383
61300	29.677	29.1024	19.5458	20.857
61400	30.4149	28.0122	17.9934	21.6861
61500	30.9714	27.2426	17.411	20.7533
61600	29.739	27.7195	17.4647	19.535
61700	30.6163	28.5109	17.4229	20.7631
61800	30.6271	29.7164	18.39	20.6532
61900	29.5582	29.8832	18.9329	19.408
62000	27.5629	30.4678	19.4489	19.1365
62100	27.9963	31.3092	19.0101	18.1518
62200	27.7398	32.1849	20.4737	18.03
62300	27.0721	32.1334	21.4259	17.7803
62400	26.9423	31.6263	21.9008	18.2234
62500	26.7183	30.4768	21.9083	19.4015
62600	27.3484	30.3199	22.1995	19.4027
62700	27.6741	28.5496	21.0492	19.5748
62800	27.8063	27.7975	20.2656	19.7837
62900	28.1295	28.0542	21.7536	19.9713
63000	29.7665	27.9437	21.5192	19.1782
63100	29.1496	27.9639	22.0178	20.5444
63200	29.4269	28.2429	23.2781	19.9238
63300	29.7727	28.3468	24.4326	20.3217
63400	30.3552	27.3987	21.9373	21.4681
63500	29.2864	28.1909	22.3334	21.881
63600	28.3166	28.1222	21.7047	20.4948
63700	27.4796	28.2248	20.0628	21.0151
63800	26.6124	30.8932	19.2261	19.8346
63900	25.2993	33.0053	20.4453	17.6276
64000	25.9794	34.1945	19.9855	16.513
64100	26.479	33.6892	20.2716	18.0737
64200	26.3661	34.6345	20.875	18.4228
64300	26.2694	31.9383	21.5674	19.0713
64400	26.798	29.3887	21.8067	21.0613
64500	26.0741	29.8369	22.9148	22.2607
64600	26.5851	30.6086	21.817	20.342
64700	27.9385	31.2676	21.3455	18.9504
64800	28.2495	31.4977	21.2007	18.493
64900	27.5444	32.9338	21.2535	17.8105
65000	27.4497	32.1058	20.0141	19.3521
65100	27.6314	32.5893	21.1756	20.945
65200	27.4351	31.3662	22.2505	21.0622
65300	27.7743	30.232	22.3379	20.6642
65400	28.8872	30.4055	22.8185	20.2212
65500	29.6072	29.994	23.6428	18.6131
65600	30.2293	30.0447	23.9805	17.4629
65700	29.8901	30.504	22.4546	17.8515
65800	30.4323	31.6868	21.7768	17.7608
65900	30.066	30.1649	21.7766	18.0863
66000	29.169	30.7902	21.71	16.3662
66100	28.2369	30.6326	21.1136	17.5201
66200	27.329	30.2506	20.9067	17.9071
66300	26.6331	30.4648	21.3304	18.6725
66400	27.4712	33.0109	20.4565	18.2843
66500	27.1843	31.6419	21.4954	20.3438
66600	28.0582	32.294	21.4005	21.9419
66700	29.8571	31.2739	22.6399	21.8106
66800	29.9174	30.528	23.5099	22.1942
66900	30.685	28.5927	24.2979	22.1549
67000	31.4375	29.3496	22.9976	20.974
67100	31.0021	26.9066	23.7259	18.8989
67200	29.6105	28.3261	24.4242	18.9725
67300	29.6601	28.8858	24.5181	18.7591
67400	27.7204	31.1911	25.0572	20.9346
67500	28.6734	32.1726	24.4319	22.0954
67600	29.7577	34.3262	22.995	21.8736
67700	30.8633	34.8969	22.8672	21.9184
67800	31.4653	35.5041	21.8776	21.7252
67900	32.0146	34.7331	22.3124	19.6417
68000	32.1046	34.7093	24.5665	19.5762
68100	31.5624	33.9705	26.4339	20.5289
68200	31.6849	34.3903	25.5101	20.4478
68300	32.6009	34.7968	25.5213	22.0281
68400	33.396	34.3084	24.9273	22.2939
68500	32.4985	33.6889	22.911	22.7336
68600	32.5093	33.3834	21.8313	21.8019
68700	31.844	34.7916	21.941	22.0614
68800	32.0854	33.3572	22.2118	21.5444
68900	31.9759	33.6365	22.0959	21.7673
69000	31.9546	32.0119	22.4121	22.1735
69100	32.419	32.9134	23.2521	23.1608
69200	33.1389	30.0937	23.1749	23.4203
69300	32.8757	32.3955	23.5164	22.3995
69400	33.1809	34.3434	22.1872	22.4678
69500	34.1452	36.7008	22.5908	21.5361
69600	33.6955	35.1839	22.6657	20.776
69700	33.8513	36.6804	24.1375	19.8318
69800	32.6727	35.0037	24.442	18.6339
69900	33.2988	33.1912	24.6155	17.9636
70000	33.7768	33.0552	26.0676	17.1281
70100	34.872	34.5438	25.6241	17.5726
70200	34.9917	33.468	24.9302	18.0149
70300	36.8503	33.8838	25.1392	19.5606
70400	36.0165	34.7788	26.1879	20.2209
70500	36.3496	33.504	26.2767	21.1564
70600	35.9531	34.784	25.2428	20.6559
70700	36.1691	35.1668	25.153	19.8156
70800	35.9418	34.7709	24.6809	19.5109
70900	36.9262	35.2894	24.178	19.0522
71000	38.1372	36.8526	22.3802	18.2052
71100	38.8153	34.1988	23.5686	20.0081
71200	39.429	34.7833	23.3459	21.1036
71300	39.9254	34.3777	23.0554	22.3422
71400	39.6198	32.9536	23.6652	22.5076
71500	38.8294	32.2441	25.3826	22.5876
71600	38.9188	34.3487	25.2518	21.9546
71700	39.4871	32.454	25.8031	20.7395
71800	37.8148	33.1232	25.0875	21.4148
71900	38.0498	35.2381	26.4279	22.3381
72000	38.3644	35.3115	26.481	23.7096
72100	38.8816	34.8152	27.0772	23.7281
72200	38.3229	36.24	26.789	25.0288
72300	38.9171	36.7419	29.0512	23.8237
72400	39.842	34.6232	29.1534	22.9687
72500	39.6981	35.0297	28.8285	23.0693
72600	39.9959	34.5907	29.537	23.8261
72700	40.5957	34.4916	28.5765	23.2497
72800	40.6745	35.2726	26.6317	22.5468
72900	39.2636	35.1159	26.9355	22.2222
73000	40.2104	35.6727	26.319	21.1446
73100	39.3526	36.3604	25.1743	20.0086
73200	39.0125	35.7469	25.2988	19.8813
73300	39.9616	33.8362	27.7663	19.6108
73400	40.9364	34.8166	27.0047	20.8927
73500	40.4655	34.019	27.7742	21.5645
73600	41.4649	32.3358	27.3744	21.8349
73700	41.4243	34.0863	28.046	22.2824
73800	42.3666	34.361	25.5125	22.919
73900	43.6862	33.2704	25.01	22.2713
74000	43.5372	33.4176	23.9604	20.9534
74100	42.6342	35.1809	24.8951	19.6451
74200	43.6503	33.3857	25.6816	20.0623
74300	43.5882	34.2384	27.6328	19.7419
74400	42.0334	34.3047	27.9585	21.1206
74500	41.7375	33.9366	28.9876	22.0929
74600	42.0201	33.5714	27.4047	23.7573
74700	41.9199	32.3958	28.0238	22.9016
74800	42.3971	32.9426	27.084	24.0661
74900	42.4792	33.6356	26.2112	22.9167
75000	43.0735	33.6429	25.5096	23.4019
75100	43.9695	33.7564	26.3509	22.4401
75200	43.6362	36.7205	25.003	22.8284
75300	42.4999	37.6446	24.6272	22.2898
75400	43.617	36.5619	25.0626	23.2784
75500	44.2287	36.795	25.015	23.915
75600	43.5036	37.1906	25.2563	24.1938
75700	43.493	35.831	26.1157	23.5073
75800	42.9911	33.8442	27.1582	23.7682
75900	42.8132	33.609	27.3841	22.2915
76000	41.7595	33.4093	28.8592	21.1017
76100	42.2213	32.5959	30.235	20.6296
76200	41.5635	33.2722	29.7701	20.874
76300	41.2862	32.9585	29.3364	19.6159
76400	41.5526	33.7352	29.2389	19.8422
76500	42.6271	34.9103	29.1247	20.6121
76600	41.9648	36.6376	28.46	21.503
76700	42.8362	36.534	28.7714	23.0485
76800	44.2137	37.3107	29.1385	23.9252
76900	43.1361	38.7222	29.5516	24.3141
77000	42.2674	37.5258	27.7472	25.2671
77100	43.2205	35.9116	27.7735	25.0848
77200	43.4268	35.502	27.7526	24.3139
77300	42.9811	36.145	26.5198	24.147
77400	44.6155	35.4775	26.9588	24.9263
77500	45.0751	35.1833	27.5485	23.8231
77600	44.6207	35.1953	27.1191	23.902
77700	43.3193	35.5526	26.8816	23.891
77800	44.3844	35.5591	28.2812	25.5399
77900	43.2677	34.4676	27.1783	25.5851
78000	43.5773	34.4553	28.5894	25.1195
78100	42.6354	35.7536	29.9665	24.0423
78200	43.0413	36.2619	32.41	23.9727
78300	41.3105	36.3069	31.227	23.3168
78400	40.7521	37.7355	29.8844	22.7079
78500	40.6544	38.8447	28.7466	23.0891
78600	40.5434	37.4204	27.4063	23.408
78700	41.3237	36.1209	24.8718	24.1575
78800	42.5196	35.8071	23.7529	22.6282
78900	44.0451	35.3793	25.7339	22.4205
79000	43.1337	35.2278	25.7147	22.4823
79100	43.6592	35.6499	26.6311	23.2603
79200	43.7343	36.5833	26.5915	23.0202
79300	41.7795	35.7221	28.8349	24.1109
79400	40.7042	35.2353	28.5654	24.4701
79500	41.9434	35.4331	28.2125	25.5166
79600	42.0689	35.3434	26.4805	26.3032
79700	41.3451	34.7764	28.1988	25.9344
79800	42.7908	35.1032	27.8741	26.9571
79900	42.954	35.4647	28.6173	26.4245
80000	41.524	34.4679	29.1348	25.4465
80100	41.6659	34.3726	30.4023	25.2698
80200	41.9394	35.3249	29.0391	25.5898
80300	42.5405	36.9475	28.8866	24.6988
80400	43.1969	37.6684	28.4757	24.0726
80500	44.1495	39.3028	29.2621	23.6784
80600	45.54	39.8818	28.6848	21.9004
80700	45.9382	38.843	28.207	22.1634
80800	44.8189	37.9048	28.409	21.1833
80900	44.8542	36.9892	28.4516	22.2125
81000	44.3963	36.7715	25.8412	21.5899
81100	44.0795	37.1084	26.4837	22.9073
81200	44.0686	38.3716	28.5372	21.3287
81300	44.7466	38.8064	29.4635	21.5142
81400	44.1	39.899	28.1804	22.7905
81500	43.8746	41.4873	29.5182	23.4274
81600	42.6188	42.2513	27.6681	23.9846
81700	42.1386	41.936	27.5917	24.0961
81800	42.5504	42.6885	26.3488	23.9786
81900	42.3114	41.4801	27.3644	21.8662
82000	43.9321	39.5807	29.0475	22.5524
82100	43.6741	37.8155	30.5249	21.6279
82200	44.1932	37.37	28.8841	21.3806
82300	44.1935	36.2913	28.1418	21.0732
82400	44.4391	36.1921	28.5609	20.9205
82500	43.9906	36.7943	28.0726	21.0931
82600	46.2389	37.229	28.9151	19.9945
82700	45.9463	37.9153	28.1716	20.5416
82800	46.6811	37.6874	28.7928	20.9556
82900	46.7157	38.8195	29.3613	23.147
83000	46.3926	38.8315	28.315	21.8323
83100	45.6359	38.2933	28.185	22.8023
83200	47.033	38.1235	29.9181	23.4477
83300	47.1188	37.7073	29.3591	23.9633
83400	47.149	36.9906	28.0769	22.943
83500	47.2034	36.9871	29.3275	23.8956
83600	46.9743	36.4252	28.5762	24.165
83700	45.7883	35.3441	27.4891	24.7471
83800	45.2984	35.6605	28.2725	23.7178
83900	45.0669	37.0897	28.5641	23.4364
84000	45.6047	34.881	27.6426	22.5491
84100	46.0545	37.5587	27.7928	22.4853
84200	46.3962	38.8263	28.6549	23.3364
84300	46.5667	39.6246	28.2937	24.4229
84400	47.5117	39.6717	28.2745	23.6056
84500	46.7331	39.871	29.6983	23.134
84600	45.5839	39.0036	30.5068	22.0892
84700	47.0528	39.6032	30.8804	20.1492
84800	46.8751	40.0917	31.8456	20.7607
84900	46.7929	38.646	33.3351	22.8001
85000	46.9676	40.7143	33.1407	24.4232
85100	48.0372	39.3897	32.8841	25.8617
85200	46.1028	37.9533	32.8946	25.7564
85300	46.1641	37.5127	32.4335	25.0693
85400	46.1941	38.9802	31.0397	23.5282
85500	45.6994	37.7734	30.3354	22.6271
85600	45.7474	39.2171	29.5513	22.013
85700	47.3172	38.7337	28.7011	21.0398
85800	46.1456	38.0423	28.3241	22.3381
85900	45.9109	38.0918	28.642	22.9533
86000	45.8046	38.1896	27.6358	22.7659
86100	45.0543	37.9012	27.3812	23.4607
86200	43.8947	38.4976	27.7676	25.6513
86300	45.2564	38.7326	26.7111	23.875
86400	45.9652	38.5952	26.9085	24.0619
86500	47.7034	38.1775	27.9976	24.7193
86600	48.1107	38.0868	27.8965	23.7991
86700	48.2366	37.5113	27.1801	21.9131
86800	47.8387	36.2404	28.758	23.3966
86900	47.746	36.3077	29.0892	21.9578
87000	46.9425	38.1513	28.4715	20.879
87100	46.6884	38.3831	28.758	21.4336
87200	46.7838	39.2691	29.8075	22.1405
87300	46.5536	39.5338	29.8736	21.5625
87400	45.4915	38.0456	28.7588	22.7319
87500	46.1875	37.2504	29.1634	23.5244
87600	45.6717	37.064	30.2235	23.1104
87700	45.7354	36.939	30.1188	24.4035
87800	46.2401	38.8791	30.5206	24.2681
87900	47.4042	38.8238	30.7228	25.6792
88000	45.8735	39.2312	30.7079	25.8303
88100	45.7787	39.4459	29.2189	26.0368
88200	46.7707	40.498	30.5641	26.0514
88300	46.6806	39.582	30.1915	26.4022
88400	45.6568	39.2762	31.2498	23.6111
88500	45.683	39.444	31.534	23.0443
88600	47.2119	37.9332	33.0012	23.9521
88700	46.2824	36.6268	33.4318	23.9571
88800	45.7668	35.7153	34.1659	23.1293
88900	46.2107	35.6405	34.1634	25.1039
89000	47.1395	34.5172	32.843	26.0213
89100	45.7601	34.8948	31.7322	25.7927
89200	46.364	34.0038	29.8361	25.1758
89300	46.4995	33.1971	28.6032	26.0705
89400	45.7192	34.2331	27.577	25.2175
89500	45.1799	33.8923	28.2237	24.1798
89600	46.6299	34.0372	29.2074	24.8091
89700	44.4234	35.7304	29.7227	24.8573
89800	44.6801	37.4853	29.7063	25.2174
89900	46.6291	38.5141	29.0103	24.6648
90000	47.937	39.6069	29.3802	25.993
90100	47.131	41.2026	30.0163	25.2269
90200	49.1509	41.4912	29.6784	23.7681
90300	49.0873	42.0334	30.2298	22.8765
90400	49.2343	41.9842	31.666	23.556
90500	48.5209	42.2801	32.5932	22.8777
90600	48.9543	40.3196	32.4337	22.6977
90700	48.2426	39.5292	32.6481	23.1323
90800	48.417	38.2097	32.9705	21.6989
90900	47.3157	37.8213	32.7724	22.3509
91000	49.1921	39.1345	32.9346	21.7855
91100	49.2001	41.4345	32.2615	22.2214
91200	49.3915	40.7511	31.9706	23.0464
91300	48.7477	39.9415	30.785	23.9417
91400	49.8317	38.9806	30.6516	23.3494
91500	49.3296	37.0667	30.891	24.9412
91600	49.9125	35.9405	32.2155	24.0177
91700	50.8319	37.913	31.4993	24.0298
91800	52.6403	38.6949	33.0311	24.755
91900	51.117	39.0253	33.4474	24.6222
92000	49.2889	38.8543	32.8002	23.6224
92100	48.6047	37.9762	31.41	23.689
92200	47.4282	37.1619	33.5161	24.165
92300	46.8767	38.6242	33.505	24.1301
92400	47.8891	37.2912	33.2865	24.8635
92500	47.3669	37.564	33.7081	26.0142
92600	48.3569	37.8512	33.6274	25.4197
92700	48.4968	37.816	32.4167	25.6921
92800	47.9778	36.9683	31.1511	26.0768
92900	47.8731	38.2261	30.57	25.1907
93000	48.0071	38.8309	31.2038	23.9101
93100	46.776	37.7958	30.6938	25.5631
93200	46.8559	36.9324	30.1213	24.5342
93300	47.3357	36.7954	30.4156	23.8712
93400	48.0803	35.2292	30.5979	24.2494
93500	48.6741	33.4542	29.2078	23.6752
93600	49.6456	33.11	31.2805	23.5158
93700	49.6813	33.336	32.0113	23.7775
93800	49.9635	33.1585	33.2303	23.9751
93900	49.4907	34.7308	34.1517	24.9623
94000	50.1566	36.356	34.7135	25.5229
94100	50.3685	37.8161	32.7154	23.5744
94200	50.9237	37.7378	31.7056	24.399
94300	50.0994	37.3592	30.406	24.1701
94400	50.3819	36.4963	29.5579	23.2918
94500	51.0442	34.9651	29.4499	23.096
94600	50.7128	36.1889	29.7872	25.2828
94700	50.6677	35.5465	30.2236	23.7954
94800	51.0774	35.0738	31.0885	24.8755
94900	50.0102	35.8675	31.625	25.1094
95000	49.2293	36.5978	32.8405	26.1046
95100	49.0098	34.7139	33.4152	25.5303
95200	48.888	34.9473	34.6964	25.5498
95300	48.9048	35.5873	34.363	25.0461
95400	49.7984	36.5069	33.8821	24.6435
95500	51.1841	35.1704	32.4768	23.8634
95600	50.6628	34.2789	30.9272	22.9551
95700	50.854	34.9089	29.3082	24.2367
95800	51.517	35.3375	29.3051	24.398
95900	51.7735	33.2485	29.6904	24.6086
96000	51.1717	33.224	30.4563	26.4592
96100	51.6724	35.5305	31.1903	27.2618
96200	51.9937	34.8903	33.7665	25.9647
96300	51.1395	35.4533	34.5361	25.4808
96400	50.9633	36.6148	34.3804	24.0974
96500	49.9491	39.1437	33.5194	22.3455
96600	50.0824	37.4753	34.3595	22.4037
96700	50.1299	37.0946	32.1742	23.3852
96800	50.4864	35.968	31.7082	22.8747
96900	51.2084	34.6317	32.3346	25.0464
97000	52.3716	33.3444	32.9323	25.3123
97100	52.0206	34.4863	33.4175	26.0989
97200	51.405	34.0231	33.6724	26.667
97300	50.6335	33.2592	33.6845	27.2101
97400	50.66	33.618	33.3096	26.4913
97500	49.5084	33.7329	32.3017	26.3379
97600	49.6086	32.3261	32.5113	26.222
97700	50.134	32.2912	34.2383	25.7364
97800	50.2893	34.6058	34.0504	25.1392
97900	49.4223	34.6335	32.879	25.661
98000	50.3571	33.3919	34.0058	25.2932
98100	50.1698	34.8416	32.7574	24.7926
98200	50.8031	35.5714	30.9501	25.6809
98300	51.0062	33.176	30.5081	26.552
98400	50.4277	31.6675	31.6802	25.1799
98500	49.8277	31.6704	32.1614	25.6655
98600	50.8838	29.5447	32.8581	26.1614
98700	50.5953	28.665	32.0987	25.8021
98800	49.8905	28.5164	32.6286	26.2076
98900	51.1814	28.7558	32.4358	29.3639
99000	51.1117	28.0673	30.9589	28.1382
99100	50.7811	29.3596	31.8499	27.7359
99200	49.7966	28.282	32.7903	26.8871
99300	50.4852	29.6343	32.9316	27.3599
99400	50.1115	30.1442	33.2752	26.0336
99500	50.0552	30.3688	33.2931	27.2329
99600	49.5745	31.8439	32.1016	26.613
99700	49.9679	33	32.0748	25.9437
99800	50.5354	32.5458	32.2191	25.3347
99900	50.0465	34.0878	32.7415	24.3446
100000	50.9157	34.4392	33.568	24.568
100100	51.3471	32.7376	34.9895	25.3107
100200	51.4362	34.3813	34.9089	26.5387
100300	51.0762	33.8954	35.5383	25.1168
100400	52.0154	32.7377	35.6768	26.6929
100500	51.8237	33.6147	35.0042	26.9835
100600	52.0591	34.201	34.0499	27.6251
100700	52.2149	32.8317	34.2485	27.5421
100800	52.9095	33.4627	33.0687	28.5022
100900	52.0215	34.6909	32.4436	28.2256
101000	51.9475	35.4864	32.516	27.7547
101100	51.8713	34.0742	32.0049	26.2347
101200	52.8109	35.6906	32.1582	28.0734
101300	52.6135	35.759	33.4606	27.7077
101400	52.7917	37.0023	34.2776	27.1007
101500	52.8582	35.5176	35.4686	27.3247
101600	53.0483	35.7045	36.1119	28.8871
101700	52.5232	34.9097	36.1271	27.6585
101800	52.8726	33.8376	35.6765	27.6434
101900	52.2395	31.8754	34.7053	27.1438
102000	52.5236	31.5957	34.7144	28.3391
102100	52.6226	32.5822	35.6618	27.8602
102200	52.7534	32.2303	35.1577	28.5349
102300	52.5436	33.5143	35.0193	29.09
102400	53.2188	35.0416	35.2061	28.283
102500	53.4525	36.8771	34.3455	28.1957
102600	53.3014	36.7876	33.374	28.5763
102700	52.7945	36.5593	32.9048	27.7338
102800	53.2876	36.9064	33.2155	28.7517
102900	53.662	36.1935	33.1626	30.0719
103000	53.1824	35.6095	32.4063	29.3335
103100	53.3269	36.276	32.0371	29.3532
103200	53.2592	36.9644	34.7966	30.4681
103300	52.9776	36.5403	35.1276	30.5036
103400	52.5453	34.9842	36.0352	30.2709
103500	52.5633	36.0937	36.5437	29.9897
103600	52.6146	37.4001	38.0047	30.3719
103700	52.2689	38.4475	36.9087	28.755
103800	51.8802	39.0438	36.414	29.2254
103900	52.2327	41.1579	36.3368	29.6626
104000	52.1475	39.7278	36.4506	29.0186
104100	52.3815	39.4108	35.3296	28.2148
104200	53.1767	38.9903	36.0778	27.436
104300	53.0705	39.3252	36.8589	27.2239
104400	53.6978	39.5647	36.607	26.6036
104500	53.9239	38.8294	37.7005	27.2555
104600	53.5702	37.9661	39.335	27.951
104700	53.5545	36.4035	39.0323	29.4993
104800	54.168	36.3259	38.2868	27.7233
104900	52.9928	35.9568	38.6345	28.5985
105000	52.8711	37.6305	38.6621	28.4898
105100	52.9281	39.2164	38.2959	28.4683
105200	52.9142	40.6544	38.4472	29.0795
105300	52.5938	40.5394	38.8224	30.2516
105400	52.9881	40.3636	38.2102	30.1883
105500	53.808	38.8961	37.8472	31.5824
105600	53.9396	38.1072	38.4058	31.5403
105700	54.2723	37.6188	37.151	30.6413
105800	54.5138	38.451	37.0654	31.655
105900	54.7971	37.5398	38.0294	31.5951
106000	54.1261	38.9461	37.7179	30.2179
106100	53.81	37.4771	36.0868	30.4434
106200	53.6422	38.9262	36.8921	30.8903
106300	53.9323	38.0607	36.9849	29.5158
106400	53.8379	39.371	37.1021	29.0083
106500	54.2399	40.0665	37.3959	30.2771
106600	54.0769	41.9596	38.5329	29.7553
106700	53.9691	41.3012	38.6826	28.6696
106800	54.2564	41.6363	39.7374	29.7866
106900	54.3696	42.1018	39.6452	31.0268
107000	54.168	42.3319	39.8762	30.7488
107100	54.7249	41.7505	40.2415	30.8007
107200	54.6302	41.9771	40.0635	31.795
107300	54.136	42.9568	38.7402	31.1306
107400	53.9054	42.869	38.9066	30.4065
107500	53.1488	42.9463	38.6349	31.1265
107600	53.1787	44.0279	39.6709	32.6887
107700	53.6093	44.3139	38.0424	33.4631
107800	53.775	42.8418	38.8237	33.5162
107900	54.0676	42.2528	37.8964	33.0675
108000	54.7022	41.945	36.442	31.8716
108100	54.3864	40.5022	35.412	29.46
108200	54.2294	40.8453	38.6334	28.1608
108300	54.1739	40.9519	37.5514	27.9825
108400	54.5527	41.399	37.4315	28.8856
108500	54.2439	42.0991	38.0485	29.8461
108600	54.7092	43.0691	37.1037	31.0898
108700	55.3228	45.0668	36.5282	31.9759
108800	55.0133	45.5304	38.9327	32.3904
108900	54.1585	45.7133	39.4909	30.7638
109000	54.1226	45.0355	40.4858	30.2019
109100	54.0255	45.464	41.4454	30.6195
109200	53.4322	43.4823	40.8062	30.7334
109300	53.0877	44.1412	39.5973	32.1535
109400	53.5946	44.427	39.6104	35.1549
109500	54.1346	46.6857	40.229	35.4683
109600	53.9132	47.2074	39.014	34.3144
109700	53.7843	47.9025	39.8919	34.822
109800	54.2195	47.9785	39.0801	32.8294
109900	54.2798	49.444	39.1151	31.1828
110000	54.0568	46.9655	37.1804	31.2233
110100	54.1669	45.1785	37.3818	31.6204
110200	54.4486	44.5092	36.5091	32.2507
110300	54.6737	44.6183	38.019	32.1157
110400	54.4574	44.0091	38.7751	32.6719
110500	55.0429	44.3057	41.1021	32.7009
110600	55.4303	46.3764	41.3995	32.166
110700	55.1438	46.2223	40.7523	31.4269
110800	56.0086	48.6588	39.9251	32.8977
110900	56.1151	46.7391	38.9946	32.3741
111000	55.4146	46.41	38.1759	32.6949
111100	55.3805	45.9114	38.5061	32.6822
111200	56.3321	46.7383	39.1751	32.9411
111300	55.5545	45.0806	38.1159	32.3562
111400	55.878	46.4934	38.449	33.503
111500	56.0146	47.5672	39.7744	32.5728
111600	55.3506	48.1402	40.249	34.2349
111700	54.7541	48.7693	39.9076	34.2119
111800	54.3718	47.9938	40.4244	34.0837
111900	54.6165	49.0417	41.4062	33.5378
112000	55.5006	49.037	40.4715	33.7812
112100	56.6101	48.6582	41.3004	32.7648
112200	57.0333	47.0556	41.8376	31.6411
112300	57.2732	46.4514	42.3951	31.9263
112400	57.0888	45.7996	42.8337	31.5821
112500	56.8684	45.8814	43.0055	31.4718
112600	56.3058	45.1009	42.2141	32.3723
112700	56.2388	46.0645	43.5998	32.4693
112800	56.6523	46.4462	43.559	32.3899
112900	56.4112	47.131	42.8216	34.3121
113000	56.0936	47.8367	43.559	33.9367
113100	56.0178	48.4039	42.8399	33.4711
113200	55.6045	48.1093	42.1463	32.8703
113300	55.337	47.2062	43.0477	32.5435
113400	55.6383	45.2371	42.3416	30.1533
113500	55.3051	43.3967	41.6105	31.0761
113600	55.8057	43.5157	41.4162	30.8185
113700	56.2145	44.4531	41.2403	32.5725
113800	56.9316	46.1585	42.2215	33.1075
113900	57.0469	47.8573	44.4169	33.4058
114000	57.233	48.9742	43.3591	32.9888
114100	57.2232	50.0958	43.3607	34.3084
114200	57.0951	49.564	43.0737	35.0121
114300	56.7093	49.904	41.4569	35.4869
114400	56.2153	49.2625	39.0862	35.5435
114500	56.4707	48.2365	40.3296	35.5823
114600	56.2445	46.5427	40.3179	34.1506
114700	56.5993	46.6245	39.4951	33.0365
114800	56.6218	46.77	39.364	33.5167
114900	57.4204	46.1005	41.7532	33.9332
115000	58.049	47.2785	41.7112	34.9439
115100	57.98	47.8711	42.1708	36.0219
115200	57.5149	47.0584	43.5916	35.006
115300	57.1566	46.7756	44.3093	34.6515
115400	56.9425	47.852	43.2569	35.0797
115500	55.9056	47.355	43.4839	34.7311
115600	55.9225	47.1886	43.7308	33.8409
115700	55.9986	48.8384	42.2451	35.3156
115800	56.3934	48.1148	41.4934	35.9224
115900	56.1203	48.9077	40.8217	36.4518
116000	56.7023	49.6564	39.5452	36.5452
116100	57.1579	50.1322	40.2399	37.4168
116200	57.3361	49.7091	41.5901	38.4824
116300	57.4461	51.2261	41.9008	36.8891
116400	57.4871	50.1921	43.2044	35.7923
116500	57.3083	49.9072	45.8351	36.6067
116600	57.1784	49.8409	43.9146	35.1405
116700	57.1459	50.0515	44.2415	34.5163
116800	57.0288	49.261	44.6298	34.4632
116900	57.0719	48.8384	43.4537	34.2302
117000	57.0125	48.6485	41.2949	32.7951
117100	56.8215	48.4648	42.7778	33.1042
117200	56.9563	47.3794	40.4639	33.8607
117300	57.4989	48.6769	40.6282	33.34
117400	57.3718	48.4216	41.3228	32.5758
117500	57.3275	49.6067	43.2543	33.9337
117600	57.3156	49.4626	42.0919	36.0146
117700	57.4528	49.3148	44.2369	36.5497
117800	56.915	47.1111	44.7878	36.4435
117900	57.5295	47.4757	43.9689	38.2898
118000	58.3097	47.8086	44.0466	36.799
118100	58.154	47.2372	44.3931	35.9411
118200	57.6051	47.4851	45.2516	34.6125
118300	57.7912	49.3161	44.7997	36.593
118400	57.9455	50.6179	44.5637	36.7825
118500	57.8748	48.8746	41.9282	38.3037
118600	58.0829	49.5897	43.5265	38.6051
118700	58.7151	49.8867	42.2583	37.6339
118800	58.9073	49.622	43.1108	37.5852
118900	58.2983	49.6404	43.0782	35.8768
119000	57.9361	51.0217	45.9232	36.0089
119100	58.0737	50.6787	46.0186	36.4465
119200	57.2429	51.8569	47.5588	38.1
119300	57.3998	53.2185	45.9891	38.4543
119400	57.938	53.7296	46.2945	39.3634
119500	58.2256	53.4062	44.2112	37.9424
119600	58.6743	54.0965	44.1123	37.9059
119700	59.4941	53.3718	43.1901	36.697
119800	59.1543	51.5969	43.9758	35.715
119900	59.0033	49.9765	43.4659	34.2313
120000	58.6689	50.8254	44.4648	34.6075
120100	58.1641	50.0864	44.8738	35.1836
120200	58.0523	50.3308	45.0251	35.4575
120300	57.8613	49.6436	43.8664	35.3413
120400	58.0919	50.2872	44.4513	36.9679
120500	58.2785	48.5984	43.9661	38.5967
120600	58.2488	48.7749	43.1903	38.085
120700	58.2945	48.2296	43.4708	37.3045
120800	58.6208	48.426	44.5532	37.875
120900	58.028	49.1727	43.415	37.8067
121000	58.4373	48.8828	43.0918	38.0543
121100	58.0363	48.6853	44.0084	37.591
121200	58.1705	49.0235	43.0065	38.5955
121300	57.646	49.6034	41.6312	37.976
121400	58.283	49.1731	43.9618	37.9624
121500	57.3534	49.9877	44.7473	37.3867
121600	58.0702	51.3264	43.7679	36.8436
121700	57.9305	50.4586	44.5367	36.3731
121800	58.6349	49.0442	46.106	36.0942
121900	58.486	49.4921	45.2821	35.9842
122000	59.2227	49.2078	43.9776	35.1371
122100	58.595	50.0731	43.3531	36.7778
122200	58.5857	51.6397	42.7605	36.4469
122300	58.1388	50.7855	42.2064	37.7976
122400	58.2555	49.064	42.4762	38.0447
122500	58.5628	48.5468	43.8192	38.5866
122600	59.2287	47.812	43.4876	36.6419
122700	60.0028	46.5869	43.9086	37.2153
122800	60.7775	47.2144	43.5743	37.1957
122900	60.2966	47.4458	43.4844	36.3502
123000	59.7379	48.7643	43.6205	35.7415
123100	59.4519	47.8832	43.5895	36.3241
123200	59.1315	48.4152	43.4788	36.2906
123300	58.7494	52.0081	43.9462	35.0369
123400	59.2546	52.0739	44.1498	36.1542
123500	59.4482	52.8896	44.1305	36.6068
123600	59.5775	52.1686	44.5523	37.4749
123700	58.892	52.32	45.3571	36.8427
123800	59.435	50.326	45.9616	39.138
123900	59.6174	51.4304	44.5634	40.0938
124000	59.2165	49.5553	44.0186	41.4263
124100	59.1026	50.4027	44.7137	41.9734
124200	59.7087	51.1479	43.2219	43.3504
124300	59.4455	51.7721	42.4168	41.995
124400	59.836	52.4522	42.7533	39.6286
124500	60.3257	53.5385	41.9857	39.3185
124600	60.5428	53.5008	41.7335	38.2993
124700	60.5411	52.0161	42.3729	37.9677
124800	60.1012	51.3556	42.9103	38.4443
124900	59.7971	49.5124	43.1056	39.7595
125000	59.4086	50.1971	45.611	38.9217
125100	59.5979	49.0165	45.5087	39.6334
125200	60.3	50.1632	45.1332	39.5583
125300	61.3309	48.8522	45.1305	39.8667
125400	61.3788	49.5939	45.5409	39.3197
125500	62.5681	49.7786	45.1987	39.1723
125600	63.1977	48.6565	45.6421	38.7645
125700	62.6969	48.4906	45.4907	39.0456
125800	62.7775	49.9438	45.4583	38.1835
125900	63.0236	49.5694	46.2165	39.3631
126000	63.3605	48.3853	45.559	40.2359
126100	63.6119	50.4042	44.8541	39.4744
126200	64.0144	49.54	43.9418	38.4213
126300	64.142	50.0185	43.7206	39.3907
126400	65.0463	49.9222	43.3631	40.3411
126500	64.6089	50.9128	42.3841	40.2945
126600	63.9985	50.2389	43.2076	41.0451
126700	64.2053	51.4595	44.8427	42.3641
126800	63.9394	50.8166	45.3904	40.4944
126900	63.1475	51.4637	45.8648	39.5428
127000	62.662	51.1024	45.4359	38.6905
127100	63.4249	51.4141	44.9713	39.6527
127200	63.4383	50.6606	43.9897	37.9862
127300	63.1264	50.033	42.2504	38.7569
127400	63.7313	49.851	40.3898	37.4964
127500	64.6836	48.3497	40.3593	36.8243
127600	64.3125	49.1021	41.3407	36.1531
127700	64.995	49.5245	41.5461	36.3103
127800	65.977	51.3261	41.7921	36.7067
127900	66.3015	50.8372	44.0539	37.8788
128000	66.8869	50.6903	45.4663	39.0968
128100	67.7897	51.7379	43.9031	37.9308
128200	67.246	54.3515	42.1966	38.3419
128300	67.4979	54.0229	43.1923	39.2355
128400	67.6173	52.6699	42.4039	38.9435
128500	67.5011	54.9722	41.4644	39.8871
128600	67.0462	54.4259	41.3636	40.5977
128700	67.7965	50.5944	43.8153	40.4607
128800	67.5419	50.4425	44.2763	39.7386
128900	67.1348	52.6608	43.7963	40.4058
129000	67.5677	51.5155	43.8769	37.5386
129100	68.0945	51.3157	44.1475	38.0606
129200	68.159	53.2678	44.515	39.5407
129300	68.837	53.2522	44.5143	39.2793
129400	69.1372	53.3682	42.9341	39.2159
129500	68.9415	52.5421	44.1413	41.0572
129600	68.6814	52.8568	43.789	40.2141
129700	68.9412	51.6628	43.1813	39.9681
129800	67.8441	50.4499	43.0093	40.5442
129900	69.0177	50.1321	45.3887	39.4697
130000	68.9795	50.7084	43.7518	39.4566
130100	69.0721	50.8781	45.4205	40.5519
130200	68.939	52.1243	46.0778	39.4055
130300	70.1055	52.8359	45.7144	39.043
130400	69.3445	53.4998	43.9735	40.1156
130500	69.1916	54.316	43.5837	39.5829
130600	69.7132	52.8241	41.7902	39.059
130700	69.4277	49.9939	41.0871	39.0319
130800	68.5951	50.4157	40.8851	40.0791
130900	68.9057	50.6179	41.61	38.2917
131000	69.0305	48.8218	42.2247	38.4796
131100	69.1518	49.8618	44.2579	39.0585
131200	69.5925	53.2405	43.6866	39.5268
131300	69.8418	54.4315	44.0681	38.6557
131400	68.6208	52.3271	44.9331	40.0643
131500	67.9183	53.2741	46.0362	39.8823
131600	66.8229	52.1165	44.4832	38.8493
131700	66.4772	50.7164	43.9993	38.431
131800	65.9015	50.1547	42.8786	38.2977
131900	67.0051	52.2147	42.164	38.9652
132000	67.0532	52.1855	40.3462	40.4699
132100	66.9497	53.6355	39.5973	41.4239
132200	66.2745	56.1338	39.4751	42.4193
132300	66.4776	55.8009	41.0252	43.4345
132400	65.6352	55.531	40.7256	43.9979
132500	65.9743	55.9667	41.9119	42.1741
132600	66.5258	55.8486	41.559	43.4661
132700	66.6664	52.6422	41.0164	43.3512
132800	66.2687	52.521	40.8602	42.8717
132900	65.9404	52.3161	39.6272	42.2189
133000	65.8079	52.0212	39.2636	42.2513
133100	65.091	52.7785	39.1258	40.503
133200	64.9234	53.2542	40.4136	39.2596
133300	64.9148	53.4112	39.7396	38.8297
133400	64.5586	52.224	40.9584	39.9389
133500	64.1582	52.0357	41.715	39.5737
133600	64.8476	50.5569	42.9462	39.7151
133700	64.197	48.0957	43.6097	40.6356
133800	64.2057	46.4582	43.5373	41.6434
133900	64.7085	47.0276	42.8093	40.0327
134000	64.8723	46.8977	42.5951	41.4799
134100	64.1112	48.5339	43.3226	41.8587
134200	64.2961	51.2591	42.7181	42.6462
134300	64.633	52.5456	42.9259	40.7502
134400	64.0097	52.7784	44.3263	40.9669
134500	64.0164	53.7397	44.5781	41.201
134600	63.7667	53.3549	43.7148	41.2588
134700	63.7003	51.865	44.1225	41.0193
134800	63.459	51.7337	42.2911	40.152
134900	64.2919	52.5328	40.5712	39.676
135000	64.7044	52.7767	40.2968	38.4351
135100	64.6034	52.9032	41.0323	39.001
135200	64.5637	54.7399	38.8354	39.643
135300	64.7598	55.8944	40.2566	41.61
135400	63.8441	54.7604	42.1491	42.5813
135500	63.1535	54.327	42.5717	43.8323
135600	63.4072	52.643	43.2528	43.7871
135700	63.5445	52.886	44.2185	43.5002
135800	63.67	52.9485	44.36	44.3355
135900	63.5393	55.526	43.3495	44.8437
136000	63.6608	55.8001	41.4651	45.4652
136100	64.0546	58.6979	41.0383	44.4051
136200	64.1103	57.8488	40.8938	43.1375
136300	63.3285	58.3157	39.7146	43.1565
136400	63.6958	56.7802	40.4938	43.5498
136500	63.5014	56.0249	42.0996	43.7984
136600	63.3033	53.1474	41.2631	44.3682
136700	63.1677	55.3266	42.2774	45.2037
136800	63.5239	54.9924	43.6471	45.7511
136900	63.4941	54.5424	43.3415	44.7117
137000	63.4184	56.1729	43.7101	42.2097
137100	62.5364	56.3198	43.3448	42.8162
137200	62.6159	53.2868	43.1625	42.6809
137300	62.232	53.1167	42.7028	41.8496
137400	62.1012	52.7719	42.4313	42.172
137500	61.5586	52.1693	39.6667	43.4629
137600	62.2299	54.0833	39.4056	41.8557
137700	61.89	55.3625	39.8511	42.4768
137800	62.4448	55.2459	40.3059	42.173
137900	62.7443	55.5328	39.7178	41.9709
138000	62.9362	56.3404	41.4189	42.6917
138100	62.7177	56.1656	41.1655	43.7713
138200	63.1336	56.075	42.5558	42.4588
138300	62.5407	54.9689	41.1661	43.2075
138400	61.8756	55.5763	42.3272	44.2081
138500	62.3656	53.7063	42.993	42.9542
138600	62.6638	51.9157	43.7056	42.3254
138700	62.7999	52.3665	41.6132	43.3136
138800	63.1043	52.2465	43.1781	42.4412
138900	63.481	52.3938	42.6759	41.3257
139000	63.685	52.6236	43.1002	41.1471
139100	63.726	53.902	43.0448	41.798
139200	63.4262	55.2409	43.3392	41.9507
139300	63.3978	56.1948	43.6879	42.8255
139400	63.1815	54.8297	43.7595	43.5281
139500	63.1201	57.3369	42.7968	46.0329
139600	62.9967	57.9264	42.1964	45.9832
139700	63.27	55.879	41.7622	46.954
139800	63.3624	55.1138	41.8258	46.9562
139900	63.5531	56.5524	41.7233	48.5771
140000	63.6017	54.1111	41.7552	46.5716
140100	63.3862	53.2207	42.9824	45.9492
140200	63.4824	54.7136	42.4404	45.0353
140300	63.2449	54.625	41.2591	43.7733
140400	63.5334	53.5061	41.0889	42.2505
140500	63.8838	53.7871	41.1226	43.3208
140600	64.2943	53.825	41.8395	42.5521
140700	64.1664	53.5965	43.3879	42.4927
140800	64.4351	54.427	45.2728	43.3468
140900	64.8187	54.1099	45.3905	42.3791
141000	64.5091	53.9895	45.146	42.6779
141100	64.5434	54.9555	43.5224	45.246
141200	64.3245	54.6155	43.9188	45.5766
141300	64.0404	55.0158	42.3162	45.6443
141400	63.4679	55.6736	42.5743	46.8263
141500	64.0614	55.2312	43.641	46.54
141600	63.5584	54.1684	45.2981	44.9836
141700	64.0825	51.9368	44.4435	48.7007
141800	64.3126	50.439	45.4018	47.839
141900	64.8423	48.8265	45.0534	47.1288
142000	64.3424	48.6269	42.9231	47.6821
142100	65.2974	47.2382	43.4385	46.7206
142200	64.9042	47.0977	43.2976	43.4284
142300	64.6128	44.5817	43.0589	43.6049
142400	64.3798	42.8622	44.0881	45.0381
142500	64.3017	42.1557	45.3426	43.142
142600	63.0733	39.404	42.6504	44.0809
142700	63.4124	37.9596	42.9029	43.3568
142800	63.7462	38.1908	42.9351	43.0726
142900	63.7327	38.7106	42.1054	41.9908
143000	63.7001	38.1135	41.2475	41.8687
143100	64.3914	39.3217	42.5117	41.7822
143200	64.4157	38.9794	42.4818	41.7626
143300	64.9796	39.0788	42.739	41.9923
143400	65.4496	39.8211	42.5746	40.9584
143500	64.84	39.7359	42.4335	41.6843
143600	64.9464	42.061	41.2776	42.43
143700	64.6024	44.9259	40.902	42.3421
143800	64.194	46.2909	40.2899	42.1583
143900	63.0204	47.8766	41.2708	42.9733
144000	63.6272	50.7993	43.017	42.8616
144100	63.4464	50.5296	44.0029	42.2186
144200	63.472	51.3465	44.1882	42.6086
144300	63.8937	53.0868	43.9911	44.8644
144400	64.5522	53.5729	43.5458	45.1383
144500	64.7007	55.1613	40.92	45.7048
144600	64.7964	55.8263	41.6419	45.8173
144700	65.4954	54.8309	41.9996	45.0088
144800	65.0107	56.14	41.3114	44.2226
144900	65.2419	57.2067	41.412	41.6616
145000	65.4002	55.7144	43.777	41.3337
145100	65.2481	56.0774	43.3719	40.542
145200	65.1827	57.2334	44.1601	39.6679
145300	65.0456	55.6586	45.7047	37.8251
145400	65.2186	55.3331	45.9875	39.5127
145500	65.0421	55.2457	45.845	37.8949
145600	65.3882	55.372	45.7606	39.1247
145700	65.3524	56.5422	43.6977	40.1276
145800	65.6997	56.8758	42.8056	40.2648
145900	66.0976	58.3358	41.5386	39.6289
146000	66.1298	58.6078	41.1226	41.3883
146100	66.5633	59.1675	40.6656	40.1936
146200	66.6756	58.5066	42.47	40.1837
146300	66.2082	59.1039	42.5651	40.5087
146400	65.6158	58.6011	44.2948	39.9692
146500	65.4358	60.285	44.9712	39.0358
146600	64.9129	60.3212	45.1916	39.9232
146700	64.5142	61.8983	44.2625	38.5205
146800	65.3145	62.2128	44.2363	38.4295
146900	65.1834	61.8343	43.6636	38.9657
147000	65.4624	59.7577	44.069	39.8791
147100	65.74	61.6819	43.5911	38.4452
147200	65.8611	60.2799	43.2835	38.3954
147300	65.8062	57.5363	44.3185	38.1073
147400	66.184	56.692	43.6754	37.7892
147500	66.4185	57.2543	43.4714	35.5362
147600	66.2403	56.5082	43.7151	35.5314
147700	65.884	57.6448	44.1965	36.1343
147800	65.5162	59.9159	42.8091	34.9083
147900	64.9253	61.4537	43.0468	34.208
148000	64.8019	61.1762	41.6347	34.5144
148100	65.0148	61.2514	40.7652	34.3497
148200	65.6285	61.2196	40.4024	33.6503
148300	65.6407	61.3353	40.2632	34.568
148400	65.4024	62.048	40.2547	35.3764
148500	65.0444	63.1408	40.4823	35.4009
148600	65.295	62.2957	43.1921	36.0039
148700	64.7959	62.7393	43.5536	35.9612
148800	65.0012	65.4034	44.0652	36.0974
148900	66.0588	65.0163	44.137	36.0355
149000	66.9273	64.7393	42.7852	36.5204
149100	66.7876	65.3485	39.8166	36.1177
149200	67.3316	62.8183	40.3266	36.54
149300	67.1428	61.1034	39.2735	36.9914
149400	67.1385	60.221	39.2505	36.9522
149500	67.0382	59.459	40.3029	37.6486
149600	66.8699	60.055	42.0657	37.2083
149700	66.6578	62.1446	40.7832	38.0707
149800	66.9971	62.5115	41.9128	37.6838
149900	66.5571	62.476	41.8876	35.358
150000	65.6144	64.0148	42.2272	33.5503
150100	65.0771	64.2685	42.1792	34.5039
150200	65.2821	64.2123	43.173	33.5698
150300	64.8747	63.8376	43.8456	33.1768
150400	64.8048	65.3558	43.0055	34.862
150500	65.6538	65.7445	45.0535	34.8866
150600	66.4608	66.4387	44.7941	35.1763
150700	66.1757	66.0118	44.3755	35.2878
150800	67.0073	67.1977	42.9814	34.6185
150900	67.111	66.7902	43.159	35.021
151000	66.5733	66.1905	40.7405	35.5686
151100	66.4814	65.471	40.3106	36.6486
151200	66.5163	66.0957	41.2157	36.5755
151300	66.2088	65.3078	40.9629	37.6145
151400	66.6846	65.0514	40.1747	38.7126
151500	66.6048	64.6285	41.2629	39.4407
151600	66.183	63.4028	40.9486	37.3152
151700	66.5511	63.6009	41.021	38.4336
151800	66.2935	63.2122	42.2856	38.5554
151900	65.5817	62.8091	42.3646	37.9524
152000	65.9939	62.8067	41.9483	36.2837
152100	66.8716	64.0172	42.0419	37.2491
152200	66.3448	63.0481	41.4614	36.6483
152300	66.1097	62.7756	40.0013	35.5239
152400	66.4635	61.8944	41.5949	35.8936
152500	66.6448	61.3228	42.6174	37.8241
152600	66.3777	60.5072	43.6552	37.3498
152700	66.7769	59.7875	43.5781	37.24
152800	67.1607	58.4664	43.1229	38.1867
152900	67.1105	58.3756	42.9702	38.6011
153000	66.7851	57.4529	40.626	38.7907
153100	66.892	56.8167	39.7442	39.8468
153200	67.1958	57.0456	39.9148	40.1865
153300	67.7839	56.7415	40.8029	41.0628
153400	67.6762	57.1414	39.8924	40.489
153500	67.8097	58.3023	40.7042	40.3273
153600	67.263	59.2291	40.8719	41.006
153700	66.9216	59.5682	40.2626	41.2954
153800	66.139	60.7785	39.7903	42.2554
153900	66.7815	60.1457	40.4051	41.6979
154000	66.4011	61.3121	41.3664	42.3367
154100	66.5108	61.5535	41.3258	42.7429
154200	67.1303	61.3548	41.4255	41.915
154300	67.7299	60.6017	41.5128	40.4678
154400	67.4544	59.9921	40.3251	41.3553
154500	68.0219	59.7369	39.1507	41.6032
154600	67.8482	58.3159	38.1248	40.7142
154700	66.9636	58.5946	37.1886	42.3763
154800	66.2605	58.8073	37.1047	42.3331
154900	66.2163	60.2819	38.5693	43.8506
155000	65.8367	59.602	39.5961	42.8594
155100	66.3591	59.2432	40.7817	43.1157
155200	66.3119	59.4394	40.5067	42.2867
155300	67.0474	60.2537	41.8524	42.2418
155400	67.4608	60.1482	41.9999	41.1735
155500	67.6573	58.7882	42.4983	41.7042
155600	67.6261	59.597	41.8688	41.5559
155700	67.9253	59.9666	43.3593	41.8287
155800	67.9807	59.761	43.7124	41.0461
155900	67.5525	59.9751	44.5886	40.0064
156000	68.0152	61.1019	44.0392	40.6655
156100	68.6881	60.7027	44.0117	41.2961
156200	68.1256	59.7593	42.01	41.1835
156300	68.0049	58.7828	40.1187	42.2546
156400	68.2436	58.163	39.7555	41.3493
156500	68.115	58.5095	39.7691	41.9707
156600	66.5963	58.0068	40.0446	39.9551
156700	67.588	59.1926	42.2022	41.2463
156800	67.2539	58.8109	44.5949	42.6755
156900	67.1553	58.8121	43.1869	45.1646
157000	66.4463	57.822	42.6528	45.2805
157100	67.2894	57.9269	43.3323	47.4249
157200	67.0187	56.2783	43.665	46.3314
157300	67.4343	56.2695	41.3318	44.8855
157400	66.8892	55.8675	41.17	43.9996
157500	66.8781	56.3911	41.3475	42.6442
157600	66.4819	57.2145	40.4138	41.7847
157700	66.7651	58.2394	39.0397	42.2146
157800	66.5517	59.6821	39.6309	43.9317
157900	67.1921	60.5679	39.987	46.3947
158000	66.7036	60.7963	38.4287	46.9752
158100	67.2124	60.1348	38.8446	48.7441
158200	66.8359	60.0231	37.9767	46.9664
158300	66.6193	58.8902	38.3456	46.4446
158400	66.1021	58.2336	37.9814	44.39
158500	66.8062	58.3832	39.3338	45.713
158600	66.0727	59.1259	39.4015	43.5939
158700	65.9453	58.8467	41.2973	45.9902
158800	65.892	59.4425	40.5171	45.5525
158900	66.4304	59.6412	39.7094	46.166
159000	66.1568	59.8815	39.2103	44.9616
159100	66.6423	60.2452	39.4133	46.785
159200	66.7668	60.8121	38.5209	45.1328
159300	66.1192	61.5521	38.6935	45.0407
159400	65.8984	61.7005	39.0431	45.009
159500	66.0051	60.6386	39.0868	43.4515
159600	66.0408	60.3315	36.8084	42.9251
159700	65.836	60.7464	36.5774	42.7556
159800	66.6237	60.4468	36.8232	42.0957
159900	66.0904	60.5672	38.3549	40.7219
160000	65.8882	61.7882	38.4278	42.0064
160100	65.7384	61.1584	39.7877	40.6914
160200	65.6663	58.9731	39.5797	41.0585
160300	65.7657	58.3462	39.8672	41.9507
160400	65.8417	57.8906	38.8172	43.5617
160500	65.9806	56.9965	38.8222	43.1901
160600	65.2017	57.0101	38.976	43.444
160700	64.8665	58.5186	38.2558	43.4183
160800	64.053	59.7447	37.7128	43.3929
160900	64.1704	59.9526	37.2328	43.4042
161000	63.9159	60.0236	37.5451	43.5001
161100	64.8141	60.2211	38.2274	44.0076
161200	64.797	60.3332	38.6755	45.5425
161300	64.5523	60.1054	39.3304	46.1281
161400	64.4675	59.9836	39.7016	44.8483
161500	64.4885	60.5874	41.2206	45.4663
161600	64.0676	60.3685	40.1931	45.2565
161700	64.198	59.571	41.2632	45.3789
161800	64.121	58.9922	39.408	44.6735
161900	63.9023	60.6662	39.244	44.3421
162000	63.5533	59.2192	38.6812	44.0338
162100	63.6465	59.6014	39.3644	43.5242
162200	62.8834	60.8395	38.6913	41.3034
162300	63.3877	61.0058	41.2177	40.7028
162400	63.7659	59.5456	41.3625	41.3906
162500	64.5733	60.7843	40.3845	41.6688
162600	63.9508	60.5933	41.2724	41.905
162700	65.344	59.1903	41.92	42.8279
162800	65.2298	60.7493	41.3721	43.0218
162900	64.7468	61.0221	41.5564	42.3738
163000	61.552	60.9552	41.2782	42.1179
163100	62.2532	60.2393	41.0901	42.7631
163200	61.6951	61.3068	40.6842	42.8089
163300	61.8099	59.2034	41.1223	43.3991
163400	61.6537	58.7497	41.4083	44.4319
163500	64.5006	58.424	42.7419	44.3859
163600	64.0836	59.4894	42.467	44.0438
163700	63.706	59.0497	42.1105	44.0944
163800	63.7874	60.8581	40.173	44.7152
163900	63.7809	61.3496	39.0767	43.8878
164000	63.4622	61.3836	37.5578	43.7394
164100	63.3247	60.9568	35.8477	45.4974
164200	63.8582	61.537	36.1418	45.8184
164300	63.8777	60.1292	36.9237	45.4067
164400	63.9576	60.6832	37.51	46.2623
164500	64.0213	60.6526	37.3635	46.8593
164600	63.5852	61.5883	37.9532	45.1327
164700	62.7766	61.4459	38.4037	46.9133
164800	62.4567	62.1034	38.8214	46.9035
164900	62.3532	62.0054	40.006	47.0659
165000	62.4318	63.3298	40.9385	47.4951
165100	62.8872	63.5452	42.0378	46.0832
165200	62.8039	63.2813	42.0915	44.4279
165300	62.9125	63.0282	41.3029	43.4728
165400	62.762	63.0713	40.0506	42.5543
165500	62.9435	62.4212	39.7386	41.0904
165600	62.6459	61.903	39.1454	41.2637
165700	62.728	61.7473	38.1787	40.2393
165800	62.5968	61.6449	39.1485	41.3074
165900	62.8682	60.7159	39.9211	42.3334
166000	62.2052	60.8448	41.0379	42.9744
166100	62.9418	60.3218	42.8117	44.2314
166200	62.9788	60.1045	43.2365	45.2358
166300	63.6228	59.8325	42.1752	45.6952
166400	63.4776	60.4992	42.3956	45.2548
166500	64.1865	59.06	41.1704	45.5431
166600	64.2923	58.9656	40.1391	46.3565
166700	64.1395	59.0007	41.274	46.7224
166800	63.8244	59.2813	41.552	44.4286
166900	63.8271	59.1945	41.2542	45.592
167000	64.0171	60.8432	40.7019	46.1941
167100	63.8516	61.787	40.2545	44.6705
167200	64.4265	62.1644	39.3236	44.1463
167300	64.645	61.7353	40.0316	43.3305
167400	65.0009	61.5497	40.8672	42.541
167500	64.4732	61.5983	42.2755	42.1315
167600	64.6352	61.3221	42.7111	42.9806
167700	64.2909	61.7992	42.0074	43.0497
167800	63.3842	62.4717	42.2117	44.3204
167900	64.3213	62.3677	40.9457	42.8667
168000	64.562	61.4471	41.9752	42.3437
168100	64.7955	60.9538	42.1081	42.0283
168200	65.4515	59.9877	43.2926	41.6205
168300	66.6569	60.0773	42.5137	42.2729
168400	66.3504	60.5285	43.4638	44.1495
168500	66.4579	60.3701	42.2477	44.3478
168600	66.0989	60.2882	41.0378	44.3843
168700	65.5385	60.7019	41.9898	45.0387
168800	65.4836	60.5354	42.1584	44.4944
168900	65.1343	61.1166	44.7019	42.9848
169000	65.518	61.1145	44.9576	44.3604
169100	66.5315	61.3782	46.6355	45.2373
169200	66.9105	61.5838	47.0501	45.9255
169300	66.516	60.8877	46.8439	47.0655
169400	67.1023	60.0872	43.7592	46.9424
169500	66.9066	60.2821	43.9172	46.0568
169600	66.2421	60.3402	43.4272	44.1026
169700	66.792	60.4677	41.5828	43.3326
169800	67.3255	60.8847	41.7338	43.0381
169900	67.3283	60.8449	43.2076	43.6276
170000	67.8953	61.2512	43.2713	43.0922
170100	68.0249	60.8957	44.1643	44.2422
170200	68.3256	61.4738	45.6839	44.371
170300	68.5291	61.519	46.6629	43.3915
170400	68.0822	61.6759	45.5513	43.4482
170500	67.8452	61.216	45.3499	43.9242
170600	68.3566	61.9866	43.928	43.4094
170700	67.9294	61.5318	43.6978	44.1354
170800	68.4692	62.3092	45.2266	46.0933
170900	68.7397	62.8125	45.4461	45.2862
171000	69.152	63.3991	47.133	44.7017
171100	68.6722	63.6909	47.0356	45.4365
171200	68.492	63.8963	47.0165	44.7951
171300	68.0181	63.8835	45.7881	42.6104
171400	68.5783	63.5954	45.4333	44.7448
171500	69.0944	63.5152	44.9587	44.3191
171600	69.8969	63.4945	46.2774	43.6533
171700	70.6164	62.2341	46.9337	42.67
171800	70.5861	61.738	46.4964	44.1159
171900	70.3395	61.5368	47.5379	42.9933
172000	70.1051	61.0868	47.3533	43.709
172100	69.6295	60.3168	45.7488	44.7045
172200	69.2803	61.1687	43.8792	45.9327
172300	69.2535	61.2279	45.1672	46.8459
172400	69.4925	60.7689	45.4656	46.2976
172500	69.4095	61.8465	45.5042	46.3417
172600	69.9112	61.696	47.2426	45.6977
172700	69.9087	61.0791	47.8516	45.6834
172800	70.4318	61.7383	47.8626	45.1436
172900	69.7719	62.2473	47.04	45.952
173000	69.2947	61.6263	46.101	45.9266
173100	68.9872	62.3432	45.5278	46.2059
173200	69.3385	62.646	45.7308	44.9483
173300	68.8236	62.755	45.5203	43.7238
173400	69.6899	62.089	46.1919	44.1845
173500	69.4322	61.8519	46.3807	43.9404
173600	69.0102	61.2031	46.8501	44.5159
173700	68.6678	61.9138	46.8708	45.2814
173800	68.2792	60.9923	46.0197	44.7423
173900	67.7382	61.8869	46.2244	43.2324
174000	68.2993	62.6217	45.8853	43.1427
174100	68.9992	62.6072	47.3569	41.6884
174200	69.9446	62.5164	48.6057	42.1263
174300	70.9327	63.0937	49.562	44.738
174400	71.8291	63.3706	49.5672	46.632
174500	71.8982	63.3734	49.7976	47.0194
174600	71.8923	63.2956	49.4209	48.651
174700	71.2217	63.1744	49.0928	47.816
174800	70.8222	63.2382	49.144	47.6306
174900	70.1733	62.5045	47.6686	46.2166
175000	69.8628	61.4175	47.9209	45.3906
175100	70.2887	61.7128	48.1723	45.3296
175200	70.5885	61.6468	48.1375	45.2011
175300	70.5868	61.1465	48.6554	44.2298
175400	70.7884	61.3328	50.8643	44.0053
175500	71.3124	63.0499	51.9313	45.8951
175600	70.7975	63.8207	51.3725	45.8511
175700	71.1071	63.9096	51.5976	46.6224
175800	71.2803	64.1519	50.6452	45.6647
175900	71.6404	64.5718	50.0856	45.9744
176000	71.4606	61.3266	49.001	45.5663
176100	71.901	61.011	48.2562	44.0745
176200	71.1299	60.8316	47.5848	43.9809
176300	70.9515	60.8624	47.4473	43.5545
176400	70.5552	61.2217	48.4643	43.1991
176500	71.2222	63.6646	49.2238	44.1893
176600	70.3087	63.7691	49.2699	44.295
176700	70.1839	63.8927	49.1234	45.5878
176800	70.6327	64.1721	48.7875	47.7684
176900	70.7892	63.0349	48.6442	48.3722
177000	70.4582	62.5257	49.2535	45.8969
177100	70.7281	61.9717	50.0478	46.7046
177200	71.331	62.1972	51.2577	45.2677
177300	71.6712	62.0154	53.8094	44.293
177400	72.0198	62.8401	52.1402	44.5802
177500	72.1033	63.3446	52.0187	45.1838
177600	71.9061	63.6027	51.4759	43.9208
177700	72.331	63.0182	51.4382	44.9563
177800	72.334	62.8762	50.2855	44.8266
177900	72.0526	62.5236	50.1494	44.0619
178000	71.9556	62.0119	49.6128	44.6001
178100	72.2288	63.2426	48.47	45.0808
178200	72.0461	64.0962	48.2731	44.8895
178300	71.6009	64.5675	48.1269	45.147
178400	71.001	64.5716	49.5691	44.9467
178500	70.7362	64.81	49.6793	45.4682
178600	71.3411	65.0314	51.7965	46.1718
178700	70.4792	64.7275	51.696	45.8394
178800	70.2603	64.3727	51.4065	45.2829
178900	71.2985	65.2439	50.4939	45.9638
179000	71.7361	65.4846	50.6247	46.0418
179100	70.4316	64.2938	50.2824	44.3828
179200	71.3706	64.2523	50.3449	42.9872
179300	71.2928	63.598	52.0877	43.9842
179400	70.4734	63.1358	53.5746	43.9992
179500	70.4522	63.1595	53.2429	43.2712
179600	71.071	62.8707	52.7068	44.2709
179700	70.9963	62.7722	54.2422	45.5319
179800	71.0964	63.7295	53.063	44.4332
179900	71.7007	63.7834	52.2442	44.2314
180000	71.4103	63.3758	53.5452	44.4156
180100	71.6623	62.9697	53.9147	45.0271
180200	71.4591	63.9601	53.1006	45.8817
180300	71.228	64.1034	53.1528	47.3539
180400	71.1899	64.1869	53.3581	47.2004
180500	70.9278	64.9197	52.8321	47.8071
180600	70.6281	65.9822	53.2803	47.36
180700	70.7908	64.9066	53.031	48.1218
180800	71.1303	64.548	53.0652	47.4693
180900	70.8293	63.9006	52.9384	48.9906
181000	71.5587	63.7454	51.601	49.0315
181100	72.442	63.6031	51.0848	48.9825
181200	72.5104	64.1192	51.1703	48.4643
181300	72.5309	64.9137	50.803	48.3866
181400	73.3923	64.5771	51.9444	47.2337
181500	73.3694	65.1134	53.006	44.7544
181600	72.7285	64.9914	53.2342	45.4736
181700	71.8832	64.4407	53.615	44.769
181800	71.782	63.6212	55.3212	43.8188
181900	71.4687	64.1318	54.0335	43.6519
182000	71.2128	63.2142	54.3833	45.1341
182100	71.5795	62.5018	54.8027	45.3232
182200	72.2864	62.3207	54.1668	44.1455
182300	72.7495	62.5466	52.9008	44.8742
182400	72.0569	63.1983	52.5437	44.8708
182500	72.6266	63.0579	52.6388	45.0208
182600	72.6633	63.1839	52.2088	45.2208
182700	72.8557	64.4476	53.1966	44.7653
182800	72.4248	64.067	51.8601	44.751
182900	72.5335	63.5661	51.4737	44.3218
183000	71.9293	64.976	51.1151	43.9878
183100	71.4398	65.5736	51.8249	44.1195
183200	71.495	64.9478	51.6155	44.8597
183300	71.0852	65.5942	53.6151	45.2127
183400	71.5084	65.0126	55.0452	46.8987
183500	71.5349	64.0995	56.6309	46.6288
183600	71.5765	64.4191	56.507	47.1415
183700	71.9036	64.3635	56.4011	47.1891
183800	72.4973	64.4023	55.448	45.8533
183900	72.7178	65.2037	53.9088	45.0181
184000	73.0996	64.4612	52.4121	45.207
184100	73.234	62.9183	50.5447	45.3312
184200	72.7557	63.3373	50.8787	45.69
184300	72.4185	63.7589	51.2106	46.0929
184400	72.2586	63.9502	53.5177	45.5112
184500	71.6141	64.634	53.4323	44.5395
184600	71.6121	65.9782	54.789	43.0081
184700	71.8681	66.2624	55.4453	43.5634
184800	72.2669	65.3445	55.7645	44.9424
184900	71.3865	64.0943	54.2526	45.8847
185000	71.4693	64.159	53.4013	46.6598
185100	71.8034	64.9064	54.844	47.1757
185200	71.6189	64.0951	53.5116	47.0063
185300	71.7445	64.3714	52.9732	45.7319
185400	72.7937	65.2837	53.7339	46.4463
185500	73.0058	65.6976	55.5578	47.951
185600	73.1221	64.6403	55.8524	48.2153
185700	73.3891	64.0156	55.4916	47.7917
185800	73.0312	63.7969	54.5471	49.0271
185900	72.94	64.0145	55.2014	48.223
186000	72.7364	63.8084	53.7901	46.6722
186100	72.6766	64.4886	53.6845	46.4214
186200	72.6378	65.3305	54.2934	46.2269
186300	72.5664	65.7977	56.2548	45.1264
186400	72.1933	65.4113	53.9064	43.6025
186500	71.8614	66.7776	54.3963	44.6927
186600	72.2615	67.3945	52.4091	44.1992
186700	71.9952	66.7351	51.998	44.3116
186800	72.0765	65.9523	50.9122	44.4041
186900	71.9293	65.6275	52.8668	45.6611
187000	72.9427	63.5816	52.4755	43.7665
187100	72.0695	62.2615	53.0188	43.9294
187200	72.5106	62.5344	53.3667	44.7443
187300	72.3983	63.2917	54.3836	45.7956
187400	72.7212	64.1737	53.7253	45.8917
187500	72.5191	64.9742	55.3852	47.902
187600	72.6725	66.1887	55.752	48.1855
187700	71.9945	66.8692	56.7813	47.9453
187800	73.0722	66.466	55.7781	48.8478
187900	72.7896	65.934	54.9178	48.3235
188000	72.8433	65.6618	52.5085	48.0716
188100	73.269	64.9985	52.0468	47.1621
188200	73.0315	64.5908	52.3887	47.5668
188300	72.4965	64.3147	52.8921	47.3657
188400	72.7813	65.3721	52.2572	47.5663
188500	72.6315	64.7757	52.1812	47.7242
188600	72.0981	64.5384	53.0016	49.1444
188700	72.5576	64.976	51.6483	48.621
188800	72.2187	65.7264	50.1097	47.6001
188900	72.409	65.0979	51.7155	48.1482
189000	72.2034	65.5243	52.1058	47.1095
189100	72.4723	65.5676	51.4931	47.3772
189200	72.3672	65.8328	50.7054	46.4831
189300	72.3942	64.8776	52.4417	46.9554
189400	72.2473	65.585	51.7174	47.0967
189500	72.4256	65.2746	52.4663	48.2029
189600	71.8054	64.5745	52.4877	47.3507
189700	72.1281	63.8915	52.6114	48.0606
189800	72.3124	64.081	51.8583	46.935
189900	72.0518	63.1775	54.2198	46.1726
190000	72.1413	63.6261	54.934	45.0343
190100	72.6011	64.1285	53.2983	44.2786
190200	72.6776	64.549	53.5787	44.2141
190300	73.0394	65.5099	53.9787	44.9136
190400	72.8752	66.0541	52.153	44.9067
190500	72.3381	65.7352	51.2291	45.2157
190600	72.6003	65.943	52.4694	46.5471
190700	72.7627	66.0435	50.7721	46.5011
190800	72.6073	65.5232	51.2606	46.2033
190900	72.4527	65.8635	52.1322	47.5077
191000	73.2583	65.4221	51.5728	49.0404
191100	73.3271	65.2667	51.9288	48.5734
191200	72.7101	65.4695	54.8859	48.5416
191300	72.6643	65.1618	54.6824	48.305
191400	73.4303	64.0488	53.2729	48.2296
191500	73.3378	64.7239	53.5857	46.3436
191600	73.0066	65.0636	53.588	46.3575
191700	73.3023	64.1812	51.5612	46.8535
191800	73.3729	65.6246	50.9203	47.4833
191900	72.9041	65.9231	52.4894	48.1478
192000	72.8563	66.2006	52.7303	49.5771
192100	72.7549	66.4716	52.9402	49.5942
192200	73.3678	67.1395	55.0228	50.089
192300	73.7898	66.2053	54.6619	49.6096
192400	74.1163	67.1744	54.3668	47.9343
192500	74.425	67.5187	55.2409	47.9561
192600	74.8163	66.6978	55.9392	46.9578
192700	74.2516	66.213	55.4151	44.9106
192800	73.6456	65.2452	55.8753	44.1736
192900	73.8025	64.6571	54.9549	44.1951
193000	73.9935	63.7718	54.0381	43.3442
193100	73.8253	64.3111	52.9235	44.3819
193200	73.3734	65.7123	52.8204	45.7231
193300	73.5917	66.032	53.1011	47.4116
193400	73.5303	65.584	53.9684	47.9276
193500	72.9776	66.2616	53.0293	48.2436
193600	73.3836	66.6885	52.4708	49.8575
193700	73.9194	64.9829	52.7053	49.2298
193800	74.2953	65.5731	53.4442	48.5685
193900	74.2209	65.4217	51.7309	48.2851
194000	74.1543	65.0658	53.3532	48.2732
194100	74.1016	64.8684	53.5417	47.7644
194200	74.3138	65.9052	52.2327	49.1932
194300	73.5171	65.0714	51.9502	50.4968
194400	73.107	65.5465	54.3789	51.6073
194500	73.3534	66.2401	54.4128	51.4608
194600	73.3469	65.9794	54.6752	49.5642
194700	73.5164	65.2427	54.0379	49.3488
194800	73.6393	65.7375	53.5926	48.4495
194900	74.4695	65.7669	52.4776	48.3292
195000	74.1699	65.6295	51.4848	48.5023
195100	73.6171	65.2257	50.8715	48.8389
195200	73.1757	65.3728	51.6576	48.4985
195300	73.5378	66.4973	52.5271	47.4515
195400	73.7147	65.4636	53.8389	45.7336
195500	73.8701	65.4448	54.0231	46.4357
195600	74.484	66.1117	55.5881	47.2729
195700	74.9171	66.8743	57.2488	48.5905
195800	75.0436	66.3765	56.0165	50.34
195900	74.4825	68.0216	53.6241	51.016
196000	74.309	68.2693	54.8603	50.0793
196100	73.8331	68.9892	54.2693	50.474
196200	73.7577	67.9675	54.2433	49.9459
196300	73.6481	67.6033	54.7713	48.7106
196400	73.7646	66.6837	57.109	49.1864
196500	73.9811	67.7243	55.6048	48.8894
196600	74.1918	68.1171	56.0851	48.3645
196700	73.9774	68.7461	54.1582	47.8761
196800	74.0027	68.6883	54.8023	48.5986
196900	73.583	69.2962	53.4276	48.9255
197000	73.5045	67.5571	54.3922	49.6466
197100	73.4938	66.2199	54.0465	49.5579
197200	73.5449	66.4612	54.2878	49.2562
197300	73.5923	66.6942	54.1778	49.113
197400	73.9416	66.2836	54.4284	47.7201
197500	74.0512	66.588	55.2813	47.639
197600	74.2978	66.7669	54.5549	47.5276
197700	74.0345	66.9099	55.5479	48.5381
197800	73.5125	67.0153	55.1591	48.589
197900	73.8068	67.0854	54.3272	48.7632
198000	73.405	67.2288	53.8469	49.5344
198100	73.3339	66.5295	54.1485	49.3647
198200	73.5037	66.103	53.1616	47.8944
198300	73.7645	65.5375	53.8837	48.2034
198400	73.0544	65.0725	55.3934	48.7757
198500	73.2226	64.2536	55.6794	47.4767
198600	73.2398	63.8032	55.9102	47.8359
198700	73.3211	64.4723	57.0651	47.9702
198800	73.6656	64.6189	55.821	47.7846
198900	74.5854	64.9328	54.8961	48.6987
199000	74.8907	65.1282	55.3055	48.378
199100	74.9753	66.3416	54.8327	48.3477
199200	74.7976	66.0729	56.0064	48.2687
199300	74.851	66.1714	56.9012	48.0096
199400	75.0059	66.0723	56.5966	46.1306
199500	75.3501	67.5871	54.8878	46.0852
199600	75.2099	67.6637	54.3704	47.2037
199700	75.5246	67.2386	52.9355	48.5944
199800	75.0431	66.7487	52.6547	49.6851
199900	74.1065	67.0698	53.3616	50.9128
[truncated: 8,000 more rows]
