# Supplementary material
Source: ML conference proceedings conference paper supplement (https://openreview.net/forum?id=4BsrGHtvW5)
Supplement: supplementary_material [file countpart.xls]

## Sheet: countpart
0	0	0	0	0
100	0.00538321	0	0	0
200	0	4.00563	0	0
300	0	0	0	0
400	0	0.0111972	0	0
500	0	0	0	0
600	0.0319301	3.01677	0	0.00458057
700	0	0	0	2.00534
800	0	0	0	0
900	0	0	0	0
1000	0	0	0	0
1100	0	0	0	0
1200	0	0	0	1.00916
1300	0	0	0	0
1400	0	0	0	0
1500	0	0	0	0
1600	0	0	0.0220659	0
1700	0	0	0	0
1800	0	2.05032	0	0
1900	0	1.05312	0	0.0145906
2000	0	0	0	0
2100	0	0	0	1.01616
2200	0	0	0	1.01695
2300	1.12245	2.06436	0	0
2400	0	0	0	0
2500	0	0	0	0
2600	0	0	0	4.02012
2700	0	0	5.03742	0
2800	0	0	0	0
2900	0	0	0	0
3000	0	0	0	0
3100	0	0	0	0
3200	0	0.0897489	0	0
3300	0	0	0	0.0257582
3400	0	0	1.0473	0
3500	0	0	0	0
3600	0	0.101073	0	0.0282033
3700	0	0	0	0
3800	0	0.106745	0.0529741	0
3900	0	0	0	0
4000	0	0	0	0
4100	0	0	0	0
4200	0	1.11811	1.05868	0
4300	0	0	0	0
4400	0	0	0	0
4500	0	0	0	0
4600	0	0.129495	0	0
4700	0	0	0	0
4800	0	0	0	0
4900	1.26167	0	2.06872	0
5000	0	0	0	0.0398552
5100	0	0	0	1.0407
5200	0	0	0	0
5300	0	0	0	0
5400	0	0	0	0
5500	0	0	0	0
5600	0	0	0	0
5700	0	0	0	0
5800	0.31007	0	1.08175	0
5900	0.315455	0	0	0
6000	0	0	0	0
6100	0	0	0	0
6200	0	0	0.0875782	3.05016
6300	0	0	0	0
6400	0	0	3.0905	0
6500	0	0	0	0
6600	0	0	0	0
6700	0	0.189703	0	0
6800	0	0	0	0
6900	0	0	0	0
7000	0	0.198362	0	0
7100	0	0	0	0
7200	0	0	0	0
7300	0	0	0	0
7400	0	0	0	0
7500	0	0	0.106706	0
7600	0	0	0	1.06254
7700	0	0	0	1.06344
7800	0	0	0	0
7900	0	0	0	0
8000	1.42885	0	0	0
8100	0	0	0	0
8200	0	0	0	0
8300	0	0	0	0
8400	0	0	0	0.0697951
8500	0	0	0	0
8600	0	0	0	0
8700	0	0	0	0
8800	0	0	0	0
8900	0	0	0	0
9000	0	0	0	0.0753179
9100	0	0	0	0
9200	0	1.2623	0	0
9300	0	0	0	0
9400	0	0	0	0
9500	0	0	0	0
9600	0	0	0	0
9700	0	0	0	0
9800	0	0	0	0
9900	0	0	0	0
10000	0	0	0	0
10100	1.54283	2.28868	0	0.0856281
10200	0	0	0	0
10300	0	1.29456	0	0
10400	0	0	0	0
10500	0	0	2.47303	0
10600	0	0	0	0
10700	0	0	0	0
10800	0	0	0	0
10900	0	0	0	0
11000	0	1.31519	0	0
11100	0	0.318139	0	0
11200	0	0	0	0.0961764
11300	0	0.32405	0	0
11400	0	0	2.04503	0
11500	0	0	0	6.09909
11600	0	0	1.16703	0
11700	0	0	2.22717	0
11800	0	0	0.286698	0
11900	1.64099	0	1.3456	0
12000	0	0	0	0
12100	0	0	0	0
12200	0	0	0	0
12300	0	0	0	0
12400	0	0	0	0
12500	0	0	0	0
12600	0	0	0	0
12700	0	0	0	0
12800	0	0	0	0
12900	0	0	5.89455	0
13000	0	0	0.944955	4.11395
13100	0.706665	0	0	1.11495
13200	0	0	0	0
13300	0	0	2.09069	0
13400	0	0	0	0
13500	0	0	0	0
13600	0	0	0	0
13700	0	0	1.27158	1.12103
13800	0	0	0	0
13900	0	0	0.355981	0
14000	0.75604	0.404481	5.39662	1.12409
14100	0.761533	0.407482	0	0
14200	0	0	0	0
14300	0	0	1.51211	0
14400	2.77802	0	0.54843	0.128204
14500	0	3.4195	2.58364	0.129237
14600	0	0.422512	2.61774	0
14700	0	0	0	0
14800	0	0	0	0
14900	0	0	0	0
15000	0	0	0	0
15100	0	1.43758	0	0
15200	0	0	0	0
15300	0	0	0	0.137568
15400	0	0	1.84933	0
15500	0	0	0	0
15600	0	0	0	0
15700	2.84959	0	3.91691	0
15800	0	0.458748	0	0
15900	0	0	0	0
16000	0	0	0	0
16100	0	0	0	0
16200	0	0	3.0059	0
16300	0	0	6.02015	0
16400	0	0	0	0
16500	0	0	0	0
16600	0	0	0.0558428	0
16700	0	0	0.0654042	0
16800	0	0	3.07381	0
16900	0	0	5.08105	0
17000	0	0	0.0871509	0
17100	0	0	1.09211	0
17200	0	0	0	0
17300	0	1.50436	0	0.158933
17400	0	1.50742	0.100231	0
17500	0	0	0.100718	3.16111
17600	0.954565	0.513532	0.100111	0
17700	0	3.51659	0	0
17800	0	0	0	0
17900	0	0	0.0918534	0
18000	0	0	0.0869966	0
18100	0	0	2.08111	0
18200	0	0	0.0742094	0
18300	0	0	0.0663086	0
18400	1.9989	0	0.057424	0
18500	0	0	0	0
18600	0	0	0.0367686	0
18700	0	0	0	0
18800	0	0	0	0
18900	1.02665	0	0	2.17657
19000	0	0	2.98441	0
19100	0.037759	2.55958	0	0
19200	0	0	0.953	0
19300	0.0488724	0	0	0.181055
19400	0	0.568832	0	0
19500	0	0	1.89981	0
19600	0	0	0	0.184439
19700	0	0	0	0
19800	0	0	0.839854	0
19900	0	2.58428	0	2.18784
20000	0	0.58738	0	0
20100	0	0	2.77374	0
20200	0	0	0	0
20300	0	0	0	0.192398
20400	0	0	1.70212	0
20500	2.11566	0	4.67714	0
20600	0	0	0	0
20700	0	0	0	0
20800	0	0	0	0
20900	0.137955	0	0	0.199294
21000	0	0	1.54512	0
21100	0	0	0.517482	0
21200	0	0	0	0
21300	0.160274	0	0	0.203928
21400	0	0	0	0
21500	0	0	0	0
21600	0	3.60794	0	0.207423
21700	0	0	1.34528	0
21800	0	2.72789	1.31578	0
21900	0	0	0.286133	0
22000	0	0	0	0.212109
22100	0	0	4.2265	1.21329
22200	0	0	4.19657	0
22300	0	0	0	0
22400	0	0	2.13664	0.216825
22500	0	0	0	0
22600	0	1.18239	0.0767928	0
22700	1.23854	0.236	0	0
22800	0	0	1.01727	0.22157
22900	0	1.34087	0	0
23000	0	0	0	0
23100	0	0.442473	0	0
23200	0	0	0.900134	0
23300	0	0	0	0
23400	0	0	0	0
23500	0	0	0	0
23600	0	0	0	0
23700	0	2.7263	0	0.232355
23800	0	0.770381	0	0
23900	0	0	0	0
24000	0	0.855642	5.67989	0
24100	3.31704	2.8968	0	0
24200	0.322659	0	0	0
24300	0	0	0	0
24400	0	0	1.58037	0
24500	1.33951	0	0	3.24207
24600	0	0.0873733	0	0
24700	0	0	4.51179	1.24451
24800	0	0	0	0
24900	0	0.189187	1.46934	0
25000	0	5.22099	0.449169	0
25100	0	0.251701	0	0.249425
25200	0	0	0	0
25300	0	1.30986	0	0
25400	0.390143	1.3373	0	1.25313
25500	0	1.36363	1.35986	0
25600	0.401406	0.388858	0	0
25700	2.40704	0.412975	0	0
25800	0	2.43598	1.31632	0
25900	0	0.45787	0	0
26000	0	0	1.29184	0
26100	0	0.498306	0.281028	0
26200	3.43522	2.51685	0.271191	0.263087
26300	0	6.53428	0	1.26434
26400	0	0	0	0
26500	0	0.565804	0.247723	0
26600	0	0	0	0
26700	0	0	0	0.26937
26800	0	0	0	0
26900	0	0	0	0
27000	0	0	0.229796	0.273161
27100	0	0	0	0
27200	0.491682	2.64142	0.230407	0
27300	0	2.64788	0	1.27697
27400	0	0.653279	0	0
27500	0.508641	0	0	0
27600	0	0.660905	1.24557	0
27700	0	0	1.25234	0
27800	0	0	0	0
27900	0	0.664574	0	0
28000	0	6.66377	0.279934	0
28100	0	0	0	0
28200	0	0	0	0
28300	1.55392	0.655409	8.31866	1.28978
28400	0	0.650689	0.334077	0
28500	0	3.64502	0	0
28600	0.570914	2.63843	0	0
28700	0	0	0	0
28800	0.582251	0.622503	0.408418	0
28900	0.587921	0	0	1.29755
29000	0	0.603039	0.453246	0
29100	1.59926	4.59202	0	0
29200	2.60494	2.58017	0.503202	0
29300	0	0	0	1.30276
29400	0	0	0.558289	0
29500	0	3.53978	0	0
29600	0	1.52478	0	0
29700	0	0	0	0
29800	0	0.492554	0	0
29900	0	0	0	0
30000	0	4.45753	0	0
30100	0	0.752561	0	0
30200	1.66174	0	0	0
30300	1.66742	0.331717	0	0
30400	0	2.61236	0	0
30500	0	0.88478	3.9521	0
30600	0	0	0	0
30700	0	2.39836	0	0
30800	0	6.63637	0.0855612	0
30900	0	3.85985	0	0
31000	0	6.06738	0	0
31100	0	7.25761	0	0
31200	0	6.4293	0	0
31300	0	3.58127	0	0
31400	2.73004	5.71243	0	0
31500	0	5.82183	0.438109	0
31600	0	3.90857	0	2.3333
31700	0	3.97189	0	0.334651
31800	0	9.01114	0	0
31900	0	3.02577	0	0
32000	0	4.01535	0.723166	0
32100	0	0	0	0
32200	0	1.91828	0	0
32300	0	3.83135	0	0
32400	0	3.71885	0	0
32500	0	2.58095	0	0.345505
32600	0	3.41794	0.0985067	0
32700	0	2.2302	5.16432	0
32800	0	6.01825	0	0.349604
32900	2.81564	2.78271	0	0
33000	0	2.52432	0	0
33100	0	2.2439	0.436112	0
33200	2.8328	0	1.50608	0
33300	0	5.62079	0.576804	0
33400	0	1.28024	0	0.35785
33500	0	0	4.72044	0
33600	0	0	2.7933	0
33700	2.8614	0	0	0
33800	0	0	0	0
33900	0	0	0.0157281	0
34000	0	0	0	0
34100	0	0.474712	1.16697	0
34200	1.89003	0	3.24339	0
34300	0	0	1.32032	0
34400	0	0.127369	1.39771	0
34500	0	0	0.475549	0
34600	0	0	1.5538	0
34700	0	0	0.632443	0
34800	0	0	1.71144	0
34900	0.930166	0	1.79077	0
35000	0	0.402226	0	0
35100	0	0	2.95028	0
35200	1.94738	0	2.03042	0
35300	0	0	0	0
35400	0	0	1.19128	0
35500	0.964606	0	2.27196	0
35600	0	0	6.35275	0
35700	0.976094	0	1.43362	0
35800	0	0	2.51456	0
35900	1.98759	0	6.59553	0
36000	0	0	2.67649	0
36100	0	0	0.757413	0
36200	1.00483	0	3.83827	0
36300	2.01059	0	2.91904	0
36400	1.01634	0	4.99968	0
36500	0.0220913	0	4.08016	2.40144
36600	0	0	2.16046	0
36700	0	0	1.24053	0
36800	0.0393576	0	0	0
36900	1.04512	0	7.3999	1.40719
37000	0.0508737	0	2.47914	0
37100	0	0	2.55804	0
37200	0	0	5.63656	0.411511
37300	4.06816	0	3.71468	0
37400	0	0	3.79237	0
37500	0.0796824	0	5.8696	0.415853
37600	0	0	3.94634	0
37700	0	0	4.02256	0
37800	0	0	5.09823	0
37900	0	0	8.17332	0
38000	0	0	5.24781	0
38100	0	0	6.32165	0
38200	0	0	1.39484	0
38300	0	0	5.46733	0
38400	0.131604	0	10.5391	0
38500	0.137378	0	2.61012	0
38600	1.14315	0	4.68037	0
38700	0	0	0.749819	0
38800	0	0	3.81844	0
38900	0	0	5.8862	0
39000	0	0	4.95309	0
39100	0.172046	0	5.01907	0
39200	2.17783	0	3.08411	0
39300	0	0	8.14821	0
39400	0	0	9.21132	0
39500	1.19518	0	9.27343	0
39600	3.20096	0	5.33451	0
39700	0	0	4.39455	0
39800	0.212538	0	5.45351	0
39900	0	0	12.5114	0
40000	0	0	7.56813	0
40100	0.229907	0	6.62375	0
40200	0.235699	0	7.67821	0
40300	0	0	5.73149	0
40400	0	0	0	0
40500	0	0	5.83444	0
40600	0	0	11.8841	0
40700	0.264673	0	5.93245	0
40800	0	0	0	0
40900	0	0	11.0254	1.46611
41000	1.28207	0	6.06991	0
41100	0.287871	0	3.11311	0
41200	1.29367	0	6.15497	0
41300	0	0	5.19549	0
41400	1.30528	0	10.2346	0
41500	0	0	9.27243	0
41600	0	0	2.30881	0
41700	0	0	6.3438	0
41800	0	0	10.3774	0
41900	0.334315	0	10.4095	0
42000	2.34012	0	5.44024	0
42100	0	0	4.46951	0
42200	0.351748	0	12.4973	0
42300	0	0	4.52368	0
42400	0	0	3.54856	0
42500	0	0	8.57197	0
42600	0	0	5.59389	0
42700	0.380823	0	12.6143	0
42800	0	0	8.63325	0
42900	0	0	9.65069	0
43000	0.39828	0	5.66661	0
43100	0	0	11.044	2.49966
43200	0	0	8.41632	0
43300	0	0	7.7809	0
43400	1.42157	0	8.13502	2.5043
43500	0	0	5.47604	0
43600	0	0	8.80139	0
43700	1.43905	0	6.10861	0
43800	0.444876	0	5.39535	0
43900	0	0	14.6594	3.51206
44000	0	0	9.89861	0
44100	0	0	11.1111	0
44200	1.4682	0	12.2951	0
44300	0	0	12.449	0
44400	0	0	10.5714	0
44500	0	0	14.661	0
44600	0	0	10.7169	2.52299
44700	0	0	10.7383	0
44800	0	0	12.7245	0
44900	3.50905	0	10.6751	0
45000	0.514888	0	8.59003	1.52927
45100	0	0	9.46928	0
45200	0	0	10.3131	0
45300	0	0	10.122	0
45400	0	0	5.89662	0
45500	0	0	9.63783	0
45600	3.54995	0	9.34672	0
45700	0	0	9.02455	0
45800	0.561641	0	13.6727	1.54191
45900	1.56749	0	11.2929	0
46000	0	0	6.88685	0
46100	1.57919	0	0.456417	0
46200	0.585041	0	9.00368	0
46300	0	0	5.53079	0
46400	1.59675	0	7.04	0
46500	0	0	5.53367	1.55306
46600	0	0	2.01421	0
46700	0	0	1.4841	0
46800	0	0	3.94585	0
46900	0	0	4.402	0
47000	2.63189	0	1.8551	0.561069
47100	0	0	1.30767	0
47200	0.643608	0	1.76224	0
47300	0	5.55654	1.22125	1.56589
47400	0	4.03727	0.687117	2.56751
47500	0.661197	1.51632	0.162176	0
47600	0	0.992233	1.64867	0
47700	0	3.46353	0	0
47800	0	5.92878	2.66441	0
47900	0	8.38655	0	0
48000	0.69053	3.83543	0	0
48100	0	4.27407	0	0
48200	0	4.70115	0	1.58046
48300	0	6.11538	0	0
48400	0	6.51555	0	1.58371
48500	0	6.90049	0	0
48600	0	6.2691	0	0
48700	0	4.62036	0	0
48800	0.737513	4.95332	0	0
48900	0	9.2671	0	1.59187
49000	0.749268	4.56092	0	0
49100	0	11.8341	0	0
49200	0	11.0859	0	0.596785
49300	0	8.31604	0	0
49400	0	10.5239	0	0
49500	0	8.70929	0	0.601715
49600	0	9.8719	0	0
49700	0	10.0117	0	0.605009
49800	0	11.1285	0	0
49900	1.80221	9.22262	0	0
50000	0.8081	9.29409	0	1.60996
50100	0	16.3433	0	0
50200	0	8.37048	0	0
50300	0	11.3763	0	0
50400	3.74201	14.3612	0	0
50500	0.969097	7.32586	0	0
50600	0	11.2711	0	0
50700	0.410836	11.1978	0	0
50800	2.62417	9.10677	0	0
50900	7.83162	4.99909	0	0.624907
51000	3.03257	4.8758	0	0
51100	0.226415	8.73805	0	0.628245
51200	3.41257	10.587	0	0
51300	2.59047	8.42402	0	0
51400	2.75957	10.2503	0	0
51500	2.91936	9.06723	0	0
51600	2.06934	11.8762	0	0
51700	0.209044	8.67856	0	0
51800	1.33803	4.47583	0	0
51900	2.45589	11.2694	0	0
52000	3.56224	9.06081	0	0
52100	4.65672	7.10306	0	1.64503
52200	6.73901	7.14406	0	0
52300	1.80882	6.18377	0	0
52400	4.8659	7.2222	0	0
52500	5.91001	2.25933	0	0
52600	4.94096	7.29514	0	0
52700	1.9586	8.32963	0	0
52800	4.96279	9.36279	0	0.65687
52900	3.95345	6.39461	0	0
53000	3.93051	7.42507	0	0
53100	3.89397	6.45417	0	0
53200	3.84382	11.4819	0	0
53300	1.78011	10.5083	0	0
53400	2.70292	8.53325	0	0
53500	6.61236	7.55684	0	0
53600	1.50858	10.579	0	0
53700	1.39176	9.59983	0	0
53800	5.2621	7.61922	0	0
53900	3.11985	7.6372	0	0
54000	2.96527	6.65377	0	0
54100	3.79867	9.66893	0	0
54200	3.62038	7.68267	0	0
54300	2.43076	11.695	0	1.6825
54400	7.23018	4.70589	0	0
54500	2.01906	9.71537	0	0
54600	1.79784	13.7234	0	0
54700	0	7.73007	0	0
54800	1.32692	10.7353	0	1.69111
54900	0	7.73908	0	0
55000	0.821335	6.74147	0	0
55100	0	7.74244	0	0
55200	2.28531	0.742005	0	0
55300	1.00727	9.74016	0	0
55400	0	11.7369	0	0
55500	1.43404	4.73227	0	0
55600	2.14004	2.72624	0	0
55700	0	8.71882	0	0
55800	0	10.71	0	0
55900	0	5.69986	0	0
56000	0	3.68833	0	0
56100	0	7.67544	0	0
56200	0	7.6612	0	0
56300	0	7.64563	0	0
56400	0	7.62873	0	0
56500	0	2.6105	0	0
56600	0	8.59098	0	0
56700	0	9.57015	0	0
56800	0	9.54804	0	0
56900	0	8.52465	0	0
57000	0	10.5	0	0
57100	0	7.47412	0	0
57200	0	9.44699	0	0
57300	0	7.41865	0	0
57400	0	7.38909	0	1.73654
57500	0	9.35835	0	0
57600	0	10.3264	0	0
57700	0	6.29335	0	0
57800	0	9.25913	1.82591	0
57900	0	7.22378	0	1.74539
58000	0	7.18731	0	1.74717
58100	0	10.1498	0	0
58200	0	6.11113	0	0
58300	0	8.07144	0	0
58400	0	7.03071	1.451	0
58500	0	9.98896	0	0
58600	0	4.9462	0	0
58700	0	6.90247	0	0
58800	0	11.8578	0.0469807	0
58900	0	5.81213	0.407256	0
59000	0	4.76556	2.74826	0
59100	0	3.7181	0	0
59200	0	9.66975	0.365803	0
59300	0	12.6205	0.639349	0
59400	0	6.57049	2.88766	0
59500	0	7.51963	2.10962	0
59600	0	11.468	2.30427	0
59700	0	3.41553	4.47083	0
59800	0	9.36235	2.60871	0
59900	0	6.30843	2.71747	0
60000	0	6.25381	0.796885	0
60100	0	6.19851	1.8469	0.784781
60200	0	0.142551	0	0
60300	0	15.086	2.85945	0.788398
60400	0	9.02874	0.822817	0
60500	0	7.97094	1.75843	0
60600	0	5.91257	1.66715	0
60700	0	9.85366	2.55	0
60800	0	5.79424	0.408197	0
60900	0	7.73431	2.24308	3.79928
61000	0	4.67392	3.05616	0
61100	0	7.61308	0	0
61200	0	6.55182	0	0
61300	0	7.49017	1.38158	0
61400	0	2.42814	0	0
61500	0	6.36576	2.85608	0
61600	0	5.30305	0.576824	0
61700	0	3.24005	3.28951	0
61800	0	6.17677	0	0
61900	0	12.1132	0	0
62000	0	6.04947	0	0.81937
62100	0	6.98551	0	0
62200	0	12.9214	0	0
62300	0	4.85708	0.414654	0
62400	0	2.79265	0	0
62500	0	1.72812	0	0
62600	0	0	0	0
62700	0	8.59883	1.43896	0
62800	0	6.53412	0	0
62900	0	6.4694	0	0
63000	0	4.4047	0.462306	0
63100	0	3.34003	2.47097	0.839635
63200	0	4.27542	0.480049	0
63300	0	5.21088	0.489522	0
63400	0	0	0	0
63500	0	2.08216	0	0
63600	0	1.01801	0	0
63700	1.09319	3.95404	0	0
63800	0	3.89025	0	0
63900	0	3.82669	0	0
64000	0	3.76336	0	0.856344
64100	0	4.70029	1.57741	0
64200	3.44631	2.6375	1.58964	0
64300	3.03188	3.57501	0	0
64400	1.56305	3.51284	0.614724	0
64500	2.03008	1.45102	0	0.865677
64600	2.42436	0	0	0
64700	2.73862	3.32847	0	0
64800	4.96709	0	0	0
64900	5.1056	7.20753	0.680284	0
65000	3.15173	6.14771	0	0
65100	3.10481	0	1.70726	0
65200	5.96595	9.02946	0	1.8788
65300	5.73804	0.971068	0.734465	0
65400	2.42562	0	0	0
65500	3.03483	2.85583	0	0
65600	3.57324	0	0	0
65700	2.04968	2.74278	0.788962	0
65800	1.47404	2.68711	0	0
65900	0	1.63204	0	0
66000	0.20994	2.57757	1.82938	0
66100	0	2.52373	0	2.89578
66200	0	2.47052	0	0
66300	0	1.41797	1.8689	0
66400	0	2.36609	2.8818	0
66500	0	6.31489	0.894531	0
66600	0	0.264375	0	0
66700	0	1.21457	0	0.907162
66800	0	1.16548	1.9316	0
66900	0	4.11712	1.94352	1.91097
67000	0	2.0695	0.955205	0
67100	0	2.02264	0.966635	0
67200	0	1.97653	0	0
67300	0	5.9312	0	0
67400	0	1.88665	0.99926	0
67500	0	2.84288	0	0
67600	0	1.79992	0.019484	0
67700	0	2.75777	1.0291	0
67800	0	0	0	0
67900	0	2.67591	1.04727	0
68000	0	0	0	0
68100	0	1.59738	0	0
68200	0	2.55937	0	0
68300	0	0.522208	0	0
68400	0	5.4859	1.08599	0
68500	0	0	0.0924962	0
68600	0	0	1.09856	0
68700	0	0	0.104183	0.945464
68800	0	2.34928	0.109346	0
68900	0	1.3173	0.114044	3.94932
69000	0	3.28619	1.11827	0
69100	0	0.25596	0	0
69200	0	1.22661	1.12526	0
69300	0	0	0.128015	0
69400	0	1.17053	0.130264	0
69500	0	3.14382	0	0
69600	0	4.11798	0	0
69700	0	0	3.13391	0
69800	0	3.06894	0.134079	0
69900	0	5.04573	0	0
70000	0	1.0234	0	0
70100	0	0	3.13134	0
70200	0	0.981347	0	0
70300	0	0.961621	3.12678	0
70400	0	0	0.123666	0
70500	0	1.92475	0.119993	0
70600	0	0	0	0
70700	0	2.89129	2.11096	0
70800	0	0	4.10559	0
70900	0	0.861211	0.099659	0
71000	0	0	0	0
71100	0	4.83445	0.0860849	0
71200	0	0	0	0
71300	0	0	3.07023	0
71400	0	0	0	0
71500	0	4.7907	1.0521	1.12771e-05
71600	0	0	0	0
71700	0	5.77358	0.0316966	4.00395
71800	0	0	0	0
71900	0	4.75954	0	0
72000	0	0.753653	0	1.00986
72100	0	0	0	0
72200	0	0.744091	0	0
72300	0	0	0	0
72400	0	0.737411	0.942651	0
72500	0	0.735124	0	0
72600	0	0.733525	0	0
72700	0	1.7326	2.89629	0
72800	0	2.73234	1.87978	0
72900	0	0	0	0
73000	0	0.733759	0	0
73100	0	2.73541	0.827143	0
73200	0	1.73768	0	1.75602
73300	0	0	1.78953	2.1112
73400	0	0	0	1.45743
73500	0	0	1.74997	0
73600	0	6.75262	0	1.11257
73700	0	3.75775	0	4.41646
73800	0.439963	0	1.68711	0.701376
73900	0	2.76958	0.665254	0.965099
74000	0.0118767	0.776262	0	3.20553
74100	0	0.783426	1.62023	0
74200	0	0.791062	0	0.608959
74300	0	0	2.57353	3.76857
74400	0.12259	0	0	2.89817
74500	0.390341	0.816648	0.525238	0
74600	0.653115	0	0	2.06264
74700	0.910425	0	0	2.09567
74800	0	0.845928	0	4.09501
74900	0	0	0	1.06027
75000	1.64493	0	2.39805	1.99126
75100	0	0	0	1.88803
75200	2.099	0.889977	1.34484	1.75082
75300	0.314136	3.90178	0.317769	0
75400	1.52083	0.913862	0	0
75500	3.71872	1.92621	0	1.14092
75600	1.90748	0	0.23489	0.874407
75700	3.08681	1.95165	2.20674	1.57821
75800	3.25642	4.9647	0.178358	3.25375
75900	3.41604	0	0	0
76000	2.56543	2.9914	0	0
76100	2.70438	0	0	0
76200	0.832702	2.01878	0.0626798	0
76300	4.95023	3.03268	0	1.26855
76400	6.05684	2.0467	0	0
76500	5.1524	3.06083	0.974042	0
76600	1.23685	0	0	0.861495
76700	4.31013	2.08933	0	0
76800	6.3722	1.10367	0	0
76900	3.42308	0	0	0
77000	4.46278	1.13247	0	0
77100	2.49136	0	0	0
77200	4.5089	1.1613	0	0
77300	6.51552	2.17568	0	0
77400	5.51135	2.19004	0	0
77500	3.49655	1.20434	0	0
77600	7.47131	0	0	0
77700	4.43585	2.23272	0	0
77800	4.3904	3.24677	0	0
77900	0	0.26071	0	0
78000	3.27063	5.27452	0	0
78100	2.1969	2.28819	0	0
78200	5.11439	4.30171	0	0
78300	5.02343	0	0	0
78400	4.92442	1.32822	0	0
78500	2.81774	2.34119	0	0
78600	6.7038	4.35395	0	0
78700	2.58303	4.36649	0	0
78800	2.45589	0.378788	0	0
78900	3.32283	0	0	0
79000	0	1.40263	0	0
79100	2.04086	1.41415	0	0
79200	2.89294	0	0	0
79300	0	1.43631	0	0
79400	2.58579	2.44694	0	0
79500	2.42759	1.45724	0	0
79600	2.26703	0	0	0
79700	0	1.47685	0	0
79800	3.94096	3.48613	0	0
79900	1.77653	1.49505	0	0
80000	1.6119	4.5036	0	0
80100	2.61803	0.511765	0	0
80200	4.62415	1.51954	0	0
80300	0.630276	0	0	0
80400	2.6364	4.53388	0.580031	0
80500	2.64253	0	0	0
80600	3.64865	1.54655	1.58507	0
80700	2.65478	2.55224	0	0
80800	1.66091	1.55748	0	0
80900	0.667038	0.562285	0	0
81000	0	1.56663	0	0
81100	3.6793	4.57051	2.59771	0
81200	0	4.57393	0.600235	0
81300	1.69156	1.57687	0	0
81400	3.69769	0.579336	0	0
81500	1.70382	1.58131	0	0
81600	0.709957	3.5828	0.610367	0
81700	0.71609	0	0	0
81800	2.72222	0	2.61544	0
81900	5.72836	6.58429	0	0
82000	1.7345	0.58378	0	0
82100	0	3.58276	0	0
82200	8.74677	0.581227	0	0
82300	0	0	0	0
82400	1.75904	2.57661	0	0
82500	1.76518	0.573531	0	0
82600	0	0	0	0
82700	2.77746	2.5658	0	0
82800	1.7836	0.561151	0	0
82900	1.78974	3.55598	0.643436	0
83000	1.79588	0.550281	0	0
83100	1.80203	5.54406	0	0
83200	1.80817	1.53732	0	0
83300	0.814313	0.530049	0.653653	0
83400	1.82046	1.52226	0	0
83500	0	0.513951	0	0
83600	1.83275	0	0.661329	0
83700	1.83889	0.495778	0	0
83800	0.84504	0.485918	0	0
83900	0.851187	1.47555	0	0
84000	1.85734	0	0	0
84100	0.863484	0	0	0
84200	3.86963	7.44139	0	0
84300	1.87578	3.429	0	0
84400	5.88193	1.41612	0	0
84500	0	2.40275	0	0
84600	1.89423	0	0	0
84700	0.900387	0.374554	0.689572	0
84800	1.90654	1.35974	0	0
84900	1.91269	1.34446	0	0
85000	1.91885	0	0	0
85100	3.925	1.31251	0.699879	0
85200	1.93116	1.29586	0	0
85300	4.93731	3.27876	0	0
85400	2.94347	0	0	0
85500	2.94962	4.24325	0	0
85600	1.95578	1.22486	0	0
85700	0.96194	0.206058	0	0
85800	6.9681	0	0	0
85900	0	0	0	0
86000	0.980417	0	0	0
86100	1.98658	0.126841	1.72573	0
86200	1.99274	0	2.72833	0
86300	1.9989	0	0	0
86400	1.00506	2.06347	2.73351	0
86500	1.01122	1.04165	0	0
86600	6.01739	0	0	0
86700	5.02355	2.99699	0	0
86800	2.02972	0.974179	0	0
86900	3.03588	0	0	0
87000	3.04205	3.92765	5.74911	0
87100	1.04821	0	0	0
87200	4.05438	4.87997	0	0
87300	1.06055	2.85573	0	0
87400	2.06671	0.831233	0	0
87500	0.0728818	0.806493	0	0
87600	8.07905	0	0	0
87700	2.08522	0.756327	0	0
87800	5.09139	0.730924	0	0
87900	4.09756	2.70532	0	0
88000	2.10373	0	0.775197	0
88100	4.1099	3.65357	0.777812	0
88200	2.11608	0.627439	0	0
88300	4.12225	1.60116	3.78305	0
88400	3.12842	0.574738	0	0
88500	1.1346	0	0	0
88600	2.14077	4.52152	0	3.91172
88700	3.14695	0	0	0
88800	1.15312	0	0	0
88900	2.1593	3.44095	0	0
89000	0.165475	0.413937	0	0
89100	1.17165	0.38687	3.80404	1.82304
89200	3.17783	2.35976	0	0.141591
89300	2.18401	0	0	2.43527
89400	3.19019	0.305453	0	0
89500	1.19637	2.27828	0	0
89600	4.20255	1.25111	0	3.15521
89700	1.20873	2.22396	0	4.33834
89800	1.21491	0.196842	0	5.49191
89900	3.22109	0.16976	0	1.6155
90000	3.22727	1.14273	0	0
90100	3.23346	0.146932	0	0
90200	2.23964	3.15114	1.83302	3.80506
90300	4.24582	0.155341	0	3.80832
90400	2.25201	5.15955	0	0.782324
90500	1.25819	0	1.84095	0
90600	2.26438	0.167967	0	0
90700	3.27056	0	0	3.53662
90800	2.27675	0.176392	0	3.40229
90900	2.28294	0	0	0
91000	2.28913	1.18482	0	1.06293
91100	2.29531	2.18904	0.85685	0.86107
91200	6.3015	1.19326	0	0
91300	2.30769	0.197481	0	0
91400	3.31388	0.201703	0	0.14844
91500	2.32007	0.205928	1.86747	0
91600	0	0	0	0
91700	0	0.214381	0	2.31814
91800	2.33865	0	0.875449	0
91900	3.34484	2.22284	7.87811	0
92000	1.35103	0.227072	1.88077	0
92100	4.35723	1.23131	0.883439	0
92200	5.36342	0	0	0
92300	2.36962	0.239777	0	0
92400	3.37581	0	0	0
92500	0.382006	0	0	0
92600	2.3882	2.2525	0	0
92700	2.3944	1.25674	0	0
92800	5.4006	0.260983	0	0
92900	4.40679	0	0	2.45029
93000	2.41299	1.26948	0	0
93100	2.41919	0.273726	0	0
93200	4.42539	0	0	0
93300	1.43159	1.28223	0	0.459228
93400	2.43779	0	0	1.46147
93500	3.44399	0	1.92087	0
93600	3.45019	0.294995	0	0
93700	1.45639	0	0	0
93800	4.4626	0.303514	0	0
93900	1.4688	2.30778	0.931603	0
94000	2.475	1.31204	0.93429	0
94100	2.48121	0.316303	0	0
94200	0.487412	2.32057	0	0.479415
94300	2.49362	0.324838	0	0
94400	1.49982	0	0	0
94500	2.50603	0	0	0
94600	1.51223	0.337651	2.95044	1.48842
94700	2.51844	2.34192	0	2.49067
94800	3.52465	2.3462	0	0
94900	4.53086	1.35048	0.958529	0
95000	1.53707	0.354757	0	0.497435
95100	2.54327	0	0	0
95200	4.54948	1.36332	0	0
95300	3.55569	1.3676	0	0
95400	2.5619	0	0	0
95500	0	3.37617	5.97474	0
95600	1.57433	0	1.97745	0
95700	2.58054	0	0	0
95800	1.58675	0.389043	0	0
95900	2.59296	0.393336	0	0.517793
96000	2.59918	1.39763	0	0
96100	2.60539	0.401927	0	0.522329
96200	0.611605	0.406224	0.993712	0
96300	2.61782	0	1.99643	0
96400	0.624035	0.414824	0.999143	0
96500	5.63025	3.41913	0.00185991	1.53141
96600	0.636467	0	0.00457819	0.533689
96700	0.642684	0	0	0
96800	1.6489	0.432043	0	0
96900	2.65512	4.43635	0	0
97000	5.66134	2.44066	0	0
97100	2.66756	0	7.01819	0
97200	0.673775	1.44929	3.02091	0
97300	4.67999	0.453601	0	0
97400	3.68622	1.45792	0	0
97500	3.69244	0	0	1.55421
97600	2.69866	0	0	0
97700	3.70488	3.47088	0	0
97800	2.7111	0	0	0
97900	2.71732	0	1.04002	0
98000	6.72355	0	0.0427587	0
98100	2.72977	0.488175	0	0.567932
98200	4.73599	1.4925	0	0.570224
98300	4.74222	0.496834	0.0509704	0
98400	3.74844	0	0	0
98500	0	0.5055	0	0
98600	2.76089	0.509835	0	2.5794
98700	2.76712	0	0	0
98800	1.77335	0.518509	0	0
98900	0	1.52285	0	0
99000	5.7858	3.52719	0	1.5886
99100	3.79203	0.531533	0	0.590897
99200	0	1.53588	0	0
99300	0.804487	1.54022	0	0
99400	0.810716	0.544571	0	0
99500	4.81695	3.54892	2.08392	0
99600	2.82318	0	0	0.602419
99700	0	0.557623	0	0
99800	3.83564	0	0	0
99900	3.84187	0.566332	0	0
100000	6.8481	1.57069	0.0977037	3.61166
100100	2.85434	6.66919	0	0
100200	1.86057	0	0	0
100300	2.8668	3.86541	0	0
100400	3.87304	0	0	0
100500	0	3.06021	0	0
100600	1.88551	1.15694	0.114279	0
100700	0.89174	0.253145	0.117046	0
100800	4.89798	6.34878	0	0
100900	1.90421	0.443786	0	0.632503
101000	1.91045	1.53811	0	0.634825
101100	2.91669	1.6317	0	3.63715
101200	1.92292	1.72451	1.1309	0
101300	4.92916	2.81649	0	0
101400	6.9354	0.907574	0	0
101500	5.94164	0	0	0.646448
101600	4.94788	5.0869	0.141998	0.648776
101700	2.95412	3.17503	0	2.6511
101800	4.96036	2.26209	0	0
101900	2.9666	2.34803	0	0
102000	3.97284	2.43279	0	0
102100	4.97908	1.51634	0.155901	0
102200	2.98532	5.59864	0	0
102300	4.99157	4.67963	0	0.6651
102400	5.99781	5.75929	0	2.66744
102500	5.00405	1.83756	3.16704	0
102600	3.01029	3.91442	1.16983	0
102700	2.01654	7.98982	1.17262	1.67445
102800	1.02278	3.06373	0	0.676792
102900	4.02903	1.13611	1.17821	0
103000	3.03527	1.20693	0	0.681476
103100	4.04152	0	0	0
103200	4.04777	3.34374	0	0
103300	2.05401	3.40968	0.189387	1.68851
103400	4.06026	0.473932	0.192185	2.69086
103500	4.06651	0	0	0
103600	2.07275	6.59727	0	6.69555
103700	3.079	0.656299	0.200586	0
103800	9.08525	4.71354	2.20339	0
103900	3.0915	2.76898	0	0
104000	4.09775	8.82258	0	0
104100	4.104	5.87433	4.2118	0
104200	1.11025	3.92421	0	0
104300	3.1165	4.9722	0	0
104400	3.12275	3.0183	0	0
104500	3.129	7.06248	1.22304	0
104600	2.13525	4.10473	1.22585	0
104700	2.14151	4.14505	1.22867	0
104800	0.14776	3.18342	0.231479	0
104900	3.15401	6.21984	0	0
105000	6.16027	8.2543	0	0
105100	2.16652	5.2868	3.23993	0
105200	3.17277	0.317328	0	0
105300	2.17903	9.34589	0.245568	0
105400	2.18528	6.37248	2.24839	0
105500	1.19154	4.39711	0	0
105600	3.1978	4.41977	0	0
105700	3.20405	2.44047	2.25686	0
105800	0	7.45922	0	0
105900	1.21657	4.47602	0	0
106000	1.22282	2.49089	0.26534	0.752226
106100	2.22908	4.50382	0	1.7546
106200	4.23534	4.51485	2.271	0
106300	2.2416	1.52397	0.273831	2.75935
106400	4.24786	4.53121	1.27666	0
106500	2.25412	3.53657	0	0
106600	0	5.54008	0	0
106700	2.26664	0.541762	0	0
106800	2.2729	4.54163	0	0
106900	3.27916	8.5397	0	0
107000	4.28542	4.53601	2.29368	0
107100	0	5.53057	0	0
107200	2.29794	1.52342	0	0
107300	2.30421	1.51457	0	1.78317
107400	4.31047	7.50407	0	0
107500	4.31673	4.49193	0	1.78794
107600	4.323	4.47819	1.31074	2.79033
107700	5.32926	4.46288	0	0
107800	5.33553	4.44603	0	0
107900	6.34179	4.42769	0	0
108000	3.34806	7.40788	0.32214	0
108100	2.35432	7.38664	1.32499	0.802291
108200	4.36059	5.36401	0	0
108300	3.36685	2.34003	0	0
108400	4.37312	4.31474	4.33355	0
108500	1.37939	10.2882	0	0
108600	2.38565	0.260389	0	0
108700	4.39192	4.23141	1.34213	0
108800	4.39819	0.201297	0	0
108900	1.40446	4.17008	0	0
109000	1.41073	6.13782	1.35071	2.82388
109100	7.417	7.10455	0	4.82628
109200	2.42327	5.07033	0	0
109300	7.42954	3.03519	0	0
109400	3.43581	3.9992	3.36217	0
109500	3.44208	3.96239	0	0
109600	5.44835	1.92482	1.36791	0
109700	7.45462	2.88654	0	1.84073
109800	1.46089	3.8476	0	1.84314
109900	2.46716	6.80806	0	0.845549
110000	3.47344	3.76796	0	0
110100	6.47971	0	0	0.850375
110200	2.48598	7.6863	0	2.85279
110300	4.49226	3.64485	0	0
110400	4.49853	7.60306	0	0.857621
110500	4.5048	0	0	0
110600	0	3.51867	2.39666	0
110700	4.51735	1.47617	0	0
110800	2.52363	3.43356	0	0
110900	3.52991	1.39087	0.405307	0
111000	6.53618	3.34817	0	0.872139
111100	2.54246	3.30551	0	0.874562
111200	3.54873	5.26295	0	0
111300	9.55501	5.22054	0	2.87941
111400	2.56129	9.17833	0	1.88184
111500	3.56757	1.13639	0	0
111600	5.57384	4.09476	0	0
111700	5.58012	1.0535	0.428417	3.88912
111800	4.5864	7.01267	0	0
111900	2.59268	1.97232	0.434205	0
112000	3.59896	2.93251	0	0
112100	1.60524	7.89328	0	0.898845
112200	3.61152	0	0	0
112300	2.6178	2.8168	1.4458	5.90371
112400	2.62408	4.77965	3.4487	1.90615
112500	4.63036	0.743305	0	0
112600	5.63664	0	0.454501	0
112700	3.64293	2.67321	0	0
112800	5.64921	2.63957	3.46031	0
112900	3.65549	5.60693	0	0
113000	3.66177	4.57534	1.46612	0
113100	3.66806	4.54485	0	0
113200	4.67434	3.51551	6.47194	0
113300	2.68062	1.48736	0	0
113400	0.686907	9.46045	0	0
113500	3.69319	2.43483	0	0
113600	5.69948	2.41053	0	0
113700	3.70576	4.38762	0	0
113800	3.71205	0	0.48942	0
113900	8.71833	1.34608	0	0.942791
114000	0	5.32753	0	0.945241
114100	4.7309	4.31053	0.498174	1.94769
114200	1.73719	3.29511	2.50109	0
114300	1.74348	0	0	0
114400	3.74977	5.26915	0	3.95505
114500	4.75605	2.25868	0	0
114600	4.76234	1.24994	0	0
114700	2.76863	3.24295	0.515714	0
114800	3.77492	1.23775	0	2.96488
114900	3.78121	4.23438	2.52157	0
115000	3.7875	7.23285	0	0
115100	4.79378	2.23319	0	0
115200	1.80007	6.23545	0	0.974716
115300	3.80636	3.23963	0	0
115400	2.81265	2.24577	0.536227	0
115500	3.81895	5.25388	2.53916	0.982105
115600	1.82524	6.264	0	0
115700	2.83153	1.27613	0	0
115800	3.83782	2.29031	2.54797	0
115900	3.84411	0	0	2.99197
116000	2.8504	4.32485	1.55385	0
116100	3.8567	1.34525	0	0
116200	3.86299	4.36774	0	0
116300	3.86928	0	0	0
116400	6.87557	3.41909	4.56563	0
116500	5.88187	2.44797	0	0
116600	2.88816	3.47898	2.57152	0
116700	3.89446	2.51214	0	0
116800	4.90075	0.547458	0	0
116900	0.907045	2.58493	1.58037	0.0166966
117000	1.91334	3.62456	0	0
117100	6.91964	4.66635	0	0.0216526
117200	3.92593	3.71029	0	0.024132
117300	2.93223	5.75639	0	0
117400	6.93852	4.80465	0	0
117500	4.94482	0	0	0
117600	2.95112	0	0.601049	1.03406
117700	2.95741	0.962244	1.60401	0
117800	6.96371	4.01903	0	1.03903
117900	7.97001	2.07792	0	0.0415123
118000	5.97631	3.13891	0	0.0439988
118100	4.9826	1.20198	0	1.04649
118200	4.9889	2.26712	0	0.0489744
118300	1.9952	4.3343	0.621785	0
118400	2.0015	4.40351	0	1.05395
118500	4.0078	3.47474	0	0
118600	4.0141	4.54795	0.630688	3.05894
118700	3.0204	6.62312	0	0.0614287
118800	2.0267	3.70024	0	0
118900	8.033	4.77928	0	0.0664166
119000	2.0393	2.8602	0.642575	0
119100	4.0456	5.94298	0	0
119200	4.0519	4.0276	0	0
119300	5.0582	7.11401	0	0.0764029
119400	2.06451	4.2022	0	0
119500	5.07081	4.29212	0	2.0814
119600	5.07711	4.38374	0	0
119700	6.08341	3.47702	0	1.0864
119800	7.08972	6.57194	1.6664	0
119900	3.09602	3.66844	0	2.09141
120000	6.10232	4.7665	0.672367	0
120100	7.10863	5.86606	0	0.0964172
120200	2.11493	4.9671	2.67834	0
120300	7.12123	5.06956	0	0
120400	3.12754	8.17341	0	0
120500	6.13384	6.2786	0	1.10645
120600	2.14015	7.38508	0.690294	5.10895
120700	5.14645	5.49281	0	0
120800	5.15276	6.60173	0	0.113975
120900	2.15906	5.71182	0	0
121000	3.16537	6.823	2.70227	0
121100	3.17168	4.93524	0	0
121200	7.17798	5.04848	1.70826	2.12403
121300	4.18429	5.16268	0.711258	0
121400	3.19059	5.27777	8.71426	0
121500	4.1969	0.393717	0	0
121600	2.20321	12.5105	1.72026	0
121700	5.20952	7.62793	0	0
121800	5.21582	8.74609	0	0
121900	0.222133	6.86488	10.7293	0.141651
122000	3.22844	5.98425	0	3.14417
122100	4.23475	8.10413	0	6.14669
122200	5.24106	9.22448	0	0
122300	7.24737	3.34523	3.7413	0
122400	4.25368	14.4663	0	0
122500	4.25999	7.58772	0	0
122600	3.2663	9.70934	0	0.159316
122700	5.27261	10.8311	0	0
122800	7.27892	5.95305	0.756359	0
122900	4.28523	8.07502	0	1.1669
123000	6.29154	8.19698	0	3.16943
123100	3.29785	8.31888	0	4.17196
123200	2.30416	5.44067	0	0.17449
123300	4.31047	10.5623	0	0
123400	4.31678	6.68364	2.77447	0
123500	6.32309	10.8047	0	0.182088
123600	5.32941	8.92542	0	0
123700	6.33572	5.04571	0	0
123800	1.34203	9.16553	0	0
123900	2.34834	10.2848	1.78959	0
124000	2.35466	16.4035	1.79261	1.19477
124100	4.36097	13.5216	0	0
124200	6.36728	7.63891	0	2.19985
124300	4.3736	9.75549	0	1.20239
124400	4.37991	7.87125	0	0.204928
124500	4.38622	13.9861	5.80776	0
124600	7.39254	10.1001	0.810798	0.210012
124700	3.39885	14.213	2.81383	0
124800	2.40517	12.3249	0	0.2151
124900	4.41148	17.4357	0	0
125000	4.4178	6.5454	1.82294	1.22019
125100	6.42411	11.6538	0	1.22274
125200	5.43043	11.761	0	0
125300	0.436744	9.8669	0	2.22783
125400	4.44306	11.9714	0	0.230383
125500	1.44938	10.0745	0	0
125600	4.45569	18.1761	0	0
125700	5.46201	12.2762	0	0
125800	6.46833	15.3748	0.847282	0.240588
125900	2.47464	17.4717	1.85033	0
126000	1.48096	16.567	0	0
126100	5.48728	9.66055	0.856427	0
126200	5.4936	3.75237	0	0
126300	4.49991	12.8424	0	0
126400	4.50623	16.9306	0	4.25592
126500	9.51255	12.0169	0	0
126600	4.51887	13.1013	0	0
126700	4.52519	9.18374	0.874745	4.2636
126800	5.5315	13.2642	1.8778	0
126900	3.53782	7.34258	0	0
127000	2.54414	7.41891	0	0
127100	3.55046	12.4931	0	0
127200	4.55678	9.56521	0	0.276406
127300	5.5631	13.6351	2.8931	0
127400	3.56942	16.7028	2.89616	0
127500	4.57574	10.7683	0	0
127600	6.58206	11.8315	1.90229	0
127700	5.58838	12.8924	1.90536	0
127800	5.5947	12.951	0	4.2918
127900	6.60102	13.0072	0	1.29437
128000	4.60735	13.0611	0.914564	0.296943
128100	4.61367	13.1125	0	1.29951
128200	4.61999	11.1616	0	1.30209
128300	2.62631	12.2082	0	0
128400	3.63263	6.25235	0	0
128500	4.63895	11.294	0.929926	0.309804
128600	6.64528	18.3332	1.933	2.31238
128700	4.6516	13.3699	0	0
128800	4.65792	12.4041	0.939156	0
128900	5.66424	15.4358	0	2.32011
129000	3.67057	13.4649	0.945315	0
129100	5.67689	13.4914	0	0
129200	7.68321	11.5154	0	0
129300	3.68954	13.5369	3.95456	0.330423
129400	6.69586	16.5558	1.95764	0
129500	4.70218	8.57205	0	0.335585
129600	4.70851	13.5858	0	0
129700	4.71483	13.5969	0	0
129800	2.72115	14.6055	0	1.34333
129900	8.72748	13.6115	0	0
130000	4.7338	13.615	1.97617	0
130100	4.74013	15.8353	0	0
130200	5.74645	10.0511	0	1.35368
130300	5.75278	13.2609	0	0.356265
130400	2.7591	15.4632	0	0
130500	6.76543	15.6566	1.99164	4.36144
130600	1.77175	13.8398	0.994732	0
130700	5.77808	17.0112	1.99783	1.36662
130800	4.78441	12.1698	1.00093	3.36922
130900	5.79073	14.3142	0.00402785	2.37181
131000	7.79706	15.4432	2.00713	0
131100	4.80338	16.5559	0	0
131200	4.80971	12.6512	7.01333	0
131300	5.81604	16.7282	4.01644	0.382184
131400	4.82236	15.7861	0.0195409	0
131500	1.82869	17.8241	0	0
131600	4.83502	15.8418	1.02575	2.38997
131700	3.84134	16.8385	0	0
131800	5.84767	13.8139	1.03197	0
131900	3.854	15.7676	1.03508	0
132000	5.86033	17.6996	2.03819	0
132100	4.86666	10.6097	2.0413	1.40297
132200	4.87298	15.4981	0.0444153	0
132300	6.87931	13.3647	0	2.40818
132400	8.88564	15.2101	1.05064	0
132500	4.89197	15.0344	0	1.41339
132600	6.8983	14.8382	0.0568773	0
132700	3.90462	14.6221	0	0
132800	5.91095	9.38673	0.0631144	0.421202
132900	3.91728	15.1329	3.06623	0
133000	3.92361	16.8616	2.06936	0
133100	4.92994	8.57357	1.07248	0.429026
133200	4.93627	13.27	2.0756	2.43164
133300	4.9426	9.95191	0.0787251	0
133400	4.94893	12.6205	7.08185	0
133500	5.95526	10.2771	0	1.43947
133600	4.96159	9.92278	4.0881	0
133700	6.96792	8.55904	0	5.44469
133800	4.97425	15.1872	0.0943615	0
133900	6.98058	10.8086	1.09749	0
134000	2.98691	11.4247	0	0
134100	6.99324	11.0368	3.10376	0
134200	1.99957	9.64655	0	0
134300	9.0059	9.2552	3.11002	0
134400	5.01223	4.86419	0	0
134500	4.01856	9.47491	0	0.465623
134600	6.02489	10.0887	0.119433	0
134700	2.03123	7.70694	2.12257	1.47086
134800	4.03756	7.33083	1.12571	0
134900	6.04389	7.96164	0.128851	0
135000	6.05022	6.60052	0	0
135100	2.05655	7.24858	0.135135	0
135200	8.06288	5.90687	1.13828	0
135300	6.06922	5.57633	0	0.486599
135400	5.07555	5.25786	0.144569	0.489224
135500	8.08188	0.952258	0.147716	0
135600	7.08821	9.66023	0	0
135700	5.09454	3.3824	2.15401	2.4971
135800	6.10088	4.11929	0.157162	0
135900	5.10721	0.871341	2.16031	0
136000	5.11354	0.638888	0.163464	0
136100	7.11987	6.42217	1.16662	0
136200	3.12621	3.22132	0	1.51025
136300	5.13254	9.03639	0	1.51288
136400	8.13887	4.86732	2.17608	1.51552
136500	6.14521	3.71397	1.17924	0
136600	8.15154	0	0.182395	0
136700	5.15787	2.45337	0	0
136800	1.16421	1.34536	0.188714	0
136900	5.17054	0	4.19187	0
137000	3.17687	0	3.19504	0
137100	3.18321	4.10431	0.198199	1.53396
137200	6.18954	4.04945	0	0.536598
137300	4.19588	0	2.20453	0
137400	2.20221	3.97335	0	0
137500	2.20854	3.95038	0	1.54452
137600	4.21488	0.936237	0	0
137700	5.22121	1.92994	4.2172	0
137800	6.22755	0.930481	3.22037	3.55244
137900	8.23388	2.93684	0.223537	1.55508
138000	3.24022	1.94798	2.22671	1.55773
138100	3.24655	3.96284	3.22988	1.56037
138200	5.25289	1.98038	1.23306	0
138300	5.25922	1.99955	0.236231	1.56566
138400	5.26556	2.01931	0	2.56831
138500	9.27189	2.03865	0.242583	2.57095
138600	0	2.0566	2.24576	0
138700	5.28456	0	0.24894	0
138800	6.2909	0.0845446	0	0
138900	7.29723	0.0927701	2.2553	0
139000	4.30357	1.09607	0	0
139100	7.3099	2.09369	0.261665	0.586847
139200	4.31624	1.08495	2.26485	2.5895
139300	4.32258	2.06922	1.26803	0
139400	2.32891	2.04596	0.27122	1.5948
139500	8.33525	2.0147	0	0
139600	7.34158	3.97504	0	0.600111
139700	2.34792	1.92668	0	0.602766
139800	8.35425	4.86939	0	0
139900	4.36059	2.80301	0	0
140000	4.36693	0.72751	3.29036	0
140100	5.37326	4.6429	0.293548	0.613392
140200	2.3796	2.54931	0	2.61605
140300	6.38594	0	4.29994	0.618709
140400	2.39227	0.33606	0	0
140500	6.39861	2.21705	1.30633	0
140600	5.40495	1.09037	0	0
140700	5.41128	1.95652	4.31273	0.629351
140800	9.41762	0.816116	0	2.63201
140900	5.42396	0	1.31913	0
141000	5.43029	0.518359	0.322328	0
141100	5.43663	1.36253	3.32553	0
141200	5.44297	0.20318	0	0.642668
141300	9.4493	0	0	0
141400	6.45564	0	0.335145	0
141500	6.46198	0.713166	0.338351	0
141600	6.46832	1.54909	0	2.65333
141700	6.47465	2.38634	1.34477	0.656001
141800	5.48099	0	0	0
141900	6.48733	4.06901	0.351188	0
142000	7.49367	0	6.3544	0
142100	4.5	0	0.357612	1.66668
142200	3.50634	0	2.36083	0
142300	5.51268	0	2.36404	0
142400	5.51902	0	0.367255	0
142500	5.52535	0	0	0
142600	6.53169	0	5.37369	0.680042
142700	6.53803	0	0	0.682716
142800	0.544367	0	1.38013	1.68539
142900	5.5507	0	1.38335	0
143000	5.55704	0	0	0
143100	5.56338	1.82113	0.389791	0
143200	6.56972	0	0	0
143300	7.57606	0	1.39624	0
143400	5.58239	0	0.399464	0
143500	6.58873	0	5.40269	4.70413
143600	5.59507	0	0.405918	0
143700	7.60141	0	0.409146	0
143800	3.60775	0	0	0
143900	3.61409	0	0	1.71486
144000	6.62042	0	2.41884	0
144100	5.62676	0	0.422069	0
144200	6.6331	0	5.4253	0
144300	4.63944	1.59926	0	0
144400	3.64578	0	1.43177	0
144500	2.65212	0	3.43501	0
144600	5.65845	0	3.43824	0
144700	5.66479	0	2.44148	0
144800	5.67113	0	2.44472	3.73902
144900	8.67747	0	0	0
145000	2.68381	0	0	0
145100	5.69015	0	0	0
145200	8.69648	0	0	0
145300	2.70282	0.86179	0	0
145400	2.70916	1.1404	0	1.75516
145500	5.7155	1.42422	3.46742	0
145600	8.72184	0	0.470668	3.76055
145700	2.72818	0.00257961	3.47392	0
145800	3.73452	1.29463	0	0
145900	4.74085	1.58691	0.480414	0
146000	10.7472	1.87814	0	0
146100	5.75353	3.16707	0	2.77402
146200	6.75987	8.45244	0	0
146300	7.76621	3.73302	0	1.77941
146400	5.77255	1.00759	3.49668	0.782107
146500	5.77889	0.275003	0.499932	0
146600	2.78523	6.53411	0	0
146700	5.79156	2.78382	2.50645	1.7902
146800	4.7979	5.02311	3.5097	0
146900	5.80424	5.25101	4.51296	0.795602
147000	8.81058	9.4666	2.51622	1.7983
147100	4.81692	2.66905	0	0.801004
147200	5.82326	6.85759	0	0
147300	6.8296	3.03153	0	1.80641
147400	5.83594	7.19028	0	0.809112
147500	4.84227	8.33332	0	0
147600	5.84861	9.46023	1.53581	0
147700	5.85495	8.57067	0	1.81723
147800	5.86129	6.66439	4.54234	0
147900	3.86763	8.74126	0.545609	1.82264
148000	6.87397	7.80123	2.54888	0
148100	6.88031	5.84435	0.55215	2.82805
148200	3.88665	3.87075	2.55542	0
148300	6.89298	2.88067	0.558694	0
148400	4.89932	2.87445	0	1.83618
148500	7.90566	7.85251	3.56524	0.838886
148600	8.912	6.81536	0	2.8416
148700	4.91834	5.7636	0	10.8443
148800	4.92468	7.69789	0.575072	0
148900	5.93102	6.61901	3.57835	0
149000	8.93736	11.5278	0	0
149100	5.94369	10.4251	0	0
149200	5.95003	6.31194	2.58819	0
149300	3.95637	7.1893	0	0
149400	7.96271	6.05827	0	4.8633
149500	5.96905	3.91995	2.59804	0.866014
149600	5.97539	8.7755	0	0
149700	5.98173	6.62611	0	0.871446
149800	7.98806	5.47298	0.607899	0
149900	6.9944	5.31736	0	0
150000	6.00074	8.16046	0	0
150100	5.19531	6.18321	0.788897	0
150200	7.38905	7.20554	0	1.88504
150300	6.58151	8.22743	0	0.887757
150400	4.77225	5.24884	2.30672	0
150500	4.96083	6.26976	0.476403	1.8932
150600	6.14681	3.29014	4.64407	0
150700	7.32978	3.30997	1.80941	0
150800	6.50932	1.32922	1.97211	0.901365
150900	5.68503	6.34786	4.13185	0
151000	4.85651	3.36586	2.28835	0.906812
151100	6.0234	3.38321	0.441304	0
151200	6.18534	3.39986	2.59044	0
151300	10.342	3.41581	1.73548	3.91499
151400	7.49296	5.43103	4.87617	0
151500	8.638	1.4455	3.01226	0
151600	10.7768	7.45919	4.14352	0
151700	6.9091	4.47208	4.26971	5.92589
151800	6.03462	2.48416	5.39063	0
151900	6.15313	3.49541	5.50607	1.93135
152000	9.26443	13.5058	7.61586	0
152100	6.36833	6.51532	4.71983	0.93681
152200	11.4646	7.52396	3.81781	0.93954
152300	8.55325	5.53169	4.90967	0
152400	10.634	2.5385	3.99529	0
152500	9.70684	6.54439	0.0745493	0.947734
152600	9.77166	7.54932	4.14736	0.950467
152700	9.82842	6.5533	7.21366	2.9532
152800	8.8771	5.55631	7.27337	3.95593
152900	11.9177	3.55834	7.32645	0
153000	9.95025	6.55938	3.37288	1.9614
153100	9.9748	4.55942	5.41266	0
153200	9.99141	6.55845	3.44577	0
153300	8.00019	5.55646	5.47225	2.96961
153400	13.0013	5.55346	0.492149	0
153500	11.9948	5.54943	10.5055	0
153600	9.9809	9.54436	5.51241	0
153700	9.95982	5.53826	5.51294	0
153800	7.93176	5.53112	4.50721	2.9833
153900	9.89695	4.52294	5.49534	0.986038
154000	10.8556	2.51372	6.47746	2.98878
154100	8.80812	7.50346	6.45374	0
154200	7.75468	5.49215	2.42433	0
154300	8.69564	10.4798	7.38942	0
154400	7.63132	2.46642	8.3492	5.99974
154500	7.56209	5.452	6.30389	0.00248559
154600	4.4883	4.43655	3.25372	0.00522865
154700	9.41033	2.42008	3.1989	2.00797
154800	11.3286	12.4026	6.1397	0
154900	10.2435	5.38407	4.07637	2.01346
155000	9.15538	1.36455	3.00918	1.01621
155100	9.06477	7.34404	5.93841	0.0189517
155200	5.97207	5.32253	4.86435	0
155300	7.87771	1.30005	3.78731	0
155400	8.78216	4.27659	5.70758	0
155500	6.68587	5.25218	4.62549	3.02994
155600	8.5893	7.22682	0	0
155700	8.49291	2.20053	2.45549	0.0354362
155800	10.3972	3.17331	8.36824	1.03819
155900	8.30252	5.14519	4.27994	0.0409351
156000	9.20946	5.11618	5.19093	0.0436853
156100	10.1184	7.0863	3.10156	2.04644
156200	4.02988	2.05555	7.01216	0.0491873
156300	15.9443	7.02396	5.92309	0.051939
156400	5.86205	4.99155	7.83469	0
156500	10.7836	4.95833	3.74731	0
156600	6.70948	4.92433	2.66129	3.0602
156700	7.63999	5.88955	2.57698	0
156800	7.57556	2.85403	2.49472	0
156900	6.5166	0	0	0
157000	5.46347	4.78082	3.33769	0.0712149
157100	7.41655	8.74317	4.26357	1.07397
157200	7.37618	4.70487	6.19282	2.07673
157300	9.3427	1.66592	7.12575	2.07948
157400	6.31641	4.62635	0.0626697	1.08224
157500	4.29761	8.5862	0	2.085
157600	9.28658	8.54547	1.94965	0
157700	7.28357	3.50419	3.90028	0
157800	6.28881	3.4624	3.85603	1.09327
157900	2.30251	5.42011	0.817173	0
158000	5.32486	4.37735	3.78394	0
158100	7.35602	5.33414	1.75658	0
158200	6.39614	4.29052	0	0
158300	9.44534	1.2465	0	1.10708
158400	6.5037	4.20212	1.71184	3.10984
158500	8.57129	4.1574	0	1.1126
158600	7.64815	3.11237	3.71505	0.115364
158700	5.73431	6.06705	1.72707	1.11813
158800	7.82975	1.02148	3.74622	0
158900	7.93443	2.97567	0.772607	3.12366
159000	9.04831	2.92967	1.80635	1.12642
159100	7.17128	5.88349	1.84753	0
159200	8.30325	5.83717	5.89621	0
159300	9.44408	1.79072	1.95246	2.13472
159400	8.5936	3.74419	2.01631	0.137485
159500	10.7516	4.6976	4.08778	0.140252
159600	9.91796	5.65097	9.16686	0
159700	8.09237	1.60434	2.25355	3.14579
159800	9.27459	2.55772	2.34782	0
159900	10.4643	2.51116	0	0
160000	11.6613	4.46467	2.55885	0
160100	11.1777	5.46996	2.96779	0.449188
160200	9.69131	1.47525	7.37983	0.740111
160300	10.1936	1.48054	0	0
160400	11.676	8.48583	5.19867	0
160500	14.131	2.49113	3.5984	0
160600	11.5515	3.49642	5.98718	1.79289
160700	14.9314	7.50172	7.36184	0
160800	14.2655	3.50702	5.71939	3.20803
160900	12.5501	1.51232	12.0571	0
161000	9.78229	0	6.37252	1.51965
161100	15.9607	3.52292	4.66339	3.63118
161200	16.085	0	6.92782	7.7109
161300	13.1564	2.53353	4.16421	0.757446
161400	14.177	4.53884	0	5.76985
161500	12.1504	3.54414	9.54811	1.74745
161600	16.0808	7.54946	8.69409	3.68996
161700	13.9737	0.554767	3.80896	2.59743
161800	11.8352	2.56008	7.89281	3.47027
161900	14.6719	2.5654	6.94605	3.30924
162000	12.4912	3.57071	7.96944	2.11542
162100	14.3003	1.57603	7.96402	5.89021
162200	11.1068	3.58135	7.93115	1.63534
162300	12.9181	2.58667	9.87246	0.352783
162400	11.7411	7.59199	7.78985	0
162500	10.5825	2.59732	7.68542	3.71392
162600	17.4483	2.60264	10.5615	0
162700	12.3435	3.60797	5.42064	0
162800	12.2724	2.6133	7.26543	2.6116
162900	12.2382	3.61863	3.09864	3.2177
163000	13.2433	7.62396	6.92314	0
163100	11.2885	1.62929	6.74179	0
163200	12.3739	6.63463	7.55752	2.00156
163300	12.4982	5.63997	5.3732	0
163400	11.6593	2.6453	1.19166	0
163500	12.8537	4.65064	3.01565	0
163600	12.0773	4.65598	6.84779	0
163700	11.3251	5.66133	5.69057	0
163800	16.5914	0	5.54629	0
163900	11.8701	0.672016	7.41706	0
164000	13.1544	8.67736	3.30476	0
164100	12.4378	3.68271	3.21102	0
164200	14.7134	4.68806	5.13722	0
164300	11.9746	3.69341	11.0845	0
164400	15.2154	6.69877	5.05356	0
164500	14.4297	1.70412	1.04501	0
164600	15.6127	0.709478	5.05905	0
164700	15.7599	9.71484	7.09557	0
164800	16.8679	9.7202	6.1542	0
164900	16.9342	1.72556	3.23425	0
165000	15.9573	4.73092	2.33476	0
165100	16.937	3.73628	5.45448	0
165200	14.8739	3.74165	9.59192	0
165300	17.7698	8.74702	5.74534	0
165400	15.6274	7.75238	5.9128	0
165500	14.4504	3.75775	6.09213	0
165600	17.2434	0.763126	4.28104	0
165700	14.0117	8.7685	6.47705	0
165800	14.7612	3.77387	7.6776	0
165900	17.498	3.77925	3.88003	0
166000	14.2289	5.78463	7.08164	0
166100	11.9604	2.79001	9.2797	0
166200	13.6991	3.79539	4.4715	0
166300	16.4515	3.80077	6.65437	0
166400	11.2235	2.80616	11.8257	0
166500	9.0205	3.81154	13.9831	0
166600	13.8472	0	12.124	0
166700	11.7074	1.82232	3.24645	0
166800	12.6041	0.827707	9.3483	0
166900	12.5392	0.833098	9.42781	0
167000	12.5136	4.83849	5.48339	0
167100	11.5271	0.843886	6.51375	0
167200	14.5784	6.84928	8.51784	0
167300	11.665	3.85468	7.4949	0
167400	10.7837	2.86008	6.44446	0
167500	11.93	1.86548	8.36632	0
167600	16.0989	6.87088	10.2606	0
167700	13.2845	1.87629	12.1278	0
167800	13.4803	2.88169	6.96847	0
167900	12.6797	3.8871	5.78373	0
168000	14.8755	2.89251	8.57483	0
168100	15.0607	0	10.3433	0
168200	14.2282	5.90333	5.09094	0
168300	12.3714	6.90874	1.81975	0
168400	14.4841	4.91416	6.53197	0
168500	15.5607	4.91957	7.22999	0
168600	16.5964	4.92499	5.91639	0
168700	13.5871	3.93041	5.59387	0
168800	11.5301	3.93583	3.26521	0
168900	15.4235	3.94125	8.9333	0
169000	13.2665	0	3.60102	0
169100	14.0596	1.9521	5.27131	0
169200	13.8046	3.95753	4.94706	0
169300	13.5042	6.96296	1.63109	0
169400	11.1622	4.96839	4.32618	0
169500	12.7837	9.97382	3.03495	0
169600	11.3744	3.97925	2.75991	0
169700	9.94092	1.98469	5.50337	0
169800	9.49055	1.99012	4.26748	0
169900	8.03102	4.99556	2.05413	0
170000	7.57038	4.001	3.86501	0
170100	8.39947	4.00644	0.701525	0
170200	12.2353	3.01188	0	0
170300	10.0782	4.01732	1.45578	0
170400	10.9282	3.02277	4.37494	0
170500	6.78567	2.02821	0.322588	0
170600	7.65069	3.03366	0	0
170700	7.52342	4.03911	2.30291	0
170800	5.404	5.04456	0	0
170900	9.29252	2.05001	3.39291	0
171000	7.18907	5.05546	4.47657	0
171100	13.0937	4.06091	2.58416	0
171200	10.0064	9.06636	0.713964	0
171300	6.92733	5.07182	1.86404	0
171400	8.85633	2.07727	4.03225	0
171500	9.79343	9.08273	2.21626	0
171600	8.73857	4.08819	3.41359	0
171700	9.69167	5.09365	0	0
171800	6.65263	4.09911	0.837636	0
171900	9.62136	6.10457	3.05885	0
172000	5.5977	6.11003	3.28245	0
172100	8.58149	8.11549	4.50558	0
172200	6.57257	4.12096	0.725437	0
172300	8.57075	7.12643	3.93927	2.18619
172400	8.5758	7.13189	4.1444	1.53374
172500	3.5875	8.13736	3.33828	0.864103
172600	7.6056	3.14283	6.5185	2.17473
172700	8.62985	10.1483	3.6828	1.46326
172800	8.65996	0.153774	6.82914	0.72754
172900	8.69565	4.15925	4.9557	7.96566
173000	8.73662	5.16472	8.06088	4.17596
173100	8.78255	4.1702	5.14334	1.35704
173200	6.83311	3.17567	5.20203	5.50781
173300	9.88798	9.18115	7.23616	2.62745
173400	8.9468	1.18663	6.24525	1.71546
173500	9.00922	4.19211	3.2291	0
173600	6.07488	6.19759	5.18784	2.7962
173700	5.14343	3.20307	7.12188	2.7895
173800	7.21448	1.20856	2.03192	2.75233
173900	9.28767	4.21404	5.91897	6.68575
174000	11.3626	10.2195	4.7843	1.59111
174100	9.43894	6.22502	4.62947	5.47006
174200	9.51627	8.2305	2.45626	2.32448
174300	7.59423	3.23599	4.2667	5.15652
174400	9.67243	5.24148	4.06303	0.968539
174500	10.7505	4.24698	1.84766	1.76311
174600	8.8281	2.25247	2.62319	0.542952
174700	3.90484	2.25796	2.39231	4.31095
174800	8.98035	4.26346	4.15785	2.0701
174900	10.0543	8.26895	6.92269	1.82348
175000	14.1263	0	2.68978	3.57421
175100	10.1961	4.27995	3.71364	2.57703
175200	8.26337	2.28545	2.74197	0
175300	13.3277	4.29095	2.77454	0.582691
175400	13.3889	4.29645	3.81113	0.58552
175500	8.44656	5.30196	4.85148	0.588349
175600	11.5005	6.30746	1.89536	0.591179
175700	13.5504	4.31297	2.94252	0
175800	10.596	5.31847	2.99269	2.59684
175900	8.63719	5.32398	5.04563	5.59967
176000	10.6736	3.32949	2.10105	3.6025
176100	9.70512	0.335001	4.15869	0
176200	8.73152	5.34051	1.21829	0.608163
176300	11.7526	6.34602	0.279561	0
176400	10.7684	4.35154	8.34223	1.61383
176500	11.7785	3.35705	5.40603	3.61666
176600	11.783	2.36257	5.47067	0.619492
176700	10.7817	3.36809	3.53588	1.62232
176800	9.77455	3.37361	4.60139	0.625158
176900	13.7615	3.37912	3.66692	0.627992
177000	10.7425	2.38465	2.73219	0.630826
177100	13.7176	0.390168	10.797	0.63366
177200	13.6867	0	3.86094	2.63649
177300	10.6498	4.40121	2.92387	6.63933
177400	11.6071	4.40674	3.98551	1.64216
177500	8.55848	2.41227	4.04561	0
177600	12.5041	7.41779	4.10391	0
177700	10.444	6.42332	5.16018	0
177800	9.37831	5.42885	1.2142	0
177900	10.3072	2.43438	4.26573	0.656343
178000	10.2307	4.43992	5.31457	0
178100	11.1491	1.44545	3.3605	2.66202
178200	10.0625	3.45099	3.40334	0.664854
178300	10.9711	0	7.44289	0
178400	11.8751	5.46206	5.47897	0
178500	7.77468	7.4676	0	0.673368
178600	12.6701	4.47314	2.54009	0
178700	9.5617	4.47868	7.56482	0
178800	8.44959	4.48422	3.58548	5.68188
178900	9.33409	1.48976	4.60195	6.68472
179000	9.21547	5.4953	5.61411	0
179100	9.09401	5.50085	6.62187	0.690402
179200	7.97001	4.5064	0	0.693242
179300	6.84376	1.51194	0.623829	0.696083
179400	6.71557	4.51749	4.61789	1.69892
179500	8.58574	3.52304	5.60727	1.70176
179600	10.4546	8.52859	4.59193	0
179700	10.3224	4.53414	4.57184	0
179800	6.18961	4.5397	5.54699	0
179900	4.05641	5.54525	6.51738	2.71313
180000	7.92317	5.55081	7.48302	1.71597
180100	4.92966	1.55636	7.44394	2.88995
180200	5.93614	4.56192	4.40016	4.06324
180300	9.94263	3.56748	4.35175	1.23551
180400	7.94912	5.57304	3.29875	0.406425
180500	7.95562	5.5786	5.24124	0
180600	5.96211	4.58416	0	4.74288
180700	9.9686	7.58973	6.11304	1.90776
180800	7.97509	0	7.04255	0
180900	7.98158	4.60086	3.96795	5.2293
181000	8.98808	4.60643	2.88936	1.38534
181100	8.99457	7.61199	6.80693	4.53784
181200	10.0011	4.61756	6.7208	3.68652
181300	7.00756	6.62313	6.63112	2.83111
181400	9.01406	3.62871	3.53806	2.97134
181500	8.02056	7.63428	1.44178	3.10698
181600	8.02705	2.63985	4.34248	0
181700	11.0336	2.64543	0.240333	3.36351
181800	11.0401	3.651	3.13554	3.48397
181900	9.04655	4.65658	0.0282909	0.598951
182000	7.05305	4.66216	2.9188	5.70828
182100	8.05955	5.66774	2.80728	3.81178
182200	9.06605	1.67332	4.69395	0
182300	11.0726	4.6789	2.57902	4.0007
182400	8.07906	0	4.46271	2.08585
182500	9.08556	9.69007	2.34527	2.16465
182600	10.0921	4.69566	5.22691	2.237
182700	11.0986	4.70124	3.10786	5.30283
182800	3.10507	2.70683	4.98836	5.36208
182900	9.11158	7.71242	3.86865	2.41469
183000	10.1181	7.71801	2.74895	5.46066
183100	8.12459	4.7236	2.75252	4.49996
183200	8.1311	5.72919	4.7561	4.53261
183300	8.1376	4.73479	1.75968	3.55862
183400	7.14411	4.74038	1.76326	4.57804
183500	9.15062	5.74598	0.766847	9.59093
183600	10.1571	3.75158	0	5.59736
183700	9.16364	3.75717	0	5.59742
183800	10.1702	5.76277	8.7776	2.59122
183900	8.17667	6.76837	0	9.57887
184000	9.18318	0	1.78477	4.56052
184100	8.18969	6.77958	2.78835	3.53632
184200	8.1962	5.78518	4.79194	6.50643
184300	9.20272	4.79079	2.79553	0.471048
184400	8.20923	2.79639	6.79912	7.43036
184500	8.21575	4.802	8.80271	7.38457
184600	7.22226	2.80761	0	3.33391
184700	8.22878	1.81322	6.80989	3.27862
184800	8.2353	4.81883	0	3.21893
184900	8.24182	2.82444	3.81707	9.15512
185000	6.24834	5.83006	2.82067	5.08745
185100	6.25486	4.83567	2.82426	5.0162
185200	5.26138	4.84129	1.82786	3.94166
185300	10.2679	4.8469	3.83145	8.86413
185400	9.27442	6.85252	0	0
185500	6.28094	4.85814	1.83865	4.70134
185600	7.28746	0	4.84225	3.61671
185700	8.29398	4.86938	1.84584	2.53037
185800	8.30051	4.875	3.84944	3.44263
185900	9.30703	3.88063	0.853046	3.35384
186000	7.31356	6.88625	4.85665	2.26435
186100	8.32008	5.89188	2.86025	0.174483
186200	9.32661	7.89751	7.86385	4.0846
186300	5.33314	0	1.86746	4.99503
186400	9.33966	5.90876	0	1.90614
186500	7.34619	1.91439	4.87467	0
186600	7.35272	8.92003	1.87827	0.731762
186700	4.35925	3.92566	1.88188	2.64696
186800	8.36578	2.93129	0.885488	1.5642
186900	6.37231	4.93693	0.889096	3.48383
187000	6.37884	5.94256	5.89271	0
187100	9.38538	0	5.89632	1.33157
187200	9.39191	7.95384	0	0
187300	8.39844	4.95948	2.90354	5.19275
187400	8.40498	4.96512	1.90715	5.12917
187500	7.41151	4.97076	2.91076	2.06987
187600	7.41805	2.97641	0	3.01514
187700	8.42458	4.98205	1.91799	0
187800	9.43112	8.9877	1.92161	4.92053
187900	8.43766	4.99334	0.925225	0.881164
188000	6.44419	3.99899	0.928842	0.847431
188100	12.4507	6.00464	4.93246	0
188200	6.45727	5.01029	4.93608	1.79778
188300	8.46381	0	6.9397	0
188400	11.4704	5.02159	0	4.7733
188500	8.47689	0.0272478	6.94694	0
188600	10.4834	5.0329	0	5.7755
188700	8.48998	5.03856	0.954184	1.78701
188800	8.49652	5.04422	0.957808	0
188900	8.50307	5.04987	1.96143	0
189000	3.50961	5.05553	2.96506	6.86476
189100	8.51616	9.06119	0.968683	4.90543
189200	7.5227	6.06686	0	2.9536
189300	8.52925	7.07252	5.97594	1.00934
189400	8.5358	5.07818	4.97956	2.07267
189500	5.54234	5.08385	1.98319	2.14363
189600	7.54889	4.08951	2.98682	2.2222
189700	8.55544	0.0951806	5.99045	1.30837
189800	8.56199	5.10085	0	8.40212
189900	10.5685	7.10652	1.99772	7.50339
190000	8.57509	6.11219	6.00135	2.61211
190100	8.58165	5.11786	0	6.72821
190200	8.5882	6.12353	3.00862	2.85158
190300	8.59475	6.12921	4.01225	3.9821
190400	8.60131	5.13488	2.01589	9.11965
190500	7.60786	5.14056	3.01952	8.26406
190600	8.61442	3.14624	2.02316	0
190700	6.62097	0	3.0268	1.57281
190800	6.62753	8.1576	0.0304387	5.73677
190900	7.63409	10.1633	2.03408	0.906842
191000	6.64064	2.16896	0	3.0828
191100	7.6472	4.17464	1.04136	2.26439
191200	12.6538	5.18033	3.045	3.45137
191300	5.66032	5.18602	1.04865	5.64348
191400	9.66688	13.1917	5.05229	1.84042
191500	11.6734	3.19739	0	5.04191
191600	8.68001	0	2.05958	5.24765
191700	10.6866	5.20877	2.06323	10.4573
191800	8.69313	5.21446	2.06687	5.67059
191900	6.6997	6.22015	3.07052	8.88713
192000	9.70626	6.22585	3.07417	6.10661
192100	13.7128	1.23154	4.07782	6.32867
192200	8.71939	4.23724	8.08147	8.55295
192300	11.726	6.24294	1.08512	6.77909
192400	7.73253	3.24863	3.08877	5.00672
192500	8.73909	6.25433	1.09242	0
192600	8.74566	8.26003	1.09608	11.465
192700	11.7522	8.26574	3.09973	8.69481
192800	7.7588	9.27144	2.10339	4.92462
192900	9.76537	1.27714	2.10704	8.15403
193000	8.77195	1.28285	0	8.38263
193100	8.77852	4.28856	2.11436	5.61004
193200	9.78509	4.29426	2.11801	8.83589
193300	5.79167	5.29997	2.12167	5.05977
193400	8.79824	5.30568	0	9.28131
193500	8.80482	5.31139	5.12899	11.5001
193600	8.81139	5.3171	4.13265	9.71584
193700	8.81797	4.32282	5.13632	8.9281
193800	11.8245	4.32853	0	12.1365
193900	7.83112	4.33425	1.14364	10.3407
194000	8.8377	5.33996	6.14731	12.5404
194100	8.84428	5.34568	4.15097	10.7352
194200	8.85086	5.3514	4.15464	10.9248
194300	9.85744	5.35712	0	14.1088
194400	9.86402	6.36284	2.16197	13.2869
194500	7.8706	1.36857	0	11.4589
194600	8.87719	3.37429	2.16931	8.62437
194700	11.8838	2.38001	3.17298	12.7831
194800	7.89036	2.38574	2.17665	7.93479
194900	11.8969	6.39147	0	11.0792
195000	7.90353	9.39719	6.184	9.21606
195100	9.91011	2.40292	1.18767	14.3452
195200	6.9167	5.40865	2.19134	12.4663
195300	4.92329	4.41439	2.19502	11.5792
195400	9.92988	5.42012	1.1987	12.6837
195500	8.93646	4.42585	2.20237	12.7797
195600	11.9431	6.43159	1.20605	9.86701
195700	5.94964	5.43732	7.20973	10.9455
195800	8.95624	6.44306	7.21341	15.0149
195900	12.9628	3.4488	3.21709	12.0753
196000	9.96942	3.45454	0	15.1265
196100	8.97601	9.46028	1.22445	13.1685
196200	10.9826	5.46602	2.22813	10.2011
196300	7.9892	9.47177	2.23181	12.2245
196400	9.9958	1.47751	0.235498	15.2384
196500	11.0024	1.48325	0	15.243
196600	8.00899	5.489	1.24287	10.2382
196700	12.0156	5.49475	2.24655	13.2241
196800	10.0222	8.5005	0	15.2008
196900	7.02879	0.506247	1.25393	13.1682
197000	8.03539	5.512	0	17.1264
197100	9.04199	2.51775	5.26131	13.0757
197200	9.04859	4.5235	4.265	13.016
197300	9.05519	4.52926	5.26869	16.9475
197400	9.06179	2.53501	0.272381	14.8703
197500	9.0684	1.54077	2.27607	8.78465
197600	9.075	3.54653	2.27977	14.6907
197700	12.0816	9.55229	2.28346	12.5886
197800	6.08821	5.55805	0	9.47856
197900	9.09482	4.56381	4.29085	12.3608
198000	11.1014	6.56957	2.29455	14.2356
198100	9.10803	1.57534	5.29825	11.1032
198200	9.11464	3.5811	7.30195	13.9638
198300	11.1213	5.58687	0	9.81766
198400	6.12786	9.59263	1.30935	8.66511
198500	7.13447	5.5984	2.31305	7.50642
198600	8.14108	4.60417	5.31675	11.3419
198700	12.1477	5.60994	7.32045	14.1718
198800	11.1543	5.61571	2.32415	11.9966
198900	9.16092	5.62149	5.32786	10.8164
199000	11.1675	4.62726	0	4.63165
199100	9.17415	0	3.33527	11.4427
199200	6.18077	7.63881	2.33898	10.2499
199300	7.18738	3.64459	0	15.0535
199400	11.194	5.65037	2.34639	10.854
199500	9.20062	5.65615	0	9.6516
199600	9.20724	4.66193	2.35381	12.4468
199700	10.2139	5.66771	3.35752	13.2399
199800	8.22048	5.67349	1.36123	10.0312
199900	10.2271	5.67928	0	7.82114
[truncated: 13,000 more rows]
