# Supplementary material
Source: ML conference proceedings conference paper supplement (https://openreview.net/forum?id=4BsrGHtvW5)
Supplement: supplementary_material [file minigrid.xlsx]

## Sheet: Sheet1
0	105.923	107.754	86.6879	61.2151
100	95.0011	114.907	65.7585	58.5773
200	92.8639	104.367	51.378	77.8605
300	111.646	107.004	68.9253	49.0155
400	81.304	116.111	48.3601	49.0009
500	83.2508	101.093	89.85	40.9685
600	83.3984	78.6911	45.9573	95.2488
700	90.0808	74.2132	102.478	92.3926
800	88.0235	95.9358	89.7421	42.3556
900	87.9808	85.465	90.5581	66.2668
1000	90.9944	73.9475	99.9504	106.371
1100	95.6787	68.425	88.4094	99.335
1200	93.9867	72.744	88.2655	99.0412
1300	94.0719	66.6419	111.448	72.0919
1400	91.5676	69.8955	93.4889	75.7961
1500	98.0873	66.5587	93.3948	63.2096
1600	111.284	92.0331	99.5695	83.8623
1700	114.839	96.8859	114.134	102.288
1800	108.989	96.7123	115.122	104.224
1900	103.113	79.5286	114.877	64.4747
2000	118.068	102.627	114.109	112.806
2100	82.9489	108.555	97.5674	72.1322
2200	100.07	108.371	113.668	64.3375
2300	82.4566	105.523	55.9406	103.052
2400	102.045	115.792	62.8992	64.6556
2500	81.304	116.111	48.3601	49.0009
2600	78.1937	107.378	47.0927	83.6172
2700	70.2969	84.3697	47.2117	59.601
2800	70.5237	70.1525	47.9331	79.2725
2900	76.4807	108.033	47.1511	84.732
3000	65.8365	60.7633	46.7159	91.1134
3100	83.5815	72.5056	69.6946	47.148
3200	94.9457	107.234	69.4257	61.9758
3300	101.106	110.855	71.2648	88.2412
3400	92.4761	72.1668	70.2201	69.6385
3500	103.615	116.054	90.3877	46.5376
3600	89.2784	55.7074	79.1517	64.8438
3700	83.8185	111.802	75.292	52.2884
3800	86.1211	49.6332	86.1485	66.3631
3900	66.0173	98.3818	88.7265	60.6856
4000	61.6666	44.8337	69.1795	72.0042
4100	62.9846	59.0572	83.75	77.1479
4200	73.4951	57.8604	100.315	77.7963
4300	69.637	89.85	71.0251	75.4047
4400	71.0205	45.9573	94.0026	76.4402
4500	75.1177	102.478	104.782	81.5901
4600	62.3462	89.7421	55.6671	78.5137
4700	68.659	90.5581	100.896	80.1863
4800	66.1293	99.9504	67.8373	75.2083
4900	62.2525	88.4094	87.0373	76.3887
5000	46.2765	88.2655	45.3525	74.3556
5100	43.4961	111.448	49.2068	52.3522
5200	43.7981	93.4889	55.2507	57.7122
5300	45.8494	93.3948	67.9266	60.131
5400	45.0034	99.5695	67.7976	56.3384
5500	42.0281	114.107	73.9251	46.8347
5600	112.238	104.572	81.5788	85.4651
5700	98.3517	110.049	78.4065	82.4229
5800	55.7296	107.568	76.5899	53.8959
5900	54.6324	79.7247	79.7362	78.2134
6000	117.012	68.0023	83.6515	114.29
6100	107.014	69.7497	38.8732	108.502
6200	113.379	78.7409	74.3119	99.5981
6300	110.336	109.629	69.1975	90.4821
6400	116.221	78.6606	40.0578	107.322
6500	106.878	111.633	58.4646	85.0653
6600	99.066	105.584	88.6012	85.802
6700	104.543	104.67	119.062	87.0227
6800	103.966	101.566	41.2933	88.6714
6900	106.66	108.166	83.4095	88.8854
7000	95.6779	100.422	129.885	89.4382
7100	78.9979	67.6046	116.436	15.8226
7200	88.5087	71.1611	120.671	30.3861
7300	74.7718	83.1659	127.372	62.8966
7400	75.4738	70.8762	114.091	47.5735
7500	72.7162	62.791	113.821	60.9526
7600	62.8564	96.9129	109.553	53.9398
7700	57.0033	106.49	76.1423	64.7272
7800	64.2306	84.4139	61.6558	28.7379
7900	57.4405	73.7064	95.4115	81.1083
8000	53.8635	116.43	56.4287	85.0471
8100	53.2758	95.5296	56.597	133.476
8200	52.5465	106.371	137.544	101.724
8300	53.3741	83.5961	80.6413	124.106
8400	53.7139	72.1449	99.5304	98.5029
8500	52.515	68.8625	137.942	139.203
8600	54.2374	60.9402	89.9274	123.445
8700	53.3759	64.0387	118.071	119.22
8800	52.9257	66.1264	86.8603	117.407
8900	53.3827	67.956	65.3136	106.264
9000	60.0194	59.2841	58.4242	102.871
9100	82.6531	59.8498	91.8318	91.4901
9200	69.3092	59.6572	54.8788	102.117
9300	71.5804	60.4319	37.591	99.9263
9400	69.9083	59.9001	89.85	89.4319
9500	83.9381	60.5197	45.9573	85.6571
9600	87.5977	66.3976	102.478	78.778
9700	96.3215	63.5011	89.7421	62.1563
9800	96.7703	69.4597	90.5581	50.6864
9900	93.9353	70.1341	99.9504	70.7382
10000	97.1677	73.2773	88.4094	25.8489
10100	95.1894	67.1288	88.2655	26.7126
10200	92.8829	70.3399	111.448	60.5079
10300	96.0515	68.014	93.4889	31.9745
10400	94.1833	68.7631	93.3948	33.8025
10500	92.8158	61.202	99.5695	102.629
10600	92.1642	73.3448	99.1861	94.9808
10700	88.9635	68.1259	91.6414	71.8754
10800	88.967	64.0797	95.1546	59.9963
10900	90.2128	64.5099	115.678	97.7699
11000	62.3947	81.7274	117.76	41.1796
11100	84.8565	73.1843	110.981	74.7564
11200	74.4405	70.9633	85.1744	76.0588
11300	91.6984	68.8017	105.335	45.2781
11400	77.7157	55.0002	104.093	56.6258
11500	116.389	53.4814	80.6657	87.877
11600	102.08	54.2868	116.456	105.193
11700	100.748	55.3544	135.019	89.1573
11800	112.006	56.1622	142.127	103.425
11900	99.9274	55.8167	112.468	108.366
12000	99.0318	58.1527	143.58	111.424
12100	96.5966	56.6731	143.045	56.6593
12200	94.4768	57.3533	53.6924	65.5176
12300	96.2839	56.7276	60.1862	108.806
12400	97.9273	57.1602	97.3652	78.9615
12500	84.3483	56.2653	32.3254	43.5579
12600	85.5914	59.8877	40.4228	100.395
12700	84.5132	75.4098	33.6027	80.4353
12800	85.3528	116.401	33.8528	113.363
12900	88.8415	70.0822	39.8264	86.4339
13000	88.9377	118.968	43.0372	132.071
13100	81.3777	106.172	45.8882	111.376
13200	84.3142	111.935	49.143	38.8046
13300	87.1859	112.339	49.2382	64.4479
13400	74.2428	112.402	48.2193	84.5381
13500	73.568	100.658	50.1072	17.2039
13600	69.5309	89.6099	62.0911	36.2706
13700	61.1497	96.1918	67.0047	47.788
13800	72.6468	96.8965	95.7449	30.3203
13900	70.5646	99.501	89.1033	39.1223
14000	59.8185	80.3404	108.646	51.1269
14100	62.2508	87.438	113.596	61.3633
14200	68.4545	82.8441	111.011	71.7764
14300	61.3884	80.35	111.438	56.1852
14400	63.767	85.533	108.815	72.2461
14500	68.4778	87.5519	113.725	75.2416
14600	91.9358	75.8572	128.658	74.4553
14700	69.2125	80.0469	133.807	75.2365
14800	99.8738	87.2688	129.282	74.1783
14900	99.7839	81.0751	123.938	75.2287
15000	100.628	74.1295	145.914	73.8648
15100	62.1941	58.1476	82.371	103.279
15200	45.4492	73.7265	98.9606	124.338
15300	50.1211	64.268	132.937	83.2675
15400	42.5355	59.1268	132.321	84.8241
15500	41.1515	40.9323	56.9064	130.705
15600	48.4233	102.718	100.682	113.531
15700	44.7878	78.4571	84.3624	125.019
15800	44.4256	85.9145	89.3576	99.06
15900	42.9863	61.5058	59.5169	87.4246
16000	49.2858	109.747	102.392	79.0992
16100	48.5058	105.64	77.1728	73.575
16200	46.6277	99.744	81.5735	79.0438
16300	46.7649	108.519	69.2159	63.0229
16400	47.4942	91.3847	78.0901	50.4926
16500	43.6802	88.8903	65.1184	47.3271
16600	43.2967	93.0988	72.2052	72.0073
16700	43.5556	116.146	66.4217	115.463
16800	43.3591	112.045	72.4491	51.2732
16900	43.436	112.592	76.3975	115.349
17000	43.2583	119.894	78.5381	116.914
17100	69.5061	91.8444	80.8383	84.9871
17200	54.4067	97.0012	78.7307	52.2188
17300	97.1685	82.8242	80.2427	94.7898
17400	96.7502	92.9054	81.3799	77.7058
17500	108.437	80.438	82.8415	39.9529
17600	109.11	100.332	88.0641	73.1306
17700	118.544	119.427	94.2848	68.0195
17800	117.947	83.0543	84.4908	107.55
17900	117.024	92.7997	87.1203	46.8797
18000	120.182	149.014	95.8398	112.913
18100	130.192	160.424	60.7487	116.347
18200	136.366	161.167	91.4094	120.748
18300	126.447	160.721	52.2803	127.109
18400	132.524	152.407	69.4037	114.271
18500	137.623	162.43	42.4679	134.165
18600	128.057	169.78	48.0983	33.7291
18700	125.942	185.73	48.4142	35.05
18800	127.364	181.667	50.9947	131.534
18900	126.848	164.254	46.6599	34.0186
19000	119.469	186.036	72.9078	31.6214
19100	133.74	186.913	66.8179	28.2284
19200	141.646	193.873	71.1584	26.036
19300	127.214	189.77	69.5311	27.8966
19400	129.273	186.951	70.7657	17.9641
19500	145.213	194.292	66.6924	13.4368
19600	113.522	184.91	101.369	18.9658
19700	117.933	191.409	83.8842	61.308
19800	128.476	189.569	106.122	31.9339
19900	122.579	191.251	93.3095	29.5879
20000	81.304	181.49	107.256	64.4573
20100	80.2572	194.144	85.7294	73.5915
20200	71.0227	197.878	101.332	69.0867
20300	67.3071	206.725	84.034	77.3645
20400	68.8197	204.99	93.1198	66.8289
20500	65.8365	207.441	83.0302	82.3915
20600	92.6294	207.127	79.0587	92.8396
20700	74.8934	186.383	73.7364	103.652
20800	95.6449	201.307	72.5456	83.8289
20900	86.1243	192.119	81.3642	101.887
21000	103.615	184.993	70.4073	121.103
21100	72.7169	203.091	89.3479	35.643
21200	68.1724	204.13	92.9393	45.1369
21300	83.9346	208.971	88.0243	61.6755
21400	94.3144	186.402	88.0609	80.0779
21500	61.6666	209.129	101.71	21.1567
21600	71.5614	206.984	99.6423	70.1166
21700	63.8417	208.37	97.2559	64.3561
21800	67.4382	206.876	97.7763	31.1443
21900	63.1139	206.474	94.6461	73.57
22000	75.1177	205.729	90.2629	98.8511
22100	48.6991	205.529	84.4069	58.3787
22200	64.1364	204.857	90.0799	46.1349
22300	67.7454	204.087	86.942	57.4857
22400	68.6826	205.413	84.2608	71.5513
22500	46.2765	203.766	70.6679	41.6256
22600	45.7407	204.16	60.2698	43.8146
22700	42.044	247.416	65.8357	45.9527
22800	42.4958	227.971	63.854	71.9567
22900	43.2408	210.367	57.6829	65.5727
23000	42.0281	270.816	56.4555	75.6967
23100	99.0852	254.805	56.0128	69.8772
23200	83.001	268.563	55.7822	75.6152
23300	51.2107	225.086	55.6206	69.8222
23400	97.1527	260.537	56.2592	71.7666
23500	117.012	197.498	55.5117	65.29
23600	107.587	210.907	52.661	96.8332
23700	113.998	235.724	52.7377	80.1473
23800	109.948	199.832	50.841	99.4272
23900	115.714	226.08	54.998	99.0758
24000	106.878	241.082	50.6152	104.88
24100	105.726	246.531	112.233	94.7362
24200	105.364	244.415	125.205	65.9784
24300	96.589	243.218	56.5281	50.6695
24400	98.3214	241.559	129.687	54.773
24500	95.6779	248.96	131.474	35.4325
24600	149.94	234.772	97.4556	39.0178
24700	122.792	239.957	104.671	39.4205
24800	180.475	239.027	84.8071	35.6114
24900	115.936	241.785	64.6871	37.851
25000	182.78	227.62	58.0465	40.6779
25100	184.766	231.731	88.6227	49.0608
25200	184.864	233.555	79.6361	72.592
25300	184.828	232.241	66.2042	69.0979
25400	183.577	228.186	60.3673	98.9811
25500	184.884	233.682	95.072	112.556
25600	184.725	233.687	100.302	79.773
25700	168.848	238.681	96.4122	75.837
25800	170.888	234.321	96.6865	79.4872
25900	169.366	234.397	98.9222	63.3092
26000	168.049	239.669	112.679	59.9355
26100	179.202	241.011	80.6924	60.0558
26200	177.593	240.243	84.6538	60.9396
26300	173.709	243.333	110.703	60.0501
26400	179.639	246.464	106.193	60.573
26500	182.063	249.303	61.523	61.1481
26600	173.988	201.384	80.5409	61.4456
26700	155.455	195.479	80.041	61.2615
26800	173.376	232.646	66.1786	62.7514
26900	157.042	244.254	66.4989	63.1317
27000	154.503	187.674	89.7361	63.6542
27100	174.243	210.52	95.4569	71.4352
27200	172.778	223.864	95.5395	69.0174
27300	204.994	198.099	95.4764	74.04
27400	161.059	206.405	94.0237	65.1054
27500	216.069	224.209	95.7902	82.3024
27600	194.642	232.578	108.226	94.4401
27700	202.19	230.449	102.307	103.488
27800	199.615	234.153	110.464	91.5136
27900	197.58	231.759	99.7913	90.4236
28000	188.534	235.478	113.528	104.422
28100	207.131	218.31	113.298	101.042
28200	203.459	230.837	99.9635	103.647
28300	190.933	218.452	65.6487	99.8661
28400	207.874	231.759	101.948	103.929
28500	208.886	215.946	63.0512	96.3893
28600	209.31	207.428	65.3029	88.8532
28700	209.549	203.314	71.8133	79.5853
28800	209.221	209.684	66.7376	63.3086
28900	208.928	212.114	88.9131	63.095
29000	209.695	195.966	89.4244	50.4194
29100	217.661	226.667	90.7317	69.9913
29200	212.759	249.717	93.7738	64.7788
29300	221.323	215.681	96.8808	77.9646
29400	224.135	224.057	93.5277	70.2084
29500	224.515	273.717	100.104	104.413
29600	205.859	204.443	93.698	75.943
29700	206.347	232.062	77.7821	84.3713
29800	202.49	268.281	81.7583	79.6358
29900	213.941	260.094	68.8952	76.5635
30000	201.305	202.361	66.861	63.043
30100	205.165	207.684	83.1818	82.5052
30200	208.042	215.682	74.1028	64.9716
30300	212.203	210.42	98.4521	93.6001
30400	209.953	227.275	72.2341	86.552
30500	214.521	230.608	101.474	93.7873
30600	217.851	230.77	43.831	89.1211
30700	223.48	231.088	63.217	85.5126
30800	218.98	231.363	82.3107	76.2532
30900	222.771	231.134	62.5816	91.5559
31000	223.509	231.422	41.9213	73.6948
31100	226.759	232.636	46.6497	81.8615
31200	225.196	231.84	45.0951	79.6633
31300	227.162	233.472	50.3811	107.226
31400	228.149	231.721	48.824	78.5849
31500	231.869	233.602	52.0961	108.559
31600	235.345	238.978	55.1303	103.843
31700	238.977	235.883	52.7066	97.5241
31800	235.155	236.556	55.7497	107.918
31900	233.665	237.665	55.3549	101.374
32000	239.754	239.902	56.6848	89.6602
32100	237.871	222.105	77.7354	84.7207
32200	230.143	221.052	63.5175	76.0561
32300	222.72	225.001	99.7694	74.7442
32400	225.411	232.321	85.0315	72.2347
32500	218.937	211.801	108.517	71.8425
32600	219.364	227.159	73.1801	81.6029
32700	219.461	255.621	95.6102	77.0902
32800	219.664	269.078	72.7465	76.3423
32900	219.36	233.162	56.6863	72.7822
33000	219.793	272.9	56.3593	85.078
33100	243.907	265.39	64.2492	84.8747
33200	235.997	271.977	64.2739	81.6206
33300	225.33	267.671	57.798	84.2025
33400	234.314	264.603	62.0973	84.3219
33500	253.816	264.119	68.0559	81.1986
33600	233.504	268.421	101.424	107.194
33700	240.521	270.146	89.2597	77.3434
33800	249.825	269.836	74.5215	76.2363
33900	214.589	269.149	72.5534	76.8157
34000	206.517	271.175	107.462	71.2759
34100	239.322	264.724	105.421	65.0132
34200	228.001	269.407	107.08	70.8803
34300	212.15	266.847	104.818	129.401
34400	221.503	266.8	105.867	65.8658
34500	264.282	263.238	103.135	57.7352
34600	255.846	279.892	94.185	61.1864
34700	255.943	269.622	93.5952	64.2587
34800	255.656	283.659	93.5445	58.051
34900	262.973	266.949	97.704	72.4368
35000	239.855	284.857	91.7794	80.3617
35100	247.213	288.682	52.2966	102.398
35200	242.708	288.372	87.1462	84.481
35300	245.16	287.649	85.3626	98.4566
35400	240.459	290.271	45.9804	89.6896
35500	247.98	290.297	42.7847	108.755
35600	244.9	287.042	49.677	103.119
35700	246.226	286.274	47.4741	101.56
35800	242.953	289.241	52.9227	107.299
35900	246.25	289.541	47.8355	104.713
36000	241.472	283.816	53.0157	99.0498
36100	244.843	295.561	78.8841	70.4456
36200	251.329	287.804	82.9216	91.7784
36300	253.447	289.581	67.8639	86.8804
36400	242.978	293.509	64.777	89.3594
36500	254.643	296.357	85.2213	68.8558
36600	274.733	297.169	104.688	50.5081
36700	272.074	302.667	97.3176	60.8551
36800	266.382	297.126	99.4303	45.8985
36900	277.161	298.79	93.7067	50.0658
37000	278.091	304.703	105.88	44.8602
37100	275.347	306.859	107.902	68.2686
37200	275.817	305.507	110.163	59.8389
37300	277.706	306.756	106.47	73.9403
37400	275.303	307.502	112.369	69.4998
37500	274.246	307.661	113.619	97.5215
37600	274.016	304.203	112.555	99.7331
37700	273.815	306.793	95.2435	101.831
37800	274.129	289.297	101.756	100.812
37900	274.121	297.368	87.5476	102.827
38000	273.732	282.359	86.576	108.334
38100	273.184	289.437	74.3729	107.659
38200	272.036	289.585	78.3376	78.3265
38300	271.456	284.834	69.3489	99.4832
38400	272.325	286.073	67.8235	101.126
38500	271.333	299.277	66.4702	76.2519
38600	261.315	299.864	84.4025	69.2956
38700	253.002	302.24	93.6841	68.6003
38800	258.835	299.355	88.7126	57.0644
38900	264.571	305.829	70.8732	67.0306
39000	251.974	309.989	119.211	42.8193
39100	262.943	308.203	118.236	96.9936
39200	253.898	309.197	65.9008	91.863
39300	255.859	309.655	117.248	50.4122
39400	258.781	309.282	69.4998	85.7001
39500	264.655	308.188	44.1164	101.755
39600	250.022	308.988	74.4404	51.0063
39700	230.992	310.843	64.2591	96.1565
39800	260.433	315.377	98.2304	90.6111
39900	244.719	317.465	92.9625	58.2761
40000	176.08	337.852	114.419	48.381
40100	209.644	336.975	113.279	48.5117
40200	210.498	336.191	92.704	66.0692
40300	240.091	329.449	83.7171	86.762
40400	233.721	328.489	96.5965	68.079
40500	242.67	327.646	79.8317	107.211
40600	274.039	321.745	84.0373	108.016
40700	308.044	322.811	97.3083	107.393
40800	301.145	324.173	103.622	108.503
40900	244.572	323.771	91.2155	107.226
41000	330.829	321.621	118.738	108.797
41100	330.54	331.431	116.294	108.534
41200	330.744	332.261	117.361	103.109
41300	330.807	331.25	108.034	108.185
41400	330.559	325.174	118.325	106.14
41500	330.523	334.994	107.551	103.09
41600	319.517	331.382	107.421	117.008
41700	307.834	328.578	107.4	117.954
41800	307.75	319.661	107.045	106.313
41900	312.083	325.664	106.94	112.763
42000	301.316	313.138	106.778	118.32
42100	301.008	328.881	113.526	107.75
42200	298.573	327.552	110.573	106.17
42300	298.312	342.907	116.305	111.461
42400	301.09	332.474	115.976	115.573
42500	297.497	348.127	117.388	104.44
42600	319.676	304.537	92.1354	96.4121
42700	312.475	315.448	116.62	70.3733
42800	312.903	303.927	103.076	77.8307
42900	327.45	326.726	109.148	94.2924
43000	337.18	297.637	91.3619	51.8425
43100	325.935	326.67	110.735	49.821
43200	320.93	306.656	94.0988	48.6526
43300	329.031	395.315	98.029	47.0614
43400	331.361	346.167	105.688	47.5445
43500	313.201	399.067	110.853	45.019
43600	305.62	387.72	95.887	78.9005
43700	310.011	392.222	92.7765	73.5159
43800	305.797	386.665	85.8626	61.8996
43900	311.691	390.261	110.66	56.7803
44000	303.855	329.807	85.3704	99.8148
44100	339.293	358.452	79.5202	49.4291
44200	312.69	345.939	75.1926	47.239
44300	342.409	359.877	72.6055	81.4439
44400	333.93	360.556	75.662	77.554
44500	343.621	361.891	70.8155	42.7072
44600	341.751	348.379	47.2562	44.1933
44700	342.499	349.464	66.5614	43.4163
44800	334.496	352.911	44.6739	46.7761
44900	336.49	359.933	64.8322	43.0193
45000	334.442	342.8	43.0142	47.4557
45100	338.574	346.272	104.862	51.7356
45200	345.69	365.134	55.6541	49.6603
45300	340.473	346.839	57.5937	81.6123
45400	337.888	363.516	101.357	47.6236
45500	349.124	386.092	110.196	60.4181
45600	338.441	380.833	111.561	62.6537
45700	338.644	384.462	112.12	64.3525
45800	339.446	376.35	112.064	67.1054
45900	344.042	383.513	112.447	65.9937
46000	334.863	365.039	113.074	69.7412
46100	336.899	364.307	69.6393	61.9026
46200	343.146	362.953	112.686	50.3484
46300	343.962	364.68	80.8079	43.2724
46400	345.879	363.496	111.843	54.5881
46500	346.572	362.83	67.1199	42.0572
46600	339.528	379.729	65.6589	61.1885
46700	343.206	364.226	59.3705	62.6411
46800	342.984	370.131	60.3498	75.9084
46900	339.777	366.086	65.5487	86.0065
47000	339.145	392.328	58.7797	89.4559
47100	403.184	405.704	59.4543	83.34
47200	364.702	406.294	68.6932	53.3136
47300	390.991	416.67	69.901	74.7229
47400	395.99	409.107	62.3009	57.9336
47500	411.641	418.797	70.2343	43.4715
47600	406.698	416.568	78.3839	43.5878
47700	408.904	373.301	72.4352	54.3083
47800	411.359	405.697	72.719	55.2641
47900	398.288	380.995	76.1331	48.926
48000	397.146	347.028	78.6499	68.7859
48100	395.192	360.854	77.8708	73.0919
48200	387.88	363.949	72.2493	74.1933
48300	393.976	374.356	62.3588	69.0407
48400	392.505	365.91	70.2316	85.9484
48500	386.845	402.599	61.8445	90.6614
48600	366.335	405.74	78.3285	104.884
48700	366.94	405.058	67.3683	105.995
48800	366.679	422.917	77.9796	99.0987
48900	379.726	431.516	84.2714	98.3349
49000	362.318	445.045	84.9034	110.95
49100	359.373	418.446	111.352	107.735
49200	359.383	401.53	105.081	105.486
49300	355.908	422.465	90.1757	105.227
49400	357.434	387.18	107.609	110.489
49500	353.336	367.821	114.059	104.894
49600	386.404	371.571	102.009	97.5927
49700	384.255	376.954	96.1495	69.2451
49800	357.947	377.332	111.938	68.3329
49900	391.131	388.7	109.614	73.4988
50000	394.699	389.718	96.0672	55.4476
50100	417.999	422.075	86.7697	65.8926
50200	411.582	439.992	82.3788	95.4255
50300	405.686	392.958	77.9803	95.8736
50400	417.471	403.695	60.3743	90.5756
50500	438.825	445.143	57.0342	101.87
50600	427.437	416.845	63.3784	105.395
50700	436.674	395.031	64.2514	106.909
50800	435.294	435.011	71.8359	104.032
50900	435.97	412.984	60.5469	103.536
51000	422.826	393.424	73.1205	111.444
51100	428.091	406.728	68.0778	100.604
51200	426.352	424.048	67.3551	75.6742
51300	427.049	422.878	66.2363	91.295
51400	425.15	411.055	59.8659	86.3049
51500	431.208	434.495	54.6764	70.1206
51600	435.507	425.896	52.1419	69.5828
51700	431.428	432.315	48.1528	69.2432
51800	431.438	434.343	52.4475	63.7012
51900	431.624	429.545	51.7749	63.2714
52000	435.511	425.212	43.8963	63.2084
52100	436.836	432.046	43.0904	71.8449
52200	437.276	430.044	41.399	70.1407
52300	435.777	433.209	41.7462	67.7018
52400	437.345	426.41	40.0961	67.7494
52500	437.378	434.36	39.9035	100.022
52600	436.843	427.103	42.8144	99.3376
52700	435.652	425.617	49.7738	90.4976
52800	436.949	431.971	46.2293	89.8204
52900	434.445	425.067	50.2966	98.308
53000	433.98	423.899	61.1367	87.6218
53100	436.275	440.709	65.7295	81.0654
53200	434.394	436.734	65.9174	81.4674
53300	433.99	443.485	65.648	81.6728
53400	436.821	432.564	63.9305	50.8769
53500	437.256	454.319	68.0204	44.5611
53600	435.885	450.406	66.5474	52.8706
53700	437.175	453.395	62.9252	49.5262
53800	435.944	449.891	62.988	44.8695
53900	436.656	449.654	65.6154	44.8225
54000	435.623	449.277	61.3854	59.2013
54100	444.89	450.79	63.9127	52.0921
54200	441.036	450.229	62.8716	55.9201
54300	442.484	450.18	61.4666	48.0524
54400	439.465	450.657	65.1978	56.5791
54500	446.84	452.42	70.6899	47.9805
54600	450.744	445.347	63.7534	59.9164
54700	454.532	442.588	67.3519	73.27
54800	467.988	428.431	63.8633	50.2086
54900	475.472	441.042	66.9893	72.453
55000	481.77	424.817	62.7827	76.4669
55100	478.174	425.256	115.525	78.5528
55200	471.551	451.585	81.0307	81.0462
55300	474.965	430.338	112.075	81.6148
55400	467.301	424.82	91.5577	77.992
55500	457.402	460.199	126.383	83.0606
55600	446.393	480.872	126.321	87.6262
55700	444.694	484.576	125.664	87.7692
55800	454.963	474.846	125.808	83.9279
55900	452.732	474.509	124.662	83.0947
56000	437.243	486.368	124.522	91.7438
56100	452.537	474.192	124.073	76.3883
56200	453.448	475.433	117.003	82.4322
56300	465.496	486.263	109.773	74.9089
56400	463.567	475.938	105.097	80.0741
56500	473.039	473.275	68.3603	70.0763
56600	453.472	459.7	86.2221	70.8318
56700	453.614	471.507	96.2141	71.3136
56800	416.186	471.632	85.3145	70.9209
56900	437.114	468.618	141.493	70.8951
57000	409.5	443.877	154.705	72.3605
57100	410.17	455.318	88.9817	74.8061
57200	412.814	460.76	50.9526	75.9045
57300	412.667	449.99	110.364	78.4727
57400	410.581	459.069	128.475	73.9672
57500	413.205	469.462	47.1291	92.9666
57600	407.354	469.968	74.0311	91.7287
57700	407.324	473.25	98.9549	91.9779
57800	410.764	475.563	53.8048	90.4297
57900	407.568	478.984	48.43	90.2278
58000	405.899	479.631	101.118	89.3793
58100	402.872	492.654	145.233	94.6368
58200	405.847	502.21	155.011	96.6064
58300	403.459	481.825	148.737	92.6671
58400	404.407	503.078	117.986	97.1733
58500	402.822	511.918	160.873	105.996
58600	417.644	509.968	173.446	93.6326
58700	415.197	509.527	166.039	87.6936
58800	410.701	505.064	170.377	80.5093
58900	410.551	507.579	163.617	70.973
59000	418.371	503.117	175.48	66.5978
59100	420.754	500.353	156.173	61.3907
59200	419.124	500.778	164.888	49.8706
59300	419.46	499.346	159.041	57.046
59400	421.447	498.797	153.5	60.1334
59500	422.826	496.366	145.575	41.7413
59600	423.195	456.947	128.726	111.274
59700	424.668	485.421	137.036	119.614
59800	426.56	468.833	134.446	64.7866
59900	428.693	458.466	127.3	50.7534
60000	431.208	447.712	126.258	121.316
60100	432.527	451.292	140.791	119.746
60200	432.08	450.325	156.228	114.58
60300	433.219	451.348	139.017	118.456
60400	434.273	452.296	128.696	115.31
60500	435.511	454.336	164.447	99.84
60600	445.195	455.027	143.838	54.7928
60700	439.429	470.614	150.972	53.5822
60800	446.659	468.686	144.746	71.6841
60900	454.225	465.58	144.535	67.4311
61000	457.378	471.584	140.414	52.8873
61100	451.03	465.598	131.599	41.904
61200	454.788	470.431	121.518	48.8586
61300	452.786	467.266	122.353	28.0383
61400	444.475	466.679	136.862	37.3296
61500	442.98	465.425	116.643	23.4997
61600	441.121	480.718	124.092	62.7954
61700	441.513	485.629	126.83	49.5788
61800	440.882	488.232	117.613	23.8146
61900	440.062	489.343	119.213	64.5469
62000	437.256	495.199	137.135	77.3136
62100	431.785	495.354	143.98	100.804
62200	436.014	495.269	150.332	96.1046
62300	436.366	495.358	150.076	82.7276
62400	424.53	495.452	154.711	90.044
62500	421.623	495.781	160.372	112.919
62600	443.1	492.591	188.505	98.5632
62700	423.712	480.517	201.726	95.7913
62800	437.587	484.417	181.498	106.724
62900	429.585	491.003	194.255	96.4945
63000	446.84	476.115	204.055	95.5142
63100	469.929	500.997	132.5	94.4363
63200	467.696	486.848	106.052	90.7366
63300	480.367	487.872	89.7538	92.4318
63400	450.314	488.558	154.813	90.6486
63500	481.77	501.447	87.9788	90.1815
63600	470.268	512.935	157.253	94.3646
63700	465.47	522.424	138.528	103.858
63800	477.234	521.034	134.611	118.67
63900	462.808	514.215	136.559	98.0604
64000	457.402	530.939	175.803	132.341
64100	479.775	534.889	168.354	134.657
64200	461.346	532.471	167.614	135.239
64300	478.634	533.163	170.768	137.018
64400	478.659	534.675	173.726	135.232
64500	496.075	536.01	165.113	138.344
64600	465.907	530.579	199.717	139.442
64700	457.027	532.431	167.694	139.484
64800	469.225	531.147	199.029	138.6
64900	465.043	531.484	200.713	139.214
65000	455.565	530.406	200.881	139.942
65100	455.938	520.228	149.808	120.104
65200	456.877	514.584	172.146	131.68
65300	456.47	524.028	140.555	134.684
65400	457.287	516.641	154.479	129.138
65500	461.112	513.672	133.312	115.737
65600	473.044	516.733	154.194	114.161
65700	472.231	529.118	157.398	113.98
65800	467.35	519.702	158.491	114.818
65900	462.457	514.09	147.216	115.17
66000	474.326	530.84	164.403	113.88
66100	486.306	526.764	142.585	129.172
66200	476.753	525.722	144.927	135.687
66300	502.64	523.625	149.607	120.259
66400	497.313	522.457	161.086	131.856
66500	505.228	519.025	136.728	150.145
66600	493.432	521.927	143.323	116.11
66700	498.067	529.787	146.054	138.715
66800	496.464	530.331	144.769	128.847
66900	486.761	521.052	138.418	117.077
67000	478.478	532.801	146.125	107.832
67100	493.684	522.533	146.199	112.345
67200	488.394	524.493	147.196	130.729
67300	491.093	530.979	146.984	112.131
67400	504.758	530.014	146.949	135.02
67500	514.058	522.388	147.252	140.417
67600	512.326	520.634	147.333	118.732
67700	511.864	522.306	158.092	117.736
67800	511.274	522.06	149.746	115.159
67900	512.349	520.193	163.399	136.566
68000	510.915	516.995	163.839	114.822
68100	499.439	517.333	165.727	115.242
68200	507.917	522.048	165.996	116.263
68300	500.53	517.205	169.858	115.071
68400	510.545	517.97	175.78	116.384
68500	496.278	523.19	180.012	116.96
68600	495.777	523.251	181.624	124.819
68700	494.841	523.338	180.338	122.911
68800	494.253	523.225	189.257	136.019
68900	494.583	523.38	191.34	153.447
69000	493.967	523.383	194.435	153.826
69100	494.584	528.516	178.029	101.444
69200	503.712	531.987	187.997	127.838
69300	496.647	526.272	192.712	88.484
69400	496.717	524.699	180.84	116.308
69500	512.402	534.482	173.637	83.3418
69600	488.99	538.05	177.508	128.611
69700	487.527	536.272	182.817	169.991
69800	499.128	537.034	181.567	139.831
69900	511.159	535.896	175.69	107.797
70000	485.182	541.73	183.239	198.92
70100	495.108	508.739	186.048	89.9007
70200	492.024	510.465	186.99	124.72
70300	486.727	512.562	191.556	144.98
70400	485.438	514.951	195.535	108.96
70500	500.11	508.484	201.467	78.9066
70600	527.973	511.74	200.106	100.813
70700	523.595	534.302	193.205	173.838
70800	501.396	520.313	191.485	131.216
70900	507.568	534.872	192.875	95.5376
71000	530.141	539.04	189.94	203.131
71100	527.567	517.139	187.959	194.139
71200	527.536	521.936	179.218	171.299
71300	528.441	526.096	183.539	180.184
71400	529.95	536.145	187.73	181.967
71500	524.631	514.814	178.347	165.593
71600	513.467	528.129	178.464	162.082
71700	523.586	525.176	178.517	128.467
71800	513.296	521.599	178.482	128.977
71900	517.643	520.804	178.452	140.734
72000	508.617	529.574	178.63	108.008
72100	510.089	530.336	177.819	67.8851
72200	508.714	530.955	178.569	45.6253
72300	510.695	530.319	177.886	96.3555
72400	509.87	529.937	178.044	68.4908
72500	513.646	531.277	175.856	34.2233
72600	508.841	522.085	176.791	178.89
72700	503.478	516.961	182.282	171.627
72800	500.808	522.763	175.983	171.714
72900	503.625	508.058	181.267	155.429
73000	496.476	505.753	183.91	192.823
73100	512.918	513.352	186.284	183.969
73200	525.156	510.166	187.997	188.546
73300	513.394	514.417	186.247	183.511
73400	541.376	514.233	190.167	191.821
73500	547.763	515.42	194.721	181.231
73600	544.324	516.069	193.421	180.82
73700	546.104	522.663	194.092	175.766
73800	546.853	524.637	193.492	176.795
73900	543.48	518.576	194.608	176.169
74000	543.047	529.013	193.326	173.626
74100	535.781	529.045	195.779	157.922
74200	538.143	529.071	196.834	169.367
74300	535.942	529.176	200.229	166.571
74400	541.344	529.07	195.99	154.083
74500	531.358	529.312	211.397	147.214
74600	532.719	533.676	212.596	138.223
74700	531.55	535.122	220.624	127.675
74800	536.923	532.375	213.222	145.44
74900	539.741	536.221	217.239	133.549
75000	540.075	537.959	221.273	127.337
75100	524.291	510.884	225.097	152.935
75200	535.723	530.322	221.329	182.308
75300	528.237	532.746	221.334	139.522
75400	524.315	533.98	223.311	142.137
75500	508.169	505.897	234.589	224.192
75600	514.088	508.49	253.112	212.041
75700	527.54	515.381	240.23	215.456
75800	515.103	516.285	248.506	205.343
75900	514.608	510.026	247.441	215.565
76000	537.09	519.632	264.091	202.031
76100	551.746	512.735	263.365	241.436
76200	540.698	515.449	263.645	252.192
76300	551.347	517.487	248.132	205.482
76400	554.989	516.696	229.696	234.775
76500	568.065	511.368	218.918	252.938
76600	567.66	518.697	219.21	244.869
76700	566.606	519.89	221.324	248.133
76800	566.828	517.795	220.694	211.263
76900	566.776	516.58	219.221	229.577
77000	566.431	526.027	221.852	183.862
77100	563.45	526.016	247.819	160.899
77200	563.591	525.795	239.307	168.571
77300	563.66	525.68	221.939	138.535
77400	566.288	525.741	227.139	174.559
77500	560.326	525.666	247.942	127.927
77600	558.936	520.891	246.077	145.266
77700	560.229	524.163	246.815	173.937
77800	559.613	524.588	231.18	155.98
77900	559.28	521.97	244.516	137.319
78000	558.804	520.882	230.96	174.576
78100	569.102	540.126	227.819	170.22
78200	566.337	524.804	226.811	174.314
78300	566.398	536.828	229.784	173.148
78400	563.695	529.189	225.214	169.441
78500	574.629	544.861	224.057	169.354
78600	568.603	536.65	221.536	169.366
78700	564.262	529.265	222.722	175.52
78800	573.93	540.881	221.715	174.885
78900	569.471	524.892	222.328	175.206
79000	562.121	523.757	221.242	179.431
79100	552.006	529.302	248.75	209.898
79200	554.922	528.37	246.317	194.31
79300	551.014	527.811	230.419	197.993
79400	554.809	527.394	227.883	185.226
79500	545.03	529.545	253.062	211.499
79600	559.029	511.824	255.132	187.967
79700	563.58	508.436	255.881	203.437
79800	553.618	524.777	254.298	201.031
79900	550.936	514.048	256.249	204.786
80000	569.938	500.396	256.57	187.075
80100	573.039	500.139	248.793	199.666
80200	571.001	500.109	242.199	190.978
80300	570.238	495.85	237.796	191.528
80400	573.791	498.336	253.952	192.995
80500	574.174	495.74	236.267	214.757
80600	579.496	521.83	254.462	196.193
80700	576.07	511.83	245.113	189.323
80800	574.27	509.174	250.795	208.466
80900	578.996	509.443	255.148	208.114
81000	581.512	523.918	256.605	188.872
81100	579.65	518.561	257.545	215.469
81200	558.068	521.396	258.844	209.954
81300	575.785	518.948	256.62	194.091
81400	581.192	517.724	259.01	214.948
81500	556.017	516.733	259.559	224.084
81600	557.565	521.714	259.455	199.116
81700	567.324	519.202	258.801	221.337
81800	565.525	522.68	259.202	216.46
81900	568.17	524.306	258.392	206.825
82000	569.342	528.218	257.66	198.301
82100	569.478	523.314	252.14	220.074
82200	569.692	518.229	256.538	223.883
82300	569.829	527.56	256.23	218.331
82400	569.79	519.338	256.846	226.926
82500	569.961	503.437	245.134	228.866
82600	564.644	518.636	232.3	227.283
82700	562.033	514.842	242.916	226.626
82800	561.122	517.989	230.258	221.38
82900	560.593	511.769	237.276	226.436
83000	559.845	524.579	229.227	220.591
83100	564.43	520.68	234.076	220.382
83200	572.068	523.417	236.187	219.093
83300	571.815	520.35	238.078	220.007
83400	569.741	522.089	230.698	220.59
83500	575.877	519.442	245.049	218.809
83600	575.915	527.105	283.981	217.879
83700	576.242	532.644	276.724	212.674
83800	578.501	522.889	274.076	212.866
83900	577.685	522.239	269.71	218.721
84000	578.617	535.457	293.932	211.338
84100	577.697	534.537	291.824	221.35
84200	569.803	521.781	290.517	222.627
84300	576.755	522.008	290.616	214.838
84400	577.397	529.661	291.781	212.075
84500	568.379	521.139	289.73	224.922
84600	584.505	508.211	286.246	220.284
84700	581.416	520.86	281.356	223.604
84800	589.58	496.005	276.732	211.014
84900	582.408	507.083	280.824	224.249
85000	591.979	476.286	267.926	209.522
85100	586.879	512.85	269.525	205.678
85200	584.382	477.822	279.55	203.562
85300	589.192	516.452	276.111	202.358
85400	590.44	489.72	273.143	202.71
85500	568.378	521.242	279.839	202.113
85600	568.356	523.778	265.519	212.985
85700	568.245	526.029	279.691	211.522
85800	567.307	523.536	269.93	207.54
85900	567.765	528.976	270.383	207.808
86000	567.247	530.49	261.181	216.235
86100	567.138	530.353	278.949	228.315
86200	567.137	529.887	268.481	228.783
86300	567.207	530.421	264.134	227.356
86400	567.228	530.453	275.001	232.048
86500	567.1	529.873	281.326	235.352
86600	565.545	523.568	270.866	222.882
86700	565.451	505.225	275.216	222.769
86800	565.742	509.656	271.93	225.018
86900	564.129	512.856	269.494	234.03
87000	563.845	500.875	258.85	215.938
87100	564.003	515.894	259.251	217.689
87200	565.231	522.369	269.845	217.09
87300	563.905	523.376	268.304	216.598
87400	566.173	510.663	278.31	216.326
87500	566.553	527.207	280.721	217.986
87600	558.297	530.757	285.967	193.602
87700	564.279	535.164	304.093	208.567
87800	559.199	536.619	301.697	217.98
87900	564.637	537.888	289.058	191.477
88000	557.945	544.524	308.893	183.527
88100	570.293	538.267	271.385	220.768
88200	557.953	534.676	282.084	199.428
88300	569.783	538.923	282.783	210.317
88400	568.56	539.174	276.709	202.596
88500	570.513	514.911	271.01	222.814
88600	572.775	519.74	292.896	236.494
88700	571.918	516.572	286.096	223.036
88800	572.873	521.627	283.161	223.571
88900	571.933	519.405	309.118	226.229
89000	573.146	521.818	320.492	256.837
89100	556.875	523.091	319.499	245.63
89200	553.687	522.273	291.612	252.091
89300	556.012	521.888	279.015	250.961
89400	560.73	522.269	296.115	243.345
89500	549.886	526.178	275.606	241.092
89600	555.793	526.188	307.354	241.574
89700	563.728	526.985	299.215	241.633
89800	561.222	527.487	297.517	241.157
89900	557.205	526.637	310.933	241.454
90000	571.838	527.938	312.302	241.888
90100	572.593	527.734	329.353	246.356
90200	573.129	527.887	323.964	242.096
90300	572.788	527.776	315.019	250.757
90400	572.163	527.859	330.491	245.164
90500	573.421	527.723	335.689	254.442
90600	575.844	527.799	330.242	295.886
90700	576.153	527.829	328.286	304.08
90800	578.175	527.752	319.142	263.512
90900	576.179	528.274	327.29	284.452
91000	578.289	528.751	318.004	320.492
91100	584.4	526.064	319.322	308.974
91200	584.868	528.723	318.831	309.269
91300	581.103	526.179	319.66	276.687
91400	583.962	523.572	320.544	316.842
91500	585.332	521.744	321.646	275.606
91600	583.392	499.437	302.289	279.344
91700	583.322	518.076	296.68	280.987
91800	582.402	496.501	300.716	286.844
91900	581.949	495.946	309.11	284.074
92000	581.942	493.392	291.855	312.302
92100	573.92	511.208	310.967	335.104
92200	567.894	503.48	299.969	319.768
92300	570.513	512.615	320.112	328.837
92400	578.557	502.045	321.868	314.686
92500	567.368	518.665	347.385	335.689
92600	566.99	518.578	354.364	333.268
92700	566.353	518.264	354.283	330.704
92800	566.428	517.602	349.021	332.09
92900	567.194	517.841	352.723	319.321
93000	566.35	517.263	355.955	318.004
93100	575.636	525.545	354.335	320.476
93200	568.192	519.127	341.573	320.277
93300	573.34	521.853	344.189	320.236
93400	566.821	517.73	336.521	319.845
93500	579.652	526.335	336.079	321.646
93600	574.429	539.069	319.691	295.728
93700	571.277	531.118	326.442	320.79
93800	573.875	529.896	316.961	301.059
93900	572.805	539.626	306.577	313.47
94000	568.527	541.672	305.839	291.855
94100	565.026	537.656	323.946	331.552
94200	565.374	538.148	316.351	303.873
94300	566.298	534.366	323.972	306.933
94400	568.37	534.876	313.26	333.941
94500	561.862	534.334	327.342	347.385
94600	584.289	535.425	346.645	349.973
94700	570.279	534.941	341.621	347.544
94800	577.672	534.995	351.55	349.586
94900	583.41	534.603	350.809	349.14
95000	598.027	536.344	354.436	355.955
95100	592.447	534.087	323.241	341.496
95200	571.473	535.929	320.171	340.884
95300	588.307	528.374	333.009	337.252
95400	583.869	531.245	329.922	348.532
95500	571.321	526.858	287.786	336.079
95600	571.177	533.185	307.689	307.859
95700	570.15	530.04	301.316	315.265
95800	569.11	534.132	298.754	316.489
95900	570.268	532.453	331.381	307.877
96000	568.306	537.233	332.01	305.839
96100	556.893	523.329	334.028	306.455
96200	559.176	521.691	334.906	316.897
96300	561.693	522.237	332.318	320.805
96400	553.24	529.914	336.437	310.531
96500	552.793	521.049	336.691	327.342
96600	577.055	526.873	337.41	320.479
96700	575.397	521.268	337.166	322.143
96800	558.378	535.161	337.242	289.726
96900	581.299	528.398	338.032	288.907
97000	583.371	538.36	338.077	280.215
97100	580.151	536.578	337.761	294.558
97200	581.238	538.225	337.813	283.542
97300	566.512	536.949	335.993	286.021
97400	570.451	537.197	335.361	293.202
97500	565.121	536.51	333.499	304.001
97600	569.584	531.134	350.59	279.81
97700	572.428	530.343	336.886	303.255
97800	574.64	520.233	354.226	275.492
97900	573.305	536.442	356.635	278.21
98000	575.429	519.278	362.411	274.19
98100	580.697	525.421	356.28	295.559
98200	580.729	526.023	355.59	285.183
98300	581.082	522.668	351.374	305.247
98400	580.071	522.704	356.408	277.702
98500	584.972	526.992	345.435	308.726
98600	569.724	530.112	333.557	308.996
98700	568.838	533.241	319.49	309.8
98800	576.669	530.597	298.815	309.847
98900	583.074	531.874	300.008	309.57
99000	565.706	534.149	289.449	312.121
99100	568.865	527.291	335.874	341.261
99200	566.438	532.799	324.061	322.734
99300	571.485	527.726	297.387	338.658
99400	566.256	526.382	330.647	320.806
99500	576.366	514.128	351.57	354.904
99600	585.964	522.934	356.516	351.003
99700	584.211	524.3	357.905	347.128
99800	590.679	515.395	353.454	349.763
99900	587.231	514.875	351.775	352.33
100000	590.952	528.204	359.434	343.326
100100	559.181	523.145	359.314	342.945
100200	583.571	527.542	359.372	343.325
100300	575.427	528.08	359.345	342.838
100400	570.63	518.66	359.416	343.122
100500	551.29	516.979	359.309	342.763
100600	559.376	531.406	358.451	325.293
100700	554.713	520.415	357.727	326.233
100800	565.912	519.439	356.355	339.349
100900	556.16	524.835	350.118	333.466
101000	567.895	534.511	346.368	316.464
101100	567.402	534.729	350.575	312.368
101200	567.105	534.899	358.532	314.951
101300	567.765	534.91	348.613	314.783
101400	567.382	534.701	361.248	303.765
101500	567.097	535.569	361.867	297.519
101600	571.817	525.435	363.096	302.653
101700	573.656	528.204	363.703	302.634
101800	571.492	529.916	372.745	300.822
101900	568.955	532.514	375.173	311.906
102000	574.417	524.255	387.395	316.032
102100	575.287	531.906	370.728	319.017
102200	575.312	527.512	370.907	329.918
102300	575.166	528.996	374.293	322.239
102400	574.441	526.931	371.994	319.353
102500	575.951	532.559	369.478	333.011
102600	566.192	522.015	363.485	333.878
102700	575.307	523.636	364.858	333.473
102800	568.381	522.315	361.228	333.956
102900	567.853	522.536	361.21	333.884
103000	565.959	518.485	360.325	334.149
103100	567.652	520.198	383.065	328.663
103200	566.103	535.472	377.144	322.831
103300	567.269	545.637	385.321	320.751
103400	566.799	544.89	372.896	330.073
103500	570.171	548.529	390.394	320.231
103600	570.066	519.415	393.662	336.307
103700	569.227	528.096	398.857	329.161
103800	569.593	522.752	400.108	325.855
103900	570.01	529.926	391.599	327.152
104000	569.125	511.805	401.382	342.238
104100	572.047	516.427	391.887	316.977
104200	570	515.698	398.208	325.214
104300	571.277	515.54	380.315	338.282
104400	572.214	517.621	396.765	336.564
104500	573.492	520.357	373.625	312.925
104600	577.684	523.732	378.447	315.443
104700	577.696	522.135	375.163	319.676
104800	573.64	525.81	375.023	319.999
104900	577.317	521.507	377.231	317.723
105000	579.325	526.031	380.013	320.438
105100	583.594	525.089	384.556	323.354
105200	580.728	525.836	385.343	320.977
105300	580.13	518.907	385.178	320.632
105400	585.725	524.67	385.965	322.789
105500	586.391	517.081	389.163	323.828
105600	586.939	526.191	392.836	356.51
105700	587.858	521.398	394.294	349.917
105800	587.182	527.502	389.923	347.301
105900	587.963	519.97	389.952	367.998
106000	587.982	543.4	395.951	378.666
106100	585.383	543.139	391.964	349.232
106200	586.55	543.192	391.976	355.012
106300	586.058	543.343	395.323	352.506
106400	585.41	543.192	395.871	371.617
106500	584.108	543.073	391.789	339.266
106600	583.275	536.912	399.533	349.66
106700	569.947	540.776	393.578	348.586
106800	578.65	542.904	404.429	348.11
106900	577.903	538.15	397.203	348.902
107000	568.975	534.88	404.695	350.745
107100	574.215	534.659	402.992	346.296
107200	577.635	534.697	402.406	329.189
107300	577.344	534.512	402.564	328.571
107400	569.841	534.487	402.558	340.359
107500	577.824	534.446	402.4	325.297
107600	592.938	518.796	405.762	363.219
107700	580.024	531.983	402.876	349.185
107800	589.139	530.274	405.648	341.46
107900	582.124	523.193	403.527	339.593
108000	601.743	516.679	409.403	367.028
108100	601.123	518.293	410.339	363.677
108200	593.159	518.181	411.102	315.66
108300	592.126	516.988	410.265	356.362
108400	592.225	518.261	412.902	325.048
108500	588.288	518.529	419.25	313.353
108600	584.254	533.377	421.678	358.549
108700	580.017	521.186	421.643	387.087
108800	575.889	551.958	421.379	339.459
108900	584.063	547.169	419.338	345.336
109000	573.881	552.181	421.967	396.97
109100	579.17	520.349	422.362	382.481
109200	576.885	528.162	422.158	396.837
109300	593.747	549.737	422.637	384.616
109400	575.86	517.945	422.67	389.119
109500	594.249	516.587	422.867	381.408
109600	578.987	518.559	422.223	353.021
109700	594.236	517.723	421.834	373.227
109800	593.604	518.689	420.821	371.842
109900	576.792	517.599	422.618	361.682
110000	574.691	519.286	420.458	347.978
110100	572.93	530.585	421.311	353.254
110200	573.779	527.605	421	353.669
110300	572.374	533.182	421.171	349.427
110400	573.371	534.708	420.85	353.613
110500	572.03	535.885	421.354	355.364
110600	592.118	536.139	422.506	362.536
110700	581.217	538.951	422.388	373.817
110800	574.521	538.166	422.728	372.882
110900	583.748	542.112	426.672	359.888
111000	592.814	542.41	428.237	376.78
111100	579.725	524.423	384.86	376.256
111200	576.799	522.447	400.956	375.088
111300	578.528	523.968	396.172	375.168
111400	584.248	525.285	386.402	376.162
111500	565.904	522.182	383.44	374.976
111600	563.225	534.022	387.853	365.668
111700	561.977	531.808	386.057	363.778
111800	561.891	529.896	417.348	364.818
111900	562.524	526.785	397.366	359.332
112000	560.005	534.359	418.117	359.302
112100	562.671	518.791	418.737	363.472
112200	574.023	522.763	418.264	361.967
112300	581.371	533.848	420.139	363.688
112400	571.075	532.132	419.864	360.655
112500	588.699	518.222	420.658	365.964
112600	584.403	527.426	444.513	382.527
112700	583.858	519.531	429.774	370.858
112800	582.071	536.674	422.338	385.254
112900	583.041	532.731	428.244	385.3
113000	579.705	537.623	446.758	386.334
113100	580.605	530.444	445.431	365.58
113200	579.911	529.875	443.184	378.503
113300	579.739	534.967	442.65	371.749
113400	580.398	527.407	443.696	381.824
113500	580.845	521.573	442.612	363.583
113600	577.833	520.918	441.029	365.314
113700	576.651	521.333	440.789	366.946
113800	579.969	520.735	441.906	363.954
113900	577.833	521.061	441.416	365.146
114000	576.1	520.669	439.958	367.294
114100	576.247	540.67	439.402	370.432
114200	577.185	522.034	439.572	368.117
114300	576.509	532.995	439.711	370.095
114400	576.78	527.949	439.864	373.415
114500	577.472	541.092	439.364	376.368
114600	576.239	528.815	438.761	372.845
114700	576.793	528.183	438.945	372.252
114800	575.899	537.345	439.057	374.201
114900	576.164	531.341	439.263	372.176
115000	575.419	524.993	438.697	371.402
115100	574.472	523.514	438.504	369.907
115200	574.293	517.264	431.942	370.596
115300	574.191	518.562	434.562	371.026
115400	574.03	522.808	430.479	370.772
115500	573.883	516.595	427.252	368.181
115600	575.014	522.423	436.344	369.867
115700	575.903	532.664	435.49	382.128
115800	574.097	525.325	434.059	374.853
115900	575.946	530.749	433.284	372.595
116000	576.467	541.09	443.958	385.33
116100	576.35	540.085	458.373	388.6
116200	576.328	539.588	445.311	390.192
116300	576.326	540.182	447.493	387.365
116400	576.303	536.389	455.282	386.867
116500	576.294	535.849	460.253	393.285
116600	573.022	535.885	460.513	393.463
116700	575	546.232	463.404	394.195
116800	574.771	536.003	462.915	393.428
116900	575.568	535.866	462.694	394.036
117000	572.286	546.306	463.564	394.258
117100	573.09	529.959	443.45	391.503
117200	573.843	527.733	461.968	391.795
117300	574.179	531.971	460.298	391.757
117400	574.431	534.021	457.047	391.24
117500	575.263	525.895	441.4	389.679
117600	570.764	530.816	441.922	393.074
117700	561.481	526.399	441.799	393.746
117800	574.058	527.338	441.991	397.577
117900	566.35	527.299	442.298	390.703
118000	555.83	536.791	442.351	406.173
118100	575.352	538.895	452.52	409.94
118200	564.413	537.567	447.398	414.847
118300	587.784	537.589	443.851	415.515
118400	570.551	537.369	452.061	421.735
118500	587.846	538.952	460.136	425.323
118600	586.515	533.671	457.355	415.368
118700	585.718	518.97	458.132	404.891
118800	586.235	519.911	456.701	421.28
118900	587.375	529.472	458.09	424.281
119000	585.045	515.463	454.923	397.202
119100	582.792	516.764	446.401	398.149
119200	584.554	525.387	452.033	398.585
119300	584.791	526.96	450.5	397.748
119400	584.975	524.706	444.37	398.242
119500	580.437	530.925	437.403	398.672
119600	582.876	530.129	437.384	425.755
119700	581.914	529.518	435.441	407.114
119800	580.486	529.663	433.314	411.321
119900	580.799	529.532	435.04	408.374
120000	583.802	529.312	432.217	434.069
120100	584.128	531.014	441.89	429.08
120200	584.172	533.129	436.887	430.616
120300	584.304	530.672	437.309	427.506
120400	583.953	532.921	434.616	426.936
120500	584.307	533.902	445.043	425.675
120600	580.997	527.309	440.505	425.504
120700	580.008	530.485	444.628	425.541
120800	582.438	533.227	438.304	425.169
120900	579.295	529.257	443.5	425.297
121000	574.474	522.392	436.353	424.98
121100	575.602	530.363	438.014	425.967
121200	575.548	543.784	437.041	426.189
121300	574.815	543.576	437.314	430.804
121400	575.139	541.062	437.636	427.729
121500	576.531	546.109	439.639	430.912
121600	578.121	546.157	435.346	451.392
121700	585.22	546.211	434.113	432.228
121800	578.697	546.327	439.003	436.776
121900	576.959	546.161	436.137	449.778
122000	587.283	546.359	430.717	454.595
122100	587.106	544.499	434.625	444.57
122200	585.551	544.67	438.932	436.877
122300	585.534	544.431	432.858	426.709
122400	586.096	545.535	438.779	415.971
122500	584.218	543.85	439.338	405.358
122600	601.012	532.854	453.159	407.806
122700	595.759	537.365	445.103	411.489
122800	588.973	529.942	444.486	413.11
122900	587.111	538.551	440.419	412.385
123000	602.719	527.607	456.704	413.68
123100	598.971	527.37	439.931	413.303
123200	600.545	527.415	447.341	412.757
123300	601.899	527.486	453.348	413.561
123400	600.477	527.261	450.157	412.891
123500	598.625	527.251	430.988	412.559
123600	594.774	537.677	443.914	421.464
123700	592.253	533.144	432.53	413.988
123800	593.832	538.482	443.744	420.929
123900	594.942	532.012	439.227	418.352
124000	591.902	545.672	444.751	424.944
124100	576.721	538.105	435.37	447.712
124200	591.212	545.464	433.119	426.432
124300	580.982	530.256	442.592	425.942
124400	580.427	537.906	429.483	426.433
124500	575.097	529.413	429.039	453.483
124600	576.176	527.899	431.587	446.497
124700	576.15	525.904	431.272	447.577
124800	576.627	526.848	431.413	437.716
124900	575.889	526.147	430.586	446.924
125000	577.212	524.001	432.297	425.399
125100	573.216	522.467	439.971	435.924
125200	575.61	523.098	449.54	435.784
125300	576.286	521.691	449.744	432.242
125400	573.707	523.234	448.424	430.95
125500	572.98	521.269	454.326	438.715
125600	577.19	527.403	448.254	438.265
125700	581.003	528.125	449.506	434.359
125800	585.849	523.283	448.547	432.119
125900	584.15	523.631	450.483	429.557
126000	585.94	528.538	447.405	424.242
126100	563.152	528.002	446.972	438.272
126200	564.641	526.926	447.024	441.417
126300	568.012	527.284	447.278	427.014
126400	575.077	527.618	447.223	431.234
126500	555.876	526.76	446.937	446.227
126600	578.825	532.892	446.257	421.342
126700	574.966	531.754	446.548	431.452
126800	578.589	528.863	446.704	440.824
126900	568.264	534.66	446.203	427.881
127000	578.842	534.677	446.037	406.711
127100	579.107	522.204	438.901	417.898
127200	579.418	525.506	445.706	408.491
127300	579.588	527.712	445.354	410.086
127400	580.151	530.781	445.843	407.058
127500	580.504	522.047	424.753	422.647
127600	574.257	527.214	438.459	425.887
127700	580.394	525.041	443.69	429.958
127800	572.21	528.5	448.711	428.038
127900	578.051	524.053	424.941	435.299
128000	568.471	534.359	450.937	440.457
128100	569.312	535.457	457.196	440.049
128200	578.351	535.196	452.279	438.81
128300	586.165	536.706	455.321	440.294
128400	577.006	536.856	464.648	438.193
128500	591.835	539.048	465.898	437.771
128600	576.841	534.96	461.455	434.315
128700	576.383	536.106	455.782	433.854
128800	581.542	529.531	451.136	433.635
128900	585.932	536.941	447.434	431.571
129000	572.609	521.045	443.465	430.336
129100	581.137	523.777	453.832	429.283
129200	579.568	523.375	446.507	427.944
129300	581.259	521.336	446.441	425.612
129400	576.439	523.156	453.669	419.65
129500	586.82	527.386	462.417	418.244
129600	603.237	534.846	475.274	421.629
129700	598.696	530.464	465.649	438.447
129800	589.671	534.449	470.438	425.246
129900	598.154	537.462	473.11	427.016
130000	612.123	544.486	475.341	440.221
130100	577.229	538.669	455.711	426.769
130200	608.555	533.818	441.406	434.758
130300	579.661	536.566	453.44	426.721
130400	597.668	532.153	447.597	432.187
130500	568.319	531.723	436.862	419.175
130600	575.568	524.595	453.655	437.483
130700	572.056	530.489	461.811	432.701
130800	572.775	530.216	451.254	435.919
130900	578.511	527.265	459.805	427.301
131000	583.086	524.12	463.145	440.989
131100	581.008	523.987	461.405	444.231
131200	581.642	522.586	462.666	441.543
131300	582.673	523.756	457.982	443.565
131400	580.82	523.534	458.599	441.493
131500	580.64	521.804	453.922	444.427
131600	580.613	524.355	451.879	445.543
131700	579.179	521.823	451.172	448.805
131800	580.459	523.104	449.534	452.215
131900	579.234	523.395	452.239	450.319
132000	578.837	524.459	449.135	452.246
132100	589.242	521.717	449.821	448.312
132200	588.752	521.683	453.044	445.281
132300	582.057	522.471	453.011	442.61
132400	590.973	521.867	458.052	441.417
132500	592.603	519.878	461.877	434.071
132600	596.138	551.038	459.629	428.137
132700	595.723	534.293	458.217	427.767
132800	595.613	547.843	459.968	427.146
132900	593.846	548.182	460.788	429.348
133000	596.206	552.214	457.995	426.134
133100	594.205	537.717	457.953	437.715
133200	596.189	538.46	457.948	435.23
133300	593.567	542.952	457.987	426.225
133400	593.053	541.042	457.862	428.874
133500	593.002	530.736	457.667	440.593
133600	591.069	531.206	453.377	454.973
133700	578.511	533.516	456.682	460.215
133800	579.287	535.62	452.146	463.051
133900	583.946	533.591	455.332	442.654
134000	578.195	541.569	445.76	466.688
134100	584.545	538.364	446.23	435.384
134200	594.086	539.886	446.271	460.566
134300	601.375	540.161	445.777	461.314
134400	605.188	538.057	446.202	437.02
134500	609.91	535.454	446.474	429.9
134600	573.059	535.859	451.126	435.499
134700	608.073	535.829	451.862	445.836
134800	574.642	536.052	447.127	431.468
134900	587.547	536.072	452.024	440.645
135000	568.012	536.683	456.783	446.011
135100	571.463	539.519	453.497	447.976
135200	575.096	539.637	452.826	447.937
135300	573.388	541.161	454.569	446.208
135400	572.697	540.52	455.174	447.757
135500	575.531	542.682	452.626	448.214
135600	586.921	542.464	454.333	444.437
135700	578.166	542.411	456.008	447.447
135800	582.84	542.024	455.431	441.093
135900	578.641	542.479	454.928	441.902
136000	587.697	541.853	457.619	439.014
136100	587.359	540.892	459.57	439.392
136200	587.322	540.878	458.723	439.732
136300	587.335	541.356	458.225	439.824
136400	587.191	541.115	457.746	439.251
136500	587.037	540.7	461.766	440.491
136600	587.371	540.592	455.261	436.747
136700	589.394	540.668	458.019	437.472
136800	589.082	540.107	455.207	439.738
136900	590.456	539.875	454.204	436.073
137000	591.166	539.789	454.016	435.126
137100	598.701	540.521	451.469	442.758
137200	592.027	540.981	450.699	443.935
137300	602.117	541.069	450.147	443.411
137400	594.806	539.935	451.697	441.053
137500	602.23	542.267	446.599	449.035
137600	588.007	541.802	446.063	433.297
137700	596.327	541.123	446.522	434.808
137800	587.971	540.473	446.37	443.117
137900	598.861	542.228	446.153	431.661
138000	585.373	540.174	445.681	429.887
138100	586.734	539.36	465.697	455.314
138200	587.24	538.801	454.09	458.804
138300	587.39	539.452	447.989	443.51
138400	586.431	538.633	448	455.652
138500	587.852	538.607	466.269	462.142
138600	584.603	537.662	452.276	452.481
138700	583.706	534.823	442.816	454.471
138800	582.923	538.072	445.311	457.681
138900	581.77	538.506	461.034	458.164
139000	580.912	532.607	441.784	445.458
139100	587.526	535.725	454.085	443.085
139200	587.673	541.255	454.91	444.534
139300	586.413	536.2	446.786	444.487
139400	591.647	539.259	457.148	444.977
139500	592.883	549.694	460.247	441.403
139600	585.786	543.992	461.291	439.603
139700	588.224	547.272	461.236	440.841
139800	590.133	544.928	460.287	438.735
139900	587.011	546.691	460.291	438.095
140000	583.958	543.785	462.189	434.886
140100	584.062	539.446	463.854	436.065
140200	583.982	540.848	463.247	442.536
140300	584.039	538.623	466.749	435.538
140400	584.082	540.218	463.892	438.055
140500	584.095	538.58	467.697	443.751
140600	586.347	532.503	459.075	434.948
140700	592.123	538.52	454.372	440.925
140800	586.582	536.479	457.206	436.007
140900	591.603	533.92	455.168	442.03
141000	592.863	529.828	449.337	432.184
141100	596.13	530.976	449.333	430.889
141200	594.513	530.231	449.265	432.003
141300	595.905	530.683	449.272	431.156
141400	595.384	531.132	449.336	430.618
141500	597.921	531.324	449.262	430.605
141600	592.339	531.531	459.239	434.62
141700	571.24	532.486	457.246	447.97
141800	571.194	531.675	454.655	443.208
141900	588.718	531.766	458.381	437.76
142000	565.633	534.594	461.435	450.273
142100	574.649	534.66	467.387	444.247
142200	576.911	536.883	466.962	443.014
142300	574.447	536.371	473.831	450.27
142400	590.631	536.524	475.243	443.395
142500	591.465	537.635	480.517	442.022
142600	586.004	543.631	466.758	448.265
142700	587.123	543.004	479.776	442.566
142800	589.873	541.06	465.081	451.951
142900	588.061	545.934	464.817	449.15
143000	585.298	547.39	460.165	452.155
143100	587.168	536.196	460.269	454.215
143200	585.451	544.492	460.344	454.862
143300	593.096	546.591	460.629	459.294
143400	586.034	536.034	460.385	458.735
143500	597.619	532.545	460.674	462.599
143600	590.796	534.057	466.924	454.207
143700	597.096	538.112	461.168	449.61
143800	592.745	535.121	465.34	461.382
143900	591.46	533.14	460.719	448.913
144000	585.784	540.801	468.924	448.576
144100	594.169	535.741	464.172	447.934
144200	588.379	540.519	463.77	447.582
144300	588.655	539.138	465.491	447.143
144400	596.598	535.896	464.217	448.184
144500	601.439	535.559	462.551	446.043
144600	599.435	538.3	465.644	446.592
144700	600.994	539.843	473.595	446.678
144800	599.93	543.841	463.749	448.816
144900	596.871	539.812	463.267	448.06
145000	581.807	543.935	479.615	449.353
145100	577.299	540.308	478.804	448.292
145200	579.77	540.896	473.919	444.404
145300	575.662	543.911	477.38	439.728
145400	568.318	542.088	474.457	439.904
145500	566.411	538.681	473.413	438.229
145600	575.059	537.492	472.548	442.025
145700	585.6	537.911	467.426	453.405
145800	570.877	537.836	464.307	443.661
145900	587.395	538.187	465.983	450.26
146000	599.373	537.207	463.982	461.823
146100	587.347	543.576	462.896	469.953
146200	593.55	537.432	459.408	471.931
146300	580.657	546.155	460.617	469.848
146400	581.506	540.387	462.904	467.802
146500	580.565	547.568	458.787	472.032
146600	573.373	543.252	473.945	455.23
146700	578.939	546.066	467.142	448.785
146800	579.975	537.979	474.196	450.803
146900	574.589	539.971	466.088	466.689
147000	573.34	535.71	475.921	442.973
147100	582.451	543.575	476.105	439.671
147200	574.333	535.731	476.124	437.722
147300	588.711	538.289	475.924	440.137
147400	589.117	537.833	476.253	437.917
147500	589.446	544.701	476.312	435.003
147600	589.121	553.504	472.077	433.453
147700	588.814	552.132	475.974	432.017
147800	587.93	547.857	466.03	429.179
147900	588.132	546.693	464.711	427.16
148000	587.037	553.542	459.62	427.121
148100	587.067	547.435	455.649	427.666
148200	590.626	544.457	454.072	429.998
148300	596.289	550.683	449.864	429.778
148400	593.244	538.016	455.67	430.414
148500	597.802	530.17	448.652	430.892
148600	598.295	539.655	455.795	430.448
148700	597.995	531.599	451.158	429.735
148800	598.537	534.575	462.025	430.752
148900	597.904	537.108	452.079	429.508
149000	598.638	540.227	468.073	428.799
149100	593.446	537.13	462.958	435.806
149200	595.452	534.281	452.157	437.513
149300	593.831	536.925	451.214	429.176
149400	593.029	534.244	456.359	454.989
149500	590.813	529.573	449.357	456.092
149600	583.936	543.052	450.755	445.14
149700	584.089	535.666	453.028	451.393
149800	581.871	545.628	461.839	453.639
149900	588.909	541.524	451.479	443.301
