# Supplementary material
Source: ML conference proceedings conference paper supplement (https://openreview.net/forum?id=4BsrGHtvW5)
Supplement: supplementary_material [file sample_spread.xlsx]

## Sheet: Sheet1
0	-40.6269	-41.4224	-42.1008	-40.8746
100	-39.4568	-38.3264	-38.9038	-39.0954
200	-39.088	-39.2454	-41.0333	-39.3692
300	-37.6185	-35.5028	-38.6622	-39.4858
400	-35.1329	-35.7735	-35.6564	-39.0025
500	-36.4381	-38.3264	-38.9038	-39.0954
600	-38.3437	-38.5629	-39.6621	-39.3022
700	-39.2656	-38.7391	-40.5412	-39.1523
800	-37.1052	-39.2231	-40.8048	-39.3279
900	-39.4044	-38.9455	-40.5898	-39.2614
1000	-39.088	-39.2454	-41.0333	-39.3692
1100	-38.0829	-37.5706	-39.1324	-39.4813
1200	-36.8011	-38.1014	-39.554	-39.4742
1300	-38.9979	-38.7982	-39.2631	-39.3739
1400	-38.4453	-37.1534	-39.3227	-39.3705
1500	-37.6185	-35.5028	-38.6622	-39.4858
1600	-36.3625	-35.7699	-38.1998	-39.413
1700	-36.1216	-35.5301	-37.392	-39.0067
1800	-37.5135	-35.74	-38.0272	-39.0152
1900	-37.3286	-35.7717	-36.4808	-39.0597
2000	-35.1329	-35.7735	-35.6564	-39.0025
2100	-34.9663	-35.793	-37.5327	-38.4094
2200	-34.9638	-35.7739	-37.7004	-38.6236
2300	-34.0968	-35.8602	-37.0499	-38.212
2400	-35.0813	-35.8451	-35.9631	-38.7254
2500	-33.7959	-36.1019	-38.0009	-38.0231
2600	-33.8337	-37.0991	-37.993	-38.031
2700	-33.8513	-36.8155	-37.9833	-38.0314
2800	-33.9447	-36.7002	-37.9022	-38.1416
2900	-33.9715	-36.837	-37.8911	-38.0652
3000	-33.9943	-37.3906	-37.714	-38.2102
3100	-33.3286	-34.487	-37.3436	-37.5288
3200	-33.1389	-37.1337	-37.3971	-37.7129
3300	-33.5822	-36.3901	-36.8975	-38.1412
3400	-33.4793	-35.4123	-37.6636	-38.1197
3500	-32.6534	-34.1242	-36.5807	-37.3881
3600	-33.3927	-34.2823	-34.5049	-37.3424
3700	-32.8378	-34.135	-34.6119	-37.3721
3800	-34.2558	-34.2417	-34.2688	-37.3446
3900	-33.6055	-34.2011	-35.3479	-37.3496
4000	-35.0805	-34.3272	-34.0204	-37.3397
4100	-34.5753	-34.2922	-34.1067	-35.5099
4200	-33.6241	-34.1179	-34.0465	-36.3015
4300	-32.4555	-33.9759	-34.0527	-36.9324
4400	-34.5554	-34.1983	-34.1181	-37.2001
4500	-32.3901	-33.5861	-34.1369	-34.9385
4600	-31.8691	-33.0954	-34.8565	-34.7768
4700	-31.1996	-32.6738	-34.1725	-34.4165
4800	-30.7894	-32.1579	-34.7613	-34.1903
4900	-32.2593	-32.7551	-34.4024	-34.3893
5000	-30.7103	-32.1089	-34.8577	-34.1597
5100	-30.7047	-32.1151	-37.5913	-36.5849
5200	-30.6819	-32.7111	-36.9194	-36.261
5300	-30.6904	-32.4675	-35.6843	-35.0278
5400	-30.5548	-32.2181	-35.5084	-34.454
5500	-30.5468	-33.9457	-38.3164	-36.8244
5600	-31.7416	-31.4999	-38.0954	-36.8513
5700	-31.6742	-32.5744	-38.3074	-36.8341
5800	-30.7402	-33.2591	-38.3013	-36.8301
5900	-30.9729	-32.3341	-38.1203	-36.8398
6000	-32.4452	-31.4082	-37.9872	-36.8549
6100	-31.6536	-31.525	-36.7533	-34.8914
6200	-32.3582	-31.6148	-36.1546	-36.6146
6300	-32.2471	-31.618	-37.058	-35.9967
6400	-31.7647	-31.6459	-36.3709	-35.8265
6500	-31.4774	-31.6589	-36.1418	-34.6524
6600	-30.8598	-32.3787	-36.1125	-34.6645
6700	-30.8946	-32.0357	-36.0237	-34.6683
6800	-30.4958	-32.505	-35.9635	-34.6597
6900	-31.1973	-32.9464	-36.0632	-34.6628
7000	-30.2103	-33.2092	-35.7653	-34.6721
7100	-30.1719	-32.3848	-35.6547	-34.6163
7200	-30.1355	-32.6968	-33.1564	-34.1339
7300	-30.209	-32.6114	-35.6006	-34.2852
7400	-30.1945	-32.4938	-34.9082	-34.274
7500	-30.1049	-32.3701	-31.5103	-34.0404
7600	-29.4315	-30.8498	-33.0105	-37.4932
7700	-29.8642	-31.939	-32.7889	-36.0491
7800	-29.851	-31.0033	-34.1986	-34.899
7900	-29.3308	-30.6573	-34.6789	-35.4194
8000	-29.2692	-30.5916	-34.7801	-38.2102
8100	-30.3409	-30.9244	-33.7646	-37.4333
8200	-30.4782	-30.7218	-34.282	-37.7401
8300	-30.9856	-30.6485	-34.5435	-37.8196
8400	-29.9446	-31.5984	-34.7501	-37.4029
8500	-31.2689	-31.6716	-32.5439	-37.3881
8600	-31.5356	-30.9529	-32.1161	-37.3614
8700	-31.8601	-30.1476	-31.3853	-37.363
8800	-31.3544	-30.7414	-32.1042	-37.3856
8900	-31.8837	-30.2933	-32.0161	-37.3426
9000	-31.8847	-29.4276	-31.1295	-37.3397
9100	-30.8467	-32.0104	-30.9456	-34.7857
9200	-31.7361	-32.3057	-31.0695	-35.0658
9300	-30.1661	-32.2386	-30.8289	-37.0706
9400	-30.5475	-30.2488	-30.9171	-36.4849
9500	-30.0762	-32.4087	-30.8202	-34.7136
9600	-31.0437	-32.6513	-31.8333	-34.7906
9700	-31.4601	-32.6779	-31.9958	-35.1949
9800	-31.7838	-32.582	-32.4454	-35.4884
9900	-31.1191	-32.4657	-31.0154	-35.7389
10000	-31.7912	-32.6803	-32.4685	-36.4202
10100	-31.292	-32.3349	-31.8531	-33.1664
10200	-31.6378	-32.4887	-32.1043	-33.7173
10300	-30.6815	-32.0461	-32.2508	-35.0799
10400	-31.3734	-32.5535	-32.2051	-33.9096
10500	-30.6583	-31.975	-31.603	-33.1609
10600	-30.448	-29.9579	-31.8432	-32.8453
10700	-30.3176	-31.7856	-33.334	-33.1424
10800	-30.2989	-31.5444	-32.3001	-33.0089
10900	-30.3708	-30.4013	-32.2008	-33.0065
11000	-30.2789	-29.0694	-33.4901	-32.8404
11100	-29.9478	-29.1787	-33.3557	-32.468
11200	-27.6723	-29.4348	-33.2804	-32.6122
11300	-29.7039	-29.5852	-33.1177	-32.1109
11400	-30.1316	-29.1546	-33.0426	-32.6538
11500	-27.6341	-29.8579	-32.6335	-31.7758
11600	-26.3539	-28.5024	-31.7928	-31.8417
11700	-26.2553	-29.837	-32.2488	-33.1103
11800	-27.4404	-28.8252	-32.064	-32.4093
11900	-26.6496	-29.4698	-32.0706	-32.1403
12000	-26.2453	-28.367	-31.5588	-33.4352
12100	-27.7936	-29.4354	-31.0382	-31.4466
12200	-26.4249	-29.3594	-30.1865	-32.8901
12300	-27.528	-28.839	-30.3673	-32.8077
12400	-26.8529	-29.0345	-31.0904	-32.7409
12500	-27.8879	-29.5985	-30.1068	-30.8638
12600	-28.025	-28.7588	-30.2418	-30.2314
12700	-28.0262	-29.4986	-31.5174	-30.3688
12800	-27.8934	-29.2744	-30.3139	-30.5951
12900	-27.959	-28.7013	-30.8271	-29.9005
13000	-28.2087	-28.6923	-32.0492	-29.8492
13100	-27.3805	-28.7449	-30.7413	-30.3728
13200	-27.2622	-30.1864	-30.9087	-30.2554
13300	-27.9788	-31.1168	-31.4963	-30.296
13400	-26.8151	-31.2278	-29.3994	-30.4505
13500	-26.0981	-31.2353	-28.816	-30.4646
13600	-26.2067	-29.1647	-28.9131	-30.6764
13700	-26.4279	-30.0546	-28.8748	-31.0116
13800	-26.1576	-30.2437	-28.8603	-30.6398
13900	-26.598	-29.5783	-28.8758	-31.157
14000	-26.6175	-27.9213	-28.9449	-31.3263
14100	-25.7731	-27.8838	-28.8266	-31.2752
14200	-26.3364	-27.6524	-28.9231	-31.2613
14300	-26.4595	-27.6814	-28.9184	-31.1811
14400	-25.7781	-27.7917	-28.7888	-31.2515
14500	-25.5914	-27.5298	-28.7692	-31.1726
14600	-26.5347	-27.8394	-29.5448	-30.3815
14700	-25.9463	-28.0219	-29.8103	-31.0293
14800	-26.3779	-27.6236	-30.3949	-30.8355
14900	-25.7024	-27.7841	-30.5794	-29.9383
15000	-27.7553	-28.0849	-30.6521	-29.913
15100	-27.4796	-28.0093	-30.7705	-29.7217
15200	-27.6976	-27.8542	-30.832	-29.7841
15300	-26.8757	-27.822	-30.8222	-29.8279
15400	-27.4953	-27.9259	-30.8232	-29.8892
15500	-26.2832	-27.7431	-30.8971	-29.6774
15600	-25.5524	-27.7278	-30.0969	-29.7444
15700	-25.8709	-27.4821	-30.2393	-29.7798
15800	-25.736	-27.6049	-29.711	-29.8973
15900	-25.8761	-27.5902	-30.6459	-30.1152
16000	-25.5346	-27.285	-29.0186	-30.389
16100	-23.7065	-27.2567	-27.9946	-30.3531
16200	-24.6022	-27.1877	-28.7836	-30.3093
16300	-23.3515	-27.2076	-28.5557	-30.0758
16400	-24.9689	-27.2694	-27.8061	-30.0712
16500	-23.1659	-27.1709	-27.4941	-30.0438
16600	-23.2036	-27.4806	-28.1322	-29.8901
16700	-23.4045	-27.5684	-28.1606	-29.7258
16800	-23.6144	-27.2394	-27.8047	-29.7394
16900	-24.2216	-27.4999	-27.9595	-29.2874
17000	-24.3026	-27.8721	-28.5807	-29.2115
17100	-23.7244	-27.9004	-28.1325	-30.1453
17200	-23.1065	-27.8727	-27.9951	-29.8951
17300	-23.0377	-27.9268	-28.5431	-29.7418
17400	-24.1427	-28.0543	-28.4261	-29.3632
17500	-22.9515	-28.0558	-27.8082	-31.044
17600	-21.709	-27.0885	-28.6878	-31.1814
17700	-22.4586	-28.0216	-28.0317	-31.0755
17800	-21.182	-27.4567	-29.904	-31.1063
17900	-21.3457	-27.773	-28.3806	-31.1919
18000	-21.1593	-26.1432	-29.9054	-31.2239
18100	-21.6843	-26.1265	-29.3522	-29.4482
18200	-21.5623	-26.1425	-28.8975	-30.5849
18300	-21.5625	-26.131	-29.6039	-30.3146
18400	-21.5534	-26.1284	-29.1653	-30.8535
18500	-21.771	-26.1187	-27.1142	-29.3058
18600	-21.8959	-25.7811	-27.5096	-29.9472
18700	-22.2708	-25.9706	-27.7567	-29.7476
18800	-22.08	-25.6431	-27.8136	-29.6676
18900	-22.5336	-25.7022	-27.9119	-29.5347
19000	-22.7538	-25.6427	-29.8324	-30.1328
19100	-22.3658	-25.7995	-29.3046	-30.0335
19200	-21.9061	-25.7142	-29.6343	-29.4179
19300	-22.463	-25.9153	-29.5168	-29.3776
19400	-22.4141	-25.7584	-29.8083	-29.4285
19500	-21.7518	-26.1387	-28.9215	-29.1754
19600	-22.3952	-26.9424	-28.5749	-28.5893
19700	-22.551	-26.794	-26.6667	-28.5081
19800	-21.9338	-27.0123	-27.524	-28.6591
19900	-22.3835	-26.7615	-28.0248	-28.6844
20000	-22.6001	-27.3755	-26.5812	-28.4691
20100	-22.5124	-27.2568	-26.5666	-27.514
20200	-22.5419	-27.3163	-26.5681	-27.6974
20300	-22.5096	-27.0867	-26.578	-28.1743
20400	-22.5912	-27.2895	-26.5769	-28.1727
20500	-22.5066	-27.0125	-26.5663	-27.2924
20600	-22.4164	-27.4501	-26.7986	-28.9195
20700	-22.3414	-27.1589	-26.6312	-28.593
20800	-22.4912	-27.3311	-26.5696	-29.0277
20900	-22.0086	-27.7425	-26.5766	-27.7842
21000	-21.981	-27.861	-26.9098	-29.3868
21100	-22.2162	-27.7138	-28.1234	-29.3593
21200	-22.2862	-25.3958	-27.2907	-29.3763
21300	-22.047	-26.108	-28.1858	-29.3555
21400	-22.1686	-25.5128	-26.9308	-29.3294
21500	-22.4484	-23.1659	-28.2226	-29.3231
21600	-22.4077	-23.9657	-27.5737	-28.8895
21700	-22.4461	-23.3022	-26.7698	-28.3358
21800	-22.4334	-23.8206	-27.4748	-28.9289
21900	-22.4246	-23.5685	-26.6765	-28.3112
22000	-22.4012	-24.3026	-26.6517	-27.7628
22100	-22.3254	-24.282	-27.1231	-26.845
22200	-22.0085	-24.2829	-26.7478	-27.4927
22300	-21.8225	-24.297	-26.7248	-27.0967
22400	-21.8001	-24.3019	-26.7221	-27.4714
22500	-21.5405	-24.2722	-27.2359	-26.2754
22600	-21.5675	-25.0276	-26.9038	-26.9079
22700	-21.837	-24.5015	-26.1035	-26.7396
22800	-21.8488	-24.861	-26.5487	-26.9345
22900	-21.7314	-24.9095	-26.8694	-27.2973
23000	-21.9207	-25.2879	-26.0883	-27.3297
23100	-21.6153	-24.6586	-26.1884	-27.4871
23200	-21.8624	-24.9353	-26.101	-27.6651
23300	-21.7841	-23.9234	-26.1747	-27.6628
23400	-21.7793	-24.0519	-26.2024	-28.001
23500	-21.5194	-23.8154	-26.3837	-28.0896
23600	-21.6773	-24.1297	-25.6001	-27.7428
23700	-21.9642	-24.6975	-25.5771	-27.4481
23800	-21.8539	-23.9944	-26.2279	-27.5029
23900	-21.9682	-24.5852	-25.8571	-28.0326
24000	-22.0555	-25.1784	-25.4846	-27.263
24100	-22.6378	-24.5576	-25.5065	-27.7102
24200	-22.453	-23.7131	-26.1017	-27.6526
24300	-22.2674	-23.591	-25.9448	-27.303
24400	-22.5798	-24.6252	-25.5312	-27.6078
24500	-22.6784	-23.2623	-26.1987	-27.8836
24600	-22.6654	-23.3594	-27.3905	-26.1782
24700	-22.671	-23.3368	-26.9873	-25.4143
24800	-22.6638	-23.4589	-27.0247	-27.367
24900	-22.6737	-23.4558	-26.3046	-27.6206
25000	-22.6627	-23.465	-27.6674	-25.3191
25100	-22.3183	-22.7483	-26.7156	-25.8074
25200	-22.5972	-23.4537	-27.319	-25.5956
25300	-22.3729	-22.9602	-27.6635	-25.3448
25400	-22.0805	-22.7446	-26.4825	-25.3906
25500	-22.0044	-22.6804	-26.4555	-26.2864
25600	-21.93	-22.6789	-26.1785	-26.2493
25700	-21.9559	-22.6802	-25.9194	-26.1529
25800	-21.9075	-22.679	-26.3392	-26.1534
25900	-21.8631	-22.6792	-25.9741	-26.2317
26000	-21.8511	-22.6784	-25.8934	-26.1102
26100	-21.7052	-22.6725	-25.961	-26.3412
26200	-21.6112	-22.6736	-25.9146	-26.2827
26300	-21.7534	-22.6728	-25.9584	-26.127
26400	-21.6686	-22.6735	-25.9203	-26.1781
26500	-21.5123	-22.6627	-26.0722	-26.378
26600	-21.2916	-22.8643	-26.6064	-26.0008
26700	-21.3707	-22.7819	-26.3549	-25.8116
26800	-21.3843	-22.8672	-26.7315	-25.8209
26900	-21.4784	-22.9027	-26.7071	-26.2134
27000	-21.2767	-23.0044	-26.9232	-25.7324
27100	-21.7925	-23.0506	-25.9695	-26.0154
27200	-21.7545	-23.8124	-25.2915	-26.4116
27300	-21.9023	-23.4392	-26.1173	-26.5415
27400	-21.6699	-24.0089	-25.163	-26.794
27500	-21.9339	-24.3026	-24.864	-26.9879
27600	-21.334	-24.2725	-24.9189	-24.8854
27700	-21.781	-24.2936	-24.8679	-26.9802
27800	-21.577	-24.3013	-24.8914	-26.1332
27900	-21.8527	-24.2941	-24.9454	-25.0968
28000	-20.8575	-24.2722	-24.9644	-24.6097
28100	-21.6955	-25.1978	-24.627	-24.6644
28200	-21.3459	-24.3325	-24.6629	-24.9348
28300	-21.8357	-25.2164	-24.7567	-25.1522
28400	-22.832	-24.6123	-24.8478	-24.6365
28500	-22.9385	-25.2879	-24.5145	-25.3926
28600	-22.9354	-24.5719	-24.0862	-25.3616
28700	-22.936	-25.1523	-23.561	-25.3629
28800	-22.9362	-24.89	-24.1201	-25.3831
28900	-22.9371	-24.5492	-24.3437	-25.3687
29000	-22.9325	-23.8154	-23.537	-25.3579
29100	-22.0359	-24.9976	-23.954	-26.3798
29200	-22.9322	-24.4167	-24.3678	-27.1516
29300	-22.7436	-23.9395	-24.8627	-27.2739
29400	-22.3044	-25.0509	-24.1594	-26.1653
29500	-21.697	-25.1784	-24.9999	-27.3412
29600	-21.8058	-23.5422	-24.6005	-26.7738
29700	-22.2682	-23.6872	-23.2271	-27.0374
29800	-21.7835	-25.1135	-23.6917	-26.1653
29900	-22.2654	-25.0323	-23.5223	-24.3525
30000	-22.6811	-23.2623	-22.9541	-24.303
30100	-21.9892	-23.427	-23.8247	-24.3596
30200	-21.5271	-23.4447	-23.2153	-24.3157
30300	-21.9904	-23.3984	-23.7002	-24.4818
30400	-22.0361	-23.3554	-23.4925	-24.4833
30500	-20.5555	-23.465	-23.8869	-24.4938
30600	-21.4087	-23.0844	-23.7438	-24.0248
30700	-21.1343	-23.1413	-23.872	-24.2436
30800	-20.8799	-23.1716	-23.64	-23.7941
30900	-20.7336	-22.8381	-23.6553	-23.9508
31000	-21.7904	-22.6804	-23.633	-23.6377
31100	-21.6036	-22.6798	-24.4764	-23.6431
31200	-21.7273	-22.6786	-23.6594	-23.7499
31300	-21.618	-22.6802	-24.3885	-23.6567
31400	-21.2406	-22.6799	-24.1058	-23.6749
31500	-21.1993	-22.6784	-24.4976	-23.7781
31600	-21.3261	-22.6647	-24.3542	-23.8849
31700	-21.5152	-22.6711	-24.4336	-23.998
31800	-21.2153	-22.6783	-23.283	-23.9682
31900	-21.4192	-22.669	-23.1148	-23.977
32000	-21.5368	-22.6627	-22.7125	-24.0386
32100	-21.4073	-22.8901	-22.7073	-23.8972
32200	-21.224	-22.7756	-22.6104	-23.9257
32300	-21.4731	-22.8755	-22.6587	-23.9352
32400	-21.2986	-22.8491	-22.6958	-23.8025
32500	-21.1028	-23.0044	-22.6034	-23.571
32600	-21.3851	-22.691	-23.2564	-23.8001
32700	-21.6392	-22.8547	-23.6965	-23.6975
32800	-21.7626	-22.8942	-23.7855	-23.7346
32900	-21.4819	-22.7669	-23.774	-23.5859
33000	-21.9813	-22.5227	-24.2075	-23.8729
33100	-22.2116	-22.3432	-24.1974	-23.6517
33200	-22.5739	-22.3763	-24.1075	-23.8255
33300	-21.9986	-22.4362	-23.9305	-23.7279
33400	-22.4641	-22.3939	-24.0513	-23.5952
33500	-22.7063	-22.3043	-23.9172	-23.5751
33600	-22.5509	-22.9859	-23.3067	-23.4813
33700	-22.5709	-22.4135	-23.4527	-23.4367
33800	-22.6786	-22.3312	-23.3573	-23.3019
33900	-21.886	-22.9388	-23.6393	-23.3732
34000	-21.6693	-23.2073	-23.0723	-23.255
34100	-21.5177	-22.9703	-23.2363	-23.3654
34200	-21.4882	-22.8642	-23.1465	-23.3287
34300	-21.3945	-23.1515	-23.1075	-23.4846
34400	-21.6003	-22.8458	-23.1593	-23.5191
34500	-21.3835	-22.8214	-23.2623	-23.6523
34600	-21.4725	-22.4836	-23.2662	-24.0914
34700	-21.4961	-22.332	-23.3027	-24.2703
34800	-21.625	-21.9623	-23.3009	-24.1481
34900	-21.4154	-22.7491	-23.269	-24.1522
35000	-21.6428	-21.8058	-23.337	-24.8057
35100	-21.5572	-22.5693	-24.4238	-25.043
35200	-21.3938	-22.1814	-23.8425	-24.9231
35300	-21.4816	-23.0995	-23.9085	-24.8811
35400	-21.3971	-22.7975	-23.4911	-25.0863
35500	-21.3224	-24.864	-24.5227	-25.123
35600	-21.659	-24.9313	-24.5269	-24.4918
35700	-21.3771	-24.9521	-24.6029	-25.0145
35800	-21.4489	-24.9501	-24.7541	-23.6146
35900	-21.7643	-24.9515	-24.654	-24.8602
36000	-21.9072	-24.9644	-24.7731	-23.4686
36100	-21.9108	-24.6035	-24.7335	-23.4857
36200	-21.9096	-24.5244	-24.7401	-23.7436
36300	-21.9102	-24.6606	-24.7056	-23.5632
36400	-21.9099	-24.5792	-24.7152	-23.5754
36500	-21.912	-24.5145	-24.6994	-23.8363
36600	-22.2544	-24.372	-23.4008	-24.0895
36700	-21.9296	-23.6909	-23.3545	-24.0288
36800	-22.0608	-24.0966	-24.4764	-24.5906
36900	-21.9764	-23.81	-24.0623	-24.0358
37000	-22.5682	-23.537	-23.2997	-24.797
37100	-22.3174	-24.3971	-24.037	-24.5623
37200	-22.2673	-24.4074	-23.9127	-24.1104
37300	-22.4685	-24.8949	-23.5472	-24.2084
37400	-22.2049	-23.5465	-23.4801	-23.8001
37500	-22.0664	-24.9999	-24.1666	-23.5105
37600	-22.3956	-24.9963	-24.1292	-24.2318
37700	-22.2891	-23.7524	-24.0969	-24.3086
37800	-22.3324	-23.0877	-23.7566	-24.0963
37900	-22.3474	-23.5877	-22.9812	-23.5234
38000	-22.5282	-22.9541	-22.9084	-24.4528
38100	-21.2084	-23.4137	-22.928	-23.8237
38200	-21.4683	-23.499	-22.9376	-23.3038
38300	-21.1072	-23.1247	-23.0873	-23.7908
38400	-21.3004	-23.6253	-23.4444	-24.2764
38500	-20.952	-23.8869	-23.4609	-23.2779
38600	-20.8238	-23.6888	-23.5973	-24.074
38700	-20.8271	-23.7868	-23.7466	-23.4489
38800	-20.9105	-23.7382	-23.7563	-23.6681
38900	-20.8961	-23.7584	-23.829	-23.5323
39000	-20.5218	-23.633	-23.9385	-24.557
39100	-20.5684	-23.7961	-23.9549	-23.6402
39200	-20.6456	-24.2376	-23.9397	-24.2809
39300	-20.5298	-23.6399	-23.9864	-23.0696
39400	-20.5617	-24.0057	-23.9558	-23.5421
39500	-20.6593	-24.4976	-24.0045	-23.0088
39600	-22.3594	-24.2687	-24.0063	-24.0852
39700	-22.0375	-23.6027	-24.0105	-23.9781
39800	-21.2541	-24.2225	-24.0073	-24.1174
39900	-21.0676	-23.5285	-24.0053	-24.3066
40000	-22.5628	-22.7125	-24.0166	-25.1453
40100	-22.159	-22.6758	-23.7527	-24.7331
40200	-21.2266	-22.7058	-23.7713	-24.3719
40300	-21.628	-22.6605	-23.4705	-23.8043
40400	-22.4701	-22.6179	-23.4687	-24.8441
40500	-20.7403	-22.6034	-23.4067	-23.4447
40600	-21.2784	-23.9506	-23.3884	-23.8545
40700	-21.811	-23.0089	-23.2773	-24.0314
40800	-21.3605	-23.6311	-23.3578	-23.6327
40900	-21.1968	-22.6352	-23.402	-23.591
41000	-22.0656	-24.2075	-23.217	-24.3543
41100	-22.0652	-24.0886	-23.0467	-24.1176
41200	-22.0591	-24.09	-22.8402	-24.2661
41300	-21.9207	-23.9804	-23.1352	-24.1574
41400	-21.9393	-24.1923	-22.9547	-24.0221
41500	-21.7686	-23.9172	-22.5828	-23.9978
41600	-21.2354	-23.1623	-23.2621	-23.5569
41700	-21.7187	-23.4718	-23.722	-23.5618
41800	-20.9832	-23.1808	-23.1492	-23.5533
41900	-21.706	-23.1571	-23.2146	-23.8855
42000	-20.9794	-23.0723	-24.4319	-23.542
42100	-21.0626	-23.0897	-23.5384	-23.845
42200	-21.1663	-23.1099	-23.5015	-23.7111
42300	-21.197	-23.1895	-23.4698	-23.8307
42400	-21.0745	-23.0957	-22.8506	-23.8351
42500	-21.5361	-23.2623	-22.7298	-23.8751
42600	-22.0204	-23.302	-23.0076	-23.9018
42700	-21.5607	-23.3281	-23.3924	-23.8998
42800	-21.9043	-23.2965	-23.3672	-23.9558
42900	-22.0092	-23.319	-23.1434	-23.9457
43000	-22.4711	-23.337	-23.4132	-23.9638
43100	-21.7853	-24.4881	-23.6144	-24.3854
43200	-21.7895	-24.2213	-23.5502	-24.1303
43300	-21.6227	-24.2029	-23.5955	-24.2899
43400	-21.9626	-24.23	-23.5964	-24.2529
43500	-21.1878	-24.5227	-23.9042	-24.4048
43600	-21.9441	-24.7287	-23.8971	-24.4087
43700	-22.0301	-24.6249	-23.5702	-24.4865
43800	-21.6521	-24.7391	-23.7953	-24.4799
43900	-21.5636	-24.5593	-23.8613	-24.4118
44000	-22.6049	-24.7731	-23.5265	-24.5136
44100	-21.8088	-24.7426	-23.9515	-23.8169
44200	-22.0537	-24.6995	-23.57	-24.2722
44300	-21.0934	-24.7594	-23.8016	-24.0118
44400	-21.7929	-24.7314	-23.5513	-24.1429
44500	-20.6213	-24.6994	-24.1046	-23.8061
44600	-20.8258	-24.1032	-24.1324	-23.9507
44700	-20.9024	-23.3238	-24.1547	-23.8805
44800	-20.7031	-23.4748	-24.1756	-23.9492
44900	-20.8556	-24.0786	-24.1438	-24.0106
45000	-21.0126	-23.2997	-24.1784	-24.254
45100	-21.3676	-23.477	-24.433	-24.3442
45200	-21.0977	-24.1019	-24.373	-24.8426
45300	-21.3804	-23.4039	-24.3061	-24.6532
45400	-21.168	-23.4001	-24.1843	-24.4215
45500	-21.667	-24.1666	-24.4798	-24.9151
45600	-22.1608	-23.339	-24.1592	-24.7045
45700	-21.8915	-23.0565	-22.9381	-24.8423
45800	-22.1856	-22.9087	-22.5774	-24.8745
45900	-22.1699	-23.8148	-23.4647	-24.8592
46000	-22.5297	-22.9084	-22.5141	-24.6668
46100	-22.0906	-22.9537	-22.6312	-24.4838
46200	-22.3009	-23.5946	-23.1329	-24.0605
46300	-22.0781	-23.619	-23.7155	-23.8942
46400	-22.4342	-23.5169	-23.591	-24.4449
46500	-21.9378	-23.6891	-24.337	-23.6782
46600	-22.522	-23.6733	-24.3291	-24.1918
46700	-22.0412	-22.6789	-24.2858	-25.0282
46800	-22.0311	-23.0999	-24.3185	-25.2256
46900	-22.302	-23.0749	-24.3253	-24.5953
47000	-22.772	-22.4959	-24.2762	-25.256
47100	-21.0559	-22.4144	-23.1286	-25.0793
47200	-20.9908	-22.3689	-23.4713	-24.4313
47300	-20.9045	-22.4357	-23.7327	-24.344
47400	-22.0882	-22.4002	-23.786	-24.3371
47500	-20.5162	-22.2645	-22.7991	-23.4535
47600	-21.1382	-22.0494	-23.9007	-24.1663
47700	-21.2898	-22.2262	-23.2708	-23.976
47800	-21.1181	-21.9879	-23.7608	-23.8046
47900	-21.2417	-21.9498	-23.742	-24.4024
48000	-21.3524	-21.919	-24.1657	-24.9465
48100	-20.8567	-22.117	-23.1814	-24.3234
48200	-21.1239	-22.4081	-22.7394	-24.0698
48300	-20.853	-22.4021	-22.8587	-24.3314
48400	-20.7769	-22.6766	-22.7161	-24.521
48500	-20.7273	-22.9571	-22.5437	-23.9365
48600	-21.1189	-23.2055	-22.7114	-24.7532
48700	-21.1146	-23.2117	-23.8598	-24.4693
48800	-21.1822	-22.9824	-23.7554	-24.8172
48900	-21.0012	-22.973	-22.6312	-24.2586
49000	-21.752	-23.2536	-24.1427	-25.1055
49100	-21.8292	-22.3124	-24.114	-25.0772
49200	-21.7764	-23.0389	-24.0293	-24.8681
49300	-21.8023	-22.9139	-23.7753	-25.026
49400	-21.8423	-22.9618	-23.7387	-24.9043
49500	-21.9873	-22.2631	-23.6677	-24.8142
49600	-21.6685	-22.5761	-23.0193	-24.6952
49700	-21.5494	-22.4965	-23.0779	-24.8031
49800	-21.8432	-22.469	-23.3312	-24.6458
49900	-21.5119	-22.3452	-23.4217	-24.6976
50000	-21.1942	-22.6061	-22.8967	-24.641
50100	-22.1227	-22.6496	-23.0405	-24.3367
50200	-21.7796	-22.672	-24.0866	-24.5113
50300	-21.4655	-22.7845	-22.9603	-23.9278
50400	-22.4042	-22.6144	-23.3663	-23.9339
50500	-22.426	-22.8827	-24.5487	-23.8679
50600	-21.8702	-21.9979	-24.6151	-24.0273
50700	-22.0909	-22.6909	-24.5648	-24.069
50800	-21.5282	-22.8391	-24.6347	-24.1107
50900	-21.7134	-22.1586	-24.6508	-24.0009
51000	-21.3891	-21.9301	-24.6563	-24.5289
51100	-21.7093	-22.3187	-23.529	-24.2305
51200	-22.624	-23.7813	-23.0531	-23.2828
51300	-22.723	-23.2241	-24.345	-24.3519
51400	-22.6644	-23.6919	-23.2697	-23.2561
51500	-22.7394	-23.7826	-22.6693	-23.1427
51600	-22.4058	-23.7599	-22.8075	-24.7452
51700	-22.164	-23.7686	-22.8131	-23.7533
51800	-21.7502	-23.771	-23.1304	-23.338
51900	-22.3557	-23.7378	-23.142	-23.3049
52000	-21.4335	-23.6614	-23.2072	-24.7725
52100	-21.5806	-23.3011	-23.9934	-24.8659
52200	-21.6148	-23.4006	-23.2318	-24.8734
52300	-21.5036	-23.4847	-23.7581	-24.8908
52400	-21.4797	-23.5028	-23.3229	-24.9165
52500	-21.722	-23.2094	-24.1589	-24.9613
52600	-21.4632	-23.1258	-23.4421	-24.8775
52700	-21.613	-23.2038	-23.2738	-24.7448
52800	-21.072	-23.1591	-24.0617	-24.7528
52900	-21.4943	-23.1321	-23.9278	-24.9574
53000	-20.9303	-23.084	-23.2433	-24.6598
53100	-20.8572	-23.1789	-22.9406	-24.9495
53200	-20.8016	-23.4081	-22.9384	-24.6684
53300	-20.6779	-23.203	-22.9229	-24.7429
53400	-20.6694	-23.4218	-23.0444	-24.7968
53500	-20.627	-23.5197	-22.8815	-25.0017
53600	-20.6189	-23.2124	-22.9333	-24.8894
53700	-20.6175	-22.9754	-23.0336	-24.8341
53800	-20.6115	-22.719	-23.1417	-24.916
53900	-20.6204	-22.2528	-23.1581	-24.9403
54000	-20.6057	-22.1692	-23.2854	-24.8158
54100	-21.5284	-22.3598	-23.5469	-24.888
54200	-21.3299	-22.2694	-23.3991	-24.8648
54300	-20.8961	-22.6597	-23.6272	-24.8343
54400	-21.5812	-22.4684	-23.3816	-24.8535
54500	-21.9762	-22.6878	-23.6785	-24.9437
54600	-21.7584	-21.6349	-23.9861	-24.8954
54700	-21.6039	-22.3573	-23.7073	-24.3968
54800	-21.8582	-22.183	-23.9151	-24.6171
54900	-21.6572	-21.653	-23.9486	-24.9237
55000	-21.6036	-21.6118	-23.9977	-23.4512
55100	-21.7922	-21.8951	-23.8004	-23.7744
55200	-21.8183	-22.167	-23.1146	-23.4596
55300	-21.7813	-21.9505	-23.7548	-23.5631
55400	-21.7523	-22.8467	-23.2217	-23.4785
55500	-21.872	-23.3123	-22.6032	-23.8648
55600	-21.367	-23.1382	-22.8813	-24.3134
55700	-21.4569	-23.2997	-22.9609	-24.0912
55800	-21.5881	-23.2099	-22.9405	-24.1479
55900	-21.2525	-23.0274	-22.8882	-24.0621
56000	-21.1806	-22.9871	-22.9726	-24.5951
56100	-21.4076	-22.8639	-23.7616	-24.2379
56200	-21.1835	-22.8721	-23.9202	-24.5805
56300	-21.4043	-22.8941	-23.7521	-24.4544
56400	-21.4058	-22.8891	-23.8264	-24.0767
56500	-21.4432	-22.8254	-24.1208	-23.6325
56600	-21.4531	-22.4556	-23.9576	-24.505
56700	-21.528	-22.8146	-24.0926	-24.018
56800	-21.5842	-22.5641	-23.9488	-24.3303
56900	-21.5879	-22.7073	-23.9564	-24.368
57000	-21.6178	-22.4508	-23.8683	-24.5781
57100	-20.6273	-23.3802	-23.7731	-24.5391
57200	-21.2911	-23.1008	-23.4008	-24.5414
57300	-21.5956	-23.1554	-23.7855	-24.4841
57400	-21.4449	-22.4873	-23.5923	-24.5057
57500	-20.6161	-23.5799	-23.3269	-24.4456
57600	-21.2303	-23.3585	-23.3706	-24.304
57700	-20.8259	-23.3037	-24.4358	-24.2614
57800	-20.8116	-23.2847	-23.7129	-24.2699
57900	-21.5439	-23.4183	-24.4459	-24.2747
58000	-21.744	-23.2665	-24.5173	-24.1887
58100	-22.2319	-23.3417	-24.1489	-24.3184
58200	-21.9726	-23.2877	-23.9693	-24.1918
58300	-21.9012	-23.3612	-23.403	-24.4227
58400	-22.1704	-23.4861	-23.4372	-24.2291
58500	-22.2477	-23.4862	-23.363	-24.5451
58600	-22.4713	-22.6128	-22.9205	-24.4995
58700	-22.3747	-22.9204	-22.912	-23.4881
58800	-22.3128	-22.6906	-22.926	-24.312
58900	-22.4798	-22.2324	-23.1724	-23.8638
59000	-22.4807	-22.2074	-22.9082	-23.1117
59100	-21.939	-22.2422	-22.9896	-23.3883
59200	-22.1038	-22.2487	-22.9366	-23.2307
59300	-22.0299	-22.4296	-22.9938	-23.805
59400	-21.7262	-22.3256	-22.9728	-23.6665
59500	-21.7099	-22.4697	-23.0167	-23.8171
59600	-22.2542	-23.0951	-23.1707	-24.7327
59700	-22.3022	-22.8738	-23.1716	-24.2814
59800	-22.1035	-22.5177	-23.1816	-24.4224
59900	-21.845	-22.5815	-23.2617	-24.2663
60000	-22.4114	-23.3587	-23.352	-24.9752
60100	-21.8992	-22.75	-23.567	-24.9097
60200	-22.2637	-22.7621	-23.4508	-24.9131
60300	-22.0957	-22.9355	-23.4291	-24.9543
60400	-22.15	-22.8293	-23.548	-24.9217
60500	-21.7402	-22.6062	-23.6244	-24.8795
60600	-21.8222	-22.1076	-23.4233	-24.7264
60700	-21.8114	-22.4109	-23.3173	-24.2881
60800	-22.5283	-21.8192	-23.5694	-24.7409
60900	-22.1126	-21.8426	-22.9152	-24.7654
61000	-22.7096	-21.7758	-22.8695	-23.9861
61100	-21.1959	-21.8095	-24.2985	-24.0197
61200	-21.8382	-22.2406	-23.451	-24.1219
61300	-22.1592	-21.8711	-24.1234	-24.4528
61400	-22.0962	-22.1425	-24.1146	-24.8749
61500	-20.682	-22.2602	-24.5656	-25.0999
61600	-22.2794	-22.3389	-24.4492	-24.4135
61700	-21.8242	-22.3959	-24.5587	-24.009
61800	-22.3731	-22.3552	-23.1142	-24.361
61900	-21.9703	-22.6696	-23.6264	-23.8444
62000	-22.3756	-22.73	-22.9855	-23.7526
62100	-21.9889	-22.5932	-22.6326	-24.2055
62200	-22.1245	-22.6086	-22.916	-24.1538
62300	-22.2417	-22.636	-22.9807	-24.5374
62400	-21.9922	-22.3757	-22.8449	-23.8559
62500	-21.9515	-22.213	-22.5826	-24.6945
62600	-21.2187	-22.1319	-22.758	-24.5806
62700	-21.2084	-22.2063	-22.7351	-24.5471
62800	-21.4736	-22.1408	-23.1784	-24.1461
62900	-21.9184	-22.104	-22.6955	-24.3606
63000	-21.1593	-22.0608	-23.3448	-23.5744
63100	-21.2911	-22.3683	-23.3107	-24.1522
63200	-21.5484	-22.4439	-23.2901	-23.7856
63300	-21.4682	-22.3149	-23.3288	-24.0236
63400	-21.1787	-23.1142	-23.344	-23.9674
63500	-21.771	-23.2603	-23.2673	-24.1819
63600	-22.2891	-23.1358	-23.9478	-24.2
63700	-22.736	-22.6212	-23.9446	-24.3526
63800	-22.7166	-22.5633	-23.5837	-24.6552
63900	-22.3167	-22.9365	-23.7393	-24.6986
64000	-22.7538	-22.5581	-24.1145	-24.7523
64100	-21.0499	-22.1199	-24.1094	-24.8915
64200	-22.723	-22.3762	-24.0631	-24.7898
64300	-21.0976	-22.0894	-24.0729	-24.8338
64400	-22.3938	-22.2919	-23.9918	-24.8555
64500	-20.7518	-22.0629	-23.9719	-24.9447
64600	-21.2453	-22.7586	-24.0791	-24.461
64700	-21.8149	-22.9513	-24.0728	-24.3375
64800	-21.8706	-22.7456	-24.2491	-24.0928
64900	-21.4194	-22.5845	-23.9877	-23.6486
65000	-22.6001	-23.7168	-24.3196	-23.5303
65100	-22.5863	-23.6183	-24.2273	-24.3825
65200	-22.5637	-21.9088	-24.1925	-24.0919
65300	-22.5673	-22.2522	-24.053	-24.6134
65400	-22.5264	-22.4834	-23.9489	-23.541
65500	-22.5066	-21.645	-23.842	-24.8298
65600	-22.1913	-22.2014	-23.8402	-24.3059
65700	-22.4184	-21.6605	-23.7584	-24.4643
65800	-22.2008	-21.9097	-23.7696	-24.2245
65900	-22.1282	-21.8171	-23.8353	-24.8022
66000	-21.981	-22.4186	-23.7138	-24.1273
66100	-22.0933	-22.2305	-23.9786	-24.1974
66200	-22.1668	-22.3087	-23.9768	-24.1322
66300	-22.2502	-22.2777	-23.9661	-24.2545
66400	-22.0535	-21.9659	-24.1106	-24.2062
66500	-22.4484	-21.8417	-24.1208	-24.2922
66600	-22.4174	-22.6916	-24.0257	-24.7007
66700	-22.4461	-22.7902	-23.3286	-24.538
66800	-22.4385	-22.3309	-23.832	-24.4682
66900	-22.4367	-21.8419	-23.8054	-24.6554
67000	-22.4012	-22.9246	-23.3169	-24.7538
67100	-21.95	-23.0095	-23.3777	-24.7503
67200	-22.0103	-22.9902	-23.8468	-24.7451
67300	-21.8508	-23.0255	-23.8283	-24.7145
67400	-21.1358	-23.0083	-23.8817	-24.7123
67500	-20.5405	-23.0992	-24.139	-24.6536
67600	-20.8532	-23.0772	-24.1441	-24.4068
67700	-20.6951	-23.0274	-24.1393	-24.2405
67800	-20.92	-23.0195	-24.179	-24.4628
67900	-20.5675	-23.0151	-24.1598	-23.6468
68000	-20.9207	-23.004	-24.1845	-23.5732
68100	-20.9329	-21.9877	-24.4758	-23.7081
68200	-21.3121	-22.2235	-24.5906	-23.5883
68300	-20.9396	-22.0796	-24.4413	-23.7708
68400	-21.2572	-22.9301	-24.7114	-23.8831
68500	-21.5194	-21.8174	-24.7555	-23.9987
68600	-21.7541	-22.1279	-24.1615	-23.9683
68700	-21.8275	-23.3382	-23.8299	-23.9977
68800	-21.7806	-22.5886	-23.8683	-23.8866
68900	-21.8064	-23.2333	-24.2669	-23.6458
69000	-22.0555	-23.3979	-23.5788	-23.3982
69100	-21.9169	-23.419	-23.6013	-24.3767
69200	-21.7701	-23.4883	-23.5898	-25.0811
69300	-21.9062	-23.5948	-23.6036	-24.5459
69400	-21.4803	-23.4156	-23.5939	-24.7471
69500	-21.3956	-23.6432	-23.6062	-25.2308
69600	-21.5631	-22.5144	-23.6014	-24.5994
69700	-21.575	-22.9811	-23.602	-23.9896
69800	-21.4814	-21.7773	-23.6013	-24.1287
69900	-21.5346	-22.093	-23.6019	-24.5368
70000	-21.575	-21.5786	-23.601	-23.8936
70100	-20.7996	-21.659	-22.9585	-23.747
70200	-20.6564	-22.9495	-23.1197	-23.4361
70300	-21.3351	-22.1899	-23.0416	-23.3631
70400	-20.9608	-22.0264	-23.2592	-23.8296
70500	-20.5231	-23.557	-22.9435	-23.2648
70600	-20.9681	-23.5392	-22.9891	-25.1454
70700	-20.5309	-23.4854	-22.9455	-23.7592
70800	-20.7218	-23.4942	-22.9666	-24.0803
70900	-20.5585	-23.4634	-22.9929	-25.066
71000	-21.0515	-23.4503	-23.0218	-25.2763
71100	-20.7491	-23.1838	-23.7991	-24.8656
71200	-20.9468	-21.5922	-23.5524	-24.6331
71300	-20.8974	-21.9988	-23.4916	-24.7189
71400	-20.9024	-22.1889	-23.7615	-25.2093
71500	-20.6621	-21.5118	-24.1105	-24.5827
71600	-20.6528	-22.9883	-23.275	-24.5725
71700	-20.6475	-22.7605	-22.7392	-24.5323
71800	-20.6434	-23.418	-23.3495	-24.5766
71900	-20.6562	-22.1362	-22.9272	-24.5606
72000	-20.6418	-23.4728	-22.7333	-24.5102
72100	-20.7025	-23.6343	-23.2598	-24.0461
72200	-20.7222	-23.4836	-23.9015	-24.3347
72300	-20.7309	-23.5509	-22.9939	-23.8862
72400	-20.6464	-23.6535	-24.0223	-23.8997
72500	-20.8638	-23.6567	-24.1033	-23.1641
72600	-21.6944	-23.1853	-23.578	-23.5682
72700	-21.8279	-23.1201	-23.3133	-24.0316
72800	-22.2264	-23.3118	-23.7645	-24.0709
72900	-21.0386	-23.2446	-23.9341	-24.9458
73000	-22.4222	-23.0956	-23.0809	-24.9539
73100	-21.885	-21.7778	-23.004	-24.8595
73200	-21.1172	-22.0298	-23.0783	-24.4081
73300	-22.4067	-21.875	-23.0713	-24.6672
73400	-21.9646	-22.5534	-23.0642	-24.338
73500	-20.7824	-21.7608	-22.9941	-24.2168
73600	-21.5687	-21.8575	-23.461	-23.753
73700	-20.9883	-21.883	-23.0368	-23.233
73800	-21.4771	-21.876	-23.8524	-23.5458
73900	-21.2757	-21.8167	-23.2198	-23.3301
74000	-21.7358	-21.8967	-23.9589	-23.22
74100	-21.0884	-22.1655	-23.6122	-23.5688
74200	-21.3313	-22.6575	-23.6724	-24.6597
74300	-20.7896	-21.9828	-23.322	-24.1386
74400	-21.1502	-22.3896	-23.5347	-24.038
74500	-20.731	-22.6929	-23.003	-24.8114
74600	-21.674	-22.6065	-23.1006	-24.501
74700	-21.0949	-22.5814	-23.1563	-24.1776
74800	-21.448	-22.601	-23.2779	-24.804
74900	-21.6276	-22.6656	-23.5198	-23.2616
75000	-22.5311	-22.5688	-23.9072	-23.2402
75100	-21.108	-22.1695	-24.0474	-23.3558
75200	-21.2843	-22.1569	-23.9415	-23.4892
75300	-21.1605	-22.3921	-24.0652	-23.2407
75400	-21.1027	-22.4364	-24.1069	-24.462
75500	-20.9737	-21.9565	-24.1318	-24.8616
75600	-21.9866	-22.351	-24.1742	-24.9598
75700	-22.2864	-22.2619	-24.1813	-24.9961
75800	-22.347	-22.1205	-24.3365	-24.9201
75900	-22.4198	-22.4924	-24.2443	-24.9422
76000	-22.4511	-22.7549	-24.4612	-25.0243
76100	-22.2167	-22.8821	-23.3588	-24.7991
76200	-21.9623	-22.8122	-23.5923	-24.6435
76300	-21.7795	-22.79	-22.9906	-24.674
76400	-22.0298	-22.7864	-23.0376	-24.731
76500	-21.4893	-23.0532	-22.5968	-24.6101
76600	-22.4762	-22.8551	-23.4581	-24.2946
76700	-22.2035	-22.8244	-24.3219	-24.0879
76800	-22.0208	-22.9027	-23.8201	-24.0843
76900	-21.8458	-22.9717	-22.8463	-24.2363
77000	-22.5455	-22.7433	-24.6246	-24.0426
77100	-22.5076	-23.0415	-24.4697	-23.6049
77200	-22.5111	-22.7456	-24.4923	-23.9687
77300	-22.4931	-23.0292	-24.2955	-23.5909
77400	-22.5142	-22.9343	-24.2533	-23.2064
77500	-22.4552	-23.0746	-23.8045	-23.1574
77600	-21.5225	-23.3753	-24.6224	-24.0889
77700	-21.6207	-23.1772	-24.6806	-24.1316
77800	-22.3747	-23.5863	-24.5839	-24.2957
77900	-21.3627	-23.6034	-24.0499	-24.3168
78000	-21.2039	-23.7116	-24.685	-24.3811
78100	-21.0923	-22.6248	-24.631	-24.5325
78200	-21.1527	-22.196	-24.4719	-25.0055
78300	-20.8683	-22.3765	-24.5699	-24.5003
78400	-20.9488	-22.8569	-24.2491	-24.853
78500	-20.7106	-21.7412	-24.2435	-25.0598
78600	-21.479	-22.5947	-23.1894	-24.8363
78700	-20.924	-21.9124	-24.2277	-24.9026
78800	-21.7729	-22.4077	-23.419	-24.9656
78900	-21.0016	-22.1576	-23.759	-24.9483
79000	-22.4473	-23.4546	-23.163	-24.8062
79100	-21.1813	-23.5402	-23.2516	-24.1143
79200	-21.4148	-23.5296	-23.3092	-23.879
79300	-22.2349	-23.5927	-23.4133	-24.0994
79400	-21.2598	-23.4829	-23.2332	-24.6922
79500	-20.7941	-23.605	-23.4348	-23.7849
79600	-21.0564	-21.6819	-23.2924	-24.6181
79700	-20.9353	-23.1432	-23.3095	-24.5639
79800	-20.9481	-21.9416	-23.2256	-24.1009
79900	-21.0217	-23.5351	-23.0399	-24.4837
80000	-21.1734	-21.6	-22.977	-24.6184
80100	-21.1399	-21.851	-22.9444	-23.936
80200	-21.1544	-22.003	-22.6404	-23.4801
80300	-21.1291	-22.0164	-22.7092	-24.4222
80400	-21.125	-21.7991	-22.9521	-24.6145
80500	-21.1062	-22.0183	-22.5522	-23.0696
80600	-20.5519	-22.0972	-23.6131	-23.6596
80700	-20.7987	-22.1706	-22.7433	-23.5132
80800	-20.9233	-22.2692	-23.3287	-23.6425
80900	-20.7312	-22.1123	-23.5457	-23.1604
81000	-20.5349	-22.2813	-24.2311	-23.7084
81100	-20.7734	-22.0108	-23.4272	-23.7828
81200	-20.8584	-21.8049	-23.2797	-23.9619
81300	-20.7173	-22.2385	-23.9004	-23.8164
81400	-21.4094	-22.2639	-23.8926	-23.7971
81500	-21.6067	-21.5739	-23.0253	-23.9714
81600	-21.3725	-22.5503	-22.9956	-24.2042
81700	-21.5077	-22.4708	-22.9352	-23.9868
81800	-21.4459	-21.7508	-22.6782	-23.9778
81900	-21.2637	-22.6811	-22.7966	-24.3598
82000	-20.9534	-23.3269	-22.6698	-24.4931
82100	-20.9258	-23.2515	-22.7334	-24.6032
82200	-20.7741	-22.8635	-22.7335	-24.6199
82300	-20.7025	-22.8428	-22.8293	-24.5735
82400	-20.7844	-23.0606	-22.7057	-24.7789
82500	-20.6843	-22.5803	-22.8495	-25.1052
82600	-20.8554	-22.1602	-23.1983	-24.8108
82700	-22.1656	-22.0318	-23.3264	-24.9216
82800	-22.0944	-22.3486	-22.8749	-24.6117
82900	-22.033	-21.936	-23.1082	-25.0201
83000	-22.2834	-21.5461	-23.694	-24.4237
83100	-22.1853	-21.934	-22.7266	-24.5865
83200	-22.2664	-21.9436	-22.687	-24.563
83300	-21.976	-21.6279	-22.8	-24.5692
83400	-21.8936	-21.7922	-23.1662	-24.5851
83500	-21.8365	-22.2901	-22.6851	-24.6024
83600	-22.0876	-22.7533	-22.8062	-24.4237
83700	-22.7408	-22.7216	-23.8276	-24.2842
83800	-22.75	-22.6958	-23.3084	-24.224
83900	-22.2614	-22.486	-22.9545	-24.2599
84000	-22.7699	-22.944	-23.8973	-24.0774
84100	-22.1008	-23.0537	-23.9484	-23.9437
84200	-21.8795	-23.1654	-23.9517	-24.0349
84300	-22.2944	-23.1907	-23.9561	-24.0402
84400	-22.2661	-23.074	-23.9006	-24.0302
84500	-21.8464	-23.2464	-23.9786	-23.7903
84600	-22.113	-23.1448	-23.7455	-23.9588
84700	-21.8706	-23.2437	-23.7555	-24.2737
84800	-22.5635	-23.1468	-23.947	-24.3273
84900	-22.4785	-23.1989	-23.3446	-23.9862
85000	-22.6457	-23.1424	-23.2897	-24.3394
85100	-22.5615	-23.1487	-23.5947	-24.862
85200	-22.6079	-23.1708	-23.3486	-25.0058
85300	-22.4047	-23.1642	-23.4899	-24.7528
85400	-22.6381	-23.145	-23.5774	-24.9557
85500	-22.3614	-23.2198	-23.6363	-25.1234
85600	-21.9975	-22.2673	-23.0123	-23.4755
85700	-21.2617	-22.9949	-23.0774	-24.701
85800	-21.6895	-22.2445	-23.5483	-24.6387
85900	-22.3248	-22.809	-22.8999	-24.287
86000	-21.0163	-22.0142	-22.8064	-23.4263
86100	-21.5108	-22.0111	-23.0457	-23.9861
86200	-21.2234	-21.9472	-22.9287	-24.308
86300	-21.4986	-21.8455	-23.0424	-23.6119
86400	-21.4893	-21.9152	-23.2135	-24.4536
86500	-21.5128	-21.644	-23.4658	-24.4837
86600	-21.7319	-21.7436	-22.8087	-24.4091
86700	-21.5842	-21.8151	-23.4624	-24.4175
86800	-21.854	-21.7979	-22.9378	-24.3941
86900	-21.9383	-21.9019	-22.8441	-24.4049
87000	-21.9414	-21.9191	-22.7436	-24.3909
87100	-22.0605	-22.0701	-22.9293	-24.3497
87200	-22.3544	-22.212	-23.5068	-24.357
87300	-22.1385	-22.3506	-22.85	-24.3765
87400	-22.3945	-22.4969	-23.4431	-24.3694
87500	-22.4408	-22.5529	-23.7044	-24.3359
87600	-22.3332	-22.3646	-23.8104	-24.2807
87700	-22.4132	-22.4523	-23.9331	-24.2138
87800	-22.4019	-22.353	-23.8935	-24.2759
87900	-22.3399	-22.5081	-23.77	-24.3077
88000	-22.2685	-22.2156	-24.0374	-24.1444
88100	-22.2793	-22.6495	-23.2914	-23.6562
88200	-22.3155	-22.6629	-23.5814	-23.4023
88300	-22.3231	-22.2552	-23.4498	-23.3819
88400	-22.3667	-22.4015	-23.2865	-23.4312
88500	-22.3893	-22.7384	-22.6362	-23.1511
88600	-22.2075	-22.8593	-23.518	-23.2917
88700	-22.1497	-23.1964	-23.5945	-23.4618
88800	-21.5882	-23.4217	-23.1274	-23.3065
88900	-21.3281	-22.8152	-23.933	-23.422
89000	-21.1388	-23.5719	-24.036	-23.5695
89100	-22.1554	-22.617	-23.1244	-23.4409
89200	-22.2702	-22.4429	-23.4956	-23.4164
89300	-22.1882	-23.4417	-23.1738	-23.5397
89400	-22.0582	-23.169	-22.8403	-23.5121
89500	-22.3285	-22.1139	-22.7855	-23.4037
89600	-22.328	-22.1178	-24.0005	-23.8735
89700	-22.328	-22.5039	-24.2381	-23.74
89800	-22.3265	-22.3309	-23.1128	-24.307
89900	-22.3263	-22.2047	-23.1097	-24.0265
90000	-22.3219	-22.5253	-24.5059	-24.308
90100	-21.3292	-23.3103	-24.5741	-24.28
90200	-21.0746	-23.2127	-24.635	-24.2653
90300	-21.9646	-22.7298	-24.6242	-24.2469
90400	-21.4879	-23.3176	-24.5491	-24.2255
90500	-20.7469	-23.3343	-24.6743	-24.1868
90600	-20.981	-23.2351	-24.389	-24.8109
90700	-21.1792	-23.1259	-24.3816	-24.3397
90800	-20.8524	-23.3245	-24.3479	-25.0472
90900	-20.9886	-23.2597	-24.421	-25.0963
91000	-21.4423	-23.0971	-24.27	-25.2097
91100	-21.4509	-22.6946	-23.6181	-25.0957
91200	-21.7843	-22.5405	-24.1107	-25.05
91300	-21.7951	-22.2041	-24.1633	-24.7343
91400	-21.7503	-22.8638	-23.4493	-24.8669
91500	-21.7969	-22.1392	-23.275	-24.3911
91600	-21.0075	-22.1506	-23.7286	-23.279
91700	-21.2401	-22.176	-23.3595	-24.0265
91800	-21.5138	-22.1432	-23.7091	-23.916
91900	-21.2232	-22.1529	-23.6917	-23.6254
92000	-20.8025	-22.2001	-24.0518	-23.1225
92100	-21.1223	-23.4995	-23.3537	-24.7023
92200	-21.7368	-22.6972	-23.5476	-23.1274
92300	-21.4343	-23.1605	-23.8399	-24.6148
92400	-20.9442	-22.2979	-23.0096	-23.1722
92500	-22.7483	-23.5861	-22.7255	-25.2407
92600	-22.5375	-22.4978	-23.1147	-23.3766
92700	-22.6694	-23.5391	-23.2756	-23.8294
92800	-22.7087	-22.7356	-23.3582	-23.3638
92900	-22.5878	-23.4279	-22.9384	-23.803
93000	-22.4795	-22.466	-23.4415	-23.1414
93100	-22.4414	-21.9758	-23.6207	-23.4131
93200	-22.4499	-21.9906	-24.1044	-23.7887
93300	-22.2147	-22.1604	-24.348	-23.2869
93400	-22.2166	-22.407	-23.8598	-23.441
93500	-22.1737	-21.9485	-24.4152	-24.0431
93600	-22.1698	-22.6122	-24.2954	-24.0148
93700	-22.1705	-22.7118	-24.3228	-23.6258
93800	-22.1725	-23.3195	-24.2629	-23.844
93900	-22.1706	-23.473	-24.399	-23.7564
94000	-22.1697	-23.6653	-24.1897	-23.5582
94100	-22.4092	-23.551	-24.344	-25.1121
94200	-22.6145	-22.8274	-24.3062	-24.714
94300	-22.2511	-23.6316	-24.2436	-23.6888
94400	-22.6975	-23.1581	-24.2916	-24.4025
94500	-22.7747	-22.6103	-24.5642	-25.2618
94600	-22.7292	-22.9301	-23.7683	-25.2481
94700	-22.4004	-23.4066	-23.0458	-25.2493
94800	-21.4696	-23.2265	-23.1499	-25.2588
94900	-22.2997	-23.4125	-24.5491	-25.2462
95000	-21.4188	-23.5962	-22.8967	-25.2455
95100	-21.4285	-22.879	-23.1261	-25.1099
95200	-21.6451	-23.1574	-22.9706	-24.3075
95300	-21.7018	-22.3215	-23.1948	-23.9993
95400	-21.5186	-21.9447	-22.9702	-23.6691
95500	-21.9188	-21.6538	-23.2024	-23.3027
95600	-22.2097	-23.2268	-23.2351	-23.6714
95700	-22.2518	-22.4509	-23.8893	-23.9634
95800	-21.9863	-21.7862	-23.3664	-23.623
95900	-22.0471	-23.5003	-24.2864	-23.7004
96000	-22.6096	-23.5278	-24.3509	-23.9799
96100	-22.6093	-23.5159	-23.3597	-23.6746
96200	-22.2354	-23.2851	-24.0838	-23.9687
96300	-22.1012	-23.0319	-23.6413	-23.7733
96400	-22.2503	-22.7963	-24.1688	-23.9618
96500	-21.982	-22.4481	-23.1873	-23.489
96600	-21.2958	-22.7421	-23.641	-23.2092
96700	-21.3656	-22.8619	-23.4221	-23.4035
96800	-21.8803	-23.5714	-23.453	-23.4846
96900	-21.975	-22.7906	-23.8359	-23.0976
97000	-21.2736	-23.7444	-23.9248	-23.0603
97100	-21.8264	-22.704	-24.6306	-23.1506
97200	-21.6013	-23.587	-23.9848	-23.1353
97300	-22.0348	-22.0994	-24.4101	-23.166
97400	-21.3453	-23.3313	-24.5032	-23.1497
97500	-22.1968	-21.6364	-24.7421	-23.2202
97600	-22.1226	-22.4924	-24.6564	-23.282
97700	-22.1528	-22.3279	-24.2458	-23.3527
97800	-22.059	-21.8444	-24.0803	-23.3595
97900	-22.1038	-23.2125	-24.4389	-23.3668
98000	-22.0312	-23.372	-23.7934	-23.3856
98100	-21.9751	-23.594	-23.223	-23.3041
98200	-21.8444	-23.6056	-23.3685	-23.3177
98300	-21.7182	-23.3925	-23.268	-23.2962
98400	-21.8213	-23.4799	-23.3611	-23.2551
98500	-21.6604	-23.6146	-22.5758	-23.1601
98600	-20.9979	-22.0838	-24.2265	-23.7754
98700	-21.2009	-22.1716	-23.6957	-25.1041
98800	-21.2751	-23.183	-24.3518	-24.4373
98900	-21.4789	-23.5046	-22.5996	-24.9635
99000	-20.9613	-22.0393	-24.3877	-25.1079
99100	-22.352	-22.1758	-22.8241	-24.7731
99200	-21.2721	-22.0655	-23.3833	-24.4278
99300	-21.4793	-22.162	-24.2405	-24.6003
99400	-21.625	-22.1982	-23.3532	-24.8804
99500	-22.5894	-22.289	-22.8098	-24.2832
99600	-21.8472	-22.0656	-23.1115	-24.1201
99700	-20.7234	-22.0181	-23.2561	-23.912
99800	-21.2586	-22.0362	-23.0244	-24.0585
99900	-20.8077	-22.1563	-22.85	-23.8299
